# Supplementary material
Source: publisher figshare collection journal article supplement (https://karger.figshare.com/articles/dataset/_/5123644)
Supplement: Supplementary file 1 [file 1]

**Table S7. Summary of Statistically Significant Metabolomic Changes in Liver, Inguinal Adipose Tissue, Skeletal Muscle and Serum.**

| <i>Statistical Comparisons: Welch's Two Sample t-Test</i> |                 |                  |
|-----------------------------------------------------------|-----------------|------------------|
| <b><i>Liver</i></b>                                       | <b>MR vs CF</b> | <b>MRC vs CF</b> |
| Total number of biochemicals, $p \leq 0.05$               | <b>229</b>      | <b>135</b>       |
| Biochemicals, $p \leq 0.05$ (↑ ↓)                         | <b>65 164</b>   | <b>51 84</b>     |
| Total number of biochemicals, $0.05 < p < 0.01$           | <b>39</b>       | <b>54</b>        |
| Biochemicals, $0.05 < p < 0.01$ (↑ ↓)                     | <b>13 26</b>    | <b>17 37</b>     |
| <b><i>Inguinal Adipose Tissue</i></b>                     |                 |                  |
| Total number of biochemicals, $p \leq 0.05$               | <b>39</b>       | <b>5</b>         |
| Biochemicals, $p \leq 0.05$ (↑ ↓)                         | <b>30 9</b>     | <b>2 3</b>       |
| Total number of biochemicals, $0.05 < p < 0.01$           | <b>31</b>       | <b>9</b>         |
| Biochemicals, $0.05 < p < 0.01$ (↑ ↓)                     | <b>23 8</b>     | <b>7 2</b>       |
| <b><i>Muscle</i></b>                                      |                 |                  |
| Total number of biochemicals, $p \leq 0.05$               | <b>84</b>       | <b>41</b>        |
| Biochemicals, $p \leq 0.05$ (↑ ↓)                         | <b>33 51</b>    | <b>32 9</b>      |
| Total number of biochemicals, $0.05 < p < 0.01$           | <b>33</b>       | <b>19</b>        |
| Biochemicals, $0.05 < p < 0.01$ (↑ ↓)                     | <b>12 21</b>    | <b>13 6</b>      |
| <b><i>Serum</i></b>                                       |                 |                  |
| Total number of biochemicals, $p \leq 0.05$               | <b>141</b>      | <b>87</b>        |
| Biochemicals, $p \leq 0.05$ (↑ ↓)                         | <b>55 86</b>    | <b>23 64</b>     |
| Total number of biochemicals, $0.05 < p < 0.01$           | <b>27</b>       | <b>38</b>        |
| Biochemicals, $0.05 < p < 0.01$ (↑ ↓)                     | <b>11 16</b>    | <b>8 30</b>      |
