# Supplementary material
Source: publisher figshare collection journal article supplement (https://karger.figshare.com/articles/dataset/_/5123644)
Supplement: Supplementary file 2 [file 1]

**Table S5. Confirmation of Gene Expression by qPCR in Inguinal Adipose Tissue.**

| Gene           | Fold-Change |             |                |             |                |
|----------------|-------------|-------------|----------------|-------------|----------------|
|                | CF          | MR          | <i>P value</i> | MRC         | <i>P value</i> |
| <i>Acacb</i>   | 1.00 ± 0.21 | 0.86 ± 0.31 | 0.700          | 0.48 ± 0.22 | 0.384          |
| <i>Acly</i>    | 1.00 ± 0.16 | 2.84 ± 0.26 | <0.001*        | 0.65 ± 0.16 | 0.219          |
| <i>Aco2</i>    | 1.00 ± 0.05 | 1.93 ± 0.14 | <0.001*        | 0.81 ± 0.07 | 0.015          |
| <i>Aldoc</i>   | 1.00 ± 0.19 | 0.74 ± 0.26 | 0.729          | 0.57 ± 0.27 | 0.554          |
| <i>Aqp7</i>    | 1.00 ± 0.13 | 2.86 ± 0.48 | 0.002*         | 1.20 ± 0.24 | 0.649          |
| <i>Ccr5</i>    | 1.00 ± 0.13 | 0.79 ± 0.09 | 0.250          | 1.32 ± 0.14 | 0.160          |
| <i>Dusp18</i>  | 1.00 ± 0.03 | 0.77 ± 0.04 | 0.029*         | 0.93 ± 0.07 | 0.367          |
| <i>Dusp4</i>   | 1.00 ± 0.14 | 8.84 ± 1.67 | <0.001*        | 0.97 ± 0.12 | 0.979          |
| <i>Fads1</i>   | 1.00 ± 0.18 | 0.82 ± 0.28 | 0.591          | 0.50 ± 0.20 | 0.327          |
| <i>Fads2</i>   | 1.00 ± 0.21 | 0.89 ± 0.31 | 0.751          | 0.48 ± 0.21 | 0.396          |
| <i>Fgf21</i>   | 1.00 ± 0.04 | 1.84 ± 0.23 | 0.003*         | 0.85 ± 0.11 | 0.493          |
| <i>Gpr81</i>   | 1.00 ± 0.16 | 2.89 ± 0.59 | 0.006*         | 1.23 ± 0.18 | 0.656          |
| <i>Hmgcs2</i>  | 1.00 ± 0.20 | 0.87 ± 0.28 | 0.702          | 0.49 ± 0.23 | 0.379          |
| <i>Insig1</i>  | 1.00 ± 0.14 | 2.99 ± 0.40 | <0.001*        | 1.14 ± 0.24 | 0.731          |
| <i>Lbp</i>     | 1.00 ± 0.18 | 0.45 ± 0.15 | 0.299          | 0.79 ± 0.29 | 0.519          |
| <i>Ldha</i>    | 1.00 ± 0.05 | 1.62 ± 0.14 | 0.006*         | 1.02 ± 0.13 | 0.881          |
| <i>Lpin1</i>   | 1.00 ± 0.06 | 2.77 ± 0.29 | <0.001*        | 0.96 ± 0.11 | 0.874          |
| <i>Mif</i>     | 1.00 ± 0.11 | 1.11 ± 0.12 | 0.569          | 0.71 ± 0.14 | 0.222          |
| <i>Niban</i>   | 1.00 ± 0.05 | 0.85 ± 0.04 | 0.061          | 1.13 ± 0.05 | 0.059          |
| <i>Pc</i>      | 1.00 ± 0.11 | 2.55 ± 0.19 | <0.001*        | 0.72 ± 0.13 | 0.179          |
| <i>Pck1</i>    | 1.00 ± 0.19 | 2.60 ± 0.56 | 0.011*         | 0.95 ± 0.19 | 0.916          |
| <i>Pck2</i>    | 1.00 ± 0.11 | 1.26 ± 0.21 | 0.570          | 1.24 ± 0.12 | 0.476          |
| <i>Pde3b</i>   | 1.00 ± 0.12 | 2.47 ± 0.54 | 0.018*         | 1.12 ± 0.16 | 0.797          |
| <i>Pfkfb3</i>  | 1.00 ± 0.08 | 3.25 ± 1.03 | 0.048*         | 1.19 ± 0.21 | 0.821          |
| <i>Pik3r3</i>  | 1.00 ± 0.10 | 0.70 ± 0.09 | 0.386          | 0.74 ± 0.18 | 0.342          |
| <i>Prss15</i>  | 1.00 ± 0.05 | 1.32 ± 0.08 | 0.018*         | 0.89 ± 0.08 | 0.280          |
| <i>Retn</i>    | 1.00 ± 0.10 | 2.31 ± 0.41 | 0.005*         | 0.83 ± 0.17 | 0.643          |
| <i>Slc36a2</i> | 1.00 ± 0.13 | 5.97 ± 1.15 | <0.001*        | 1.30 ± 0.16 | 0.743          |
| <i>Stat5a</i>  | 1.00 ± 0.17 | 0.84 ± 0.24 | 0.618          | 0.60 ± 0.22 | 0.491          |
| <i>Tgfb3</i>   | 1.00 ± 0.18 | 0.77 ± 0.25 | 0.729          | 0.63 ± 0.21 | 0.563          |
| <i>Tshr</i>    | 1.00 ± 0.15 | 2.17 ± 0.38 | 0.017*         | 1.11 ± 0.19 | 0.766          |
| <i>Tnfrs21</i> | 1.00 ± 0.16 | 0.60 ± 0.17 | 0.444          | 0.74 ± 0.23 | 0.580          |

Values are expressed as the fold-change compared to CF rats and analyzed by One-way ANOVA.

\*Significantly different compared to CF rats;  $p < 0.05$ .
