# Supplementary material
Source: publisher figshare collection journal article supplement (https://karger.figshare.com/articles/dataset/_/5123644)
Supplement: Supplementary file 3 [file 1]

Table S1a. TaqMan Primer-Probe Sets - Inguinal Adipose Tissue

| Gene Symbol    | Gene Name                                                        | Assay ID      |
|----------------|------------------------------------------------------------------|---------------|
| <i>Acacb</i>   | Acetyl-Coenzyme A carboxylase beta                               | Rn00588290_m1 |
| <i>Acly</i>    | ATP citrate lyase                                                | Rn00566411_m1 |
| <i>Aco2</i>    | Aconitase 2, mitochondrial                                       | Rn00577876_m1 |
| <i>Aldoc</i>   | Aldolase C, Fructose-bisphosphate                                | Rn00560693_m1 |
| <i>Aqp7</i>    | Aquaporin                                                        | Rn00569727_m1 |
| <i>Ccr5</i>    | Chemokine (C-C motif) receptor 5                                 | Rn00588629_m1 |
| <i>Dusp18</i>  | Dual specificity phosphatase 18                                  | Rn01443563_s1 |
| <i>Dusp4</i>   | Dual specificity phosphatase 4                                   | Rn00573501_m1 |
| <i>Fads1</i>   | Fatty acid desaturase 1                                          | Rn00584915_m1 |
| <i>Fads2</i>   | Fatty acid desaturase 2                                          | Rn00580220_m1 |
| <i>Fam129</i>  | Family with sequence similarity 129, member A                    | Rn00573778_m1 |
| <i>Fgf21</i>   | Fibroblast growth factor 21                                      | Rn00590706_m1 |
| <i>Gpr81</i>   | G protein-coupled receptor 81                                    | Rn03037047-sH |
| <i>Hmgcs2</i>  | 3-Hydroxy-3-methylglutaryl-Coenzyme A synthase 2 (mitochondrial) | Rn00597339_m1 |
| <i>Insig1</i>  | Insulin induced gene 1                                           | Rn00574380_m1 |
| <i>Lbp</i>     | Lipopolysaccharide binding protein                               | Rn00567985_m1 |
| <i>Ldha</i>    | Lactate dehydrogenase A                                          | Rn00820751_g1 |
| <i>Lonp1</i>   | Lon peptidase1, mitochondrial                                    | Rn00591446_m1 |
| <i>Lpin1</i>   | Lipin 1                                                          | Rn01469026_m1 |
| <i>Mif</i>     | Macrophage inhibitory factor                                     | Rn00821234_g1 |
| <i>Pc</i>      | Pyruvate carboxylase                                             | Rn00562634_m1 |
| <i>Pck1</i>    | Phosphoenolpyruvate carboxykinase 1 (soluble)                    | Rn01529014_m1 |
| <i>Pck2</i>    | Phosphoenolpyruvate carboxykinase 2 (mitochondrial)              | Rn03648110_m1 |
| <i>Pde3b</i>   | Phosphodiesterase 3B, cGMP-inhibited                             | Rn00568191_m1 |
| <i>Pfkfb3</i>  | 6-Phosphofructo-2-kinase/fructose-2,6-biphosphatase 3            | Rn00589179_m1 |
| <i>Pik3r3</i>  | Phosphoinositide-3-kinase. Regulatory subunit 3 (gamma)          | Rn00573586_m1 |
| <i>Retn</i>    | Resistin                                                         | Rn00595224_m1 |
| <i>Slc36a2</i> | Solute carrier family 36 (proton/amino acid symporter), member 2 | Rn00595142_m1 |
| <i>Stat5a</i>  | Signal transducer and activator of transcription 5A              | Rn00567011_m1 |
| <i>Tgfb3</i>   | Transforming growth factor, beta 3                               | Rn00565937_m1 |
| <i>Tshr</i>    | Thyroid stimulating hormone receptor                             | Rn00563612_m1 |
| <i>Tnfrs21</i> | Tumor necrosis factor receptor superfamily, member 21            | Rn01757170_m1 |

Table S1b. TaqMan Primer-Probe Sets – Liver

| Gene Symbol    | Gene Name                                                                                                                            | Assay ID       |
|----------------|--------------------------------------------------------------------------------------------------------------------------------------|----------------|
| <i>Agpat9</i>  | 1-Acylglycerol-3-phosphate O-acyltransferase 9                                                                                       | Rn01450155_m1  |
| <i>Aqp8</i>    | Aquaporin 8                                                                                                                          | Rn00569732_m1  |
| <i>Asus</i>    | Asparagine synthetase                                                                                                                | Rn00565180_m1  |
| <i>Atf3</i>    | Activating transcription factor 3                                                                                                    | Rn00563784_m1  |
| <i>Atf4</i>    | Activating transcription factor 4 (tax-responsive enhancer element B67)                                                              | Rn00824644_g1  |
| <i>Atf6</i>    | Activating transcription factor 6                                                                                                    | Rn01490854_m1  |
| <i>Bhmt</i>    | Betaine-homocysteine methyltransferase                                                                                               | Rn00578255_m1  |
| <i>Cbs</i>     | Cystathionine beta synthase                                                                                                          | Rn00560948_m1  |
| <i>CD36</i>    | CD36 molecule (thrombospondin receptor)                                                                                              | Rn01442639_m1  |
| <i>Cebpb</i>   | CCAAT/enhancer binding protein (C/EBP), beta                                                                                         | Rn00824635_s1  |
| <i>Crot</i>    | Carnitine O-octanoyltransferase                                                                                                      | Rn00583174_m1  |
| <i>Ctps</i>    | CTP synthase                                                                                                                         | Rn00516751_m1  |
| <i>Cxcl12</i>  | Chemokine (C-X-C motif) ligand 12 (stromal cell-derived factor 1)                                                                    | Rn00573260_m1  |
| <i>Cyp17a1</i> | Cytochrome P450, family 17, subfamily a, polypeptide 1                                                                               | Rn00562601_m1  |
| <i>Dut</i>     | Deoxyuridine triphosphatase                                                                                                          | Rn00585902_m1  |
| <i>Eif2ak3</i> | Eukaryotic translation initiation factor 2 $\alpha$ kinase 3                                                                         | Rn00581002_m1  |
| <i>Eif2ak4</i> | Eukaryotic translation initiation factor 2 $\alpha$ kinase 4                                                                         | Rn01484206_m1  |
| <i>Eif2s1</i>  | Eukaryotic translation initiation factor 2, subunit 1 alpha                                                                          | Rn00820979_g1  |
| <i>Elovl2</i>  | Elongation of very long chain fatty acids (FEN1/Elo2, SUR4/Elo3, yeast)-like 2                                                       | Rn01450663_m1  |
| <i>Elovl5</i>  | ELOVL family member 5, elongation of long chain fatty acids (yeast)                                                                  | Rn01446631_m1  |
| <i>Fgf1</i>    | Fibroblast growth factor 1                                                                                                           | Rn00563362_m1  |
| <i>Fzd4</i>    | Frizzled homolog 4 (Drosophila)                                                                                                      | Rn00433382_m1  |
| <i>Gadd45a</i> | Growth arrest and DNA-damage-inducible, alpha                                                                                        | Rn00577049_m1  |
| <i>Gas5</i>    | Growth arrest specific 5                                                                                                             | Rn01497988_g1  |
| <i>Gck</i>     | Glucokinase                                                                                                                          | Rn00561265_m1  |
| <i>Gclm</i>    | Glutamate cysteine ligase, modifier subunit                                                                                          | Rn00568900_m1  |
| <i>Gldc</i>    | Glycine dehydrogenase (decarboxylating)                                                                                              | Rn015017661_m1 |
| <i>Gss</i>     | Glutathione synthetase                                                                                                               | Rn00564188_m1  |
| <i>Gsta3</i>   | Glutathione S-transferase A3                                                                                                         | Rn04223027_m1  |
| <i>Gstm2</i>   | Glutathione S-transferase mu 2                                                                                                       | Rn00598597_m1  |
| <i>Gstm3</i>   | Glutathione S-transferase mu 3                                                                                                       | Rn01789233_m1  |
| <i>Hadhb</i>   | Hydroxyacyl-Coenzyme A dehydrogenase/3-Ketoacyl-Coenzyme A thiolase/Enoyl-Coenzyme A hydratase (trifunctional protein), beta subunit | Rn00592435_m1  |
| <i>Igfals</i>  | Insulin-like growth factor binding protein, acid labile subunit                                                                      | Rn02132937_s1  |
| <i>Igfbp1</i>  | Insulin-like growth factor binding protein 1                                                                                         | Rn00565713_m1  |
| <i>Lars</i>    | Leucyl-tRNA synthetase                                                                                                               | Rn01406626_m1  |
| <i>Lipc</i>    | Lipase, hepatic                                                                                                                      | Rn00561474_m1  |

|                 |                                                                                                                                         |               |
|-----------------|-----------------------------------------------------------------------------------------------------------------------------------------|---------------|
| <i>Mat1a</i>    | Methionine adenosyltransferase I, alpha                                                                                                 | Rn00563454_m1 |
| <i>Mcee</i>     | Methylmalonyl CoA epimerase                                                                                                             | Rn01478033_m1 |
| <i>Me1</i>      | Malic enzyme 1, NADP(+)-dependent, cytosolic                                                                                            | Rn00561502_m1 |
| <i>Mthfd1</i>   | Methylenetetrahydrofolate dehydrogenase (NADP+ dependent) 1, Methenyltetrahydrofolate cyclohydrolase, formyltetrahydrofolate synthetase | Rn00574600_m1 |
| <i>Mthfd2</i>   | Methylenetetrahydrofolate dehydrogenase (NADP+ dependent) 2, Methenyltetrahydrofolate cyclohydrolase                                    | Rn01425878_g1 |
| <i>Mthfr</i>    | Methylenetetrahydrofolate reductase (NAD(P)H)                                                                                           | Rn01515583_m1 |
| <i>Mtr</i>      | 5-Methyltetrahydrofolate-homocysteine methyltransferase                                                                                 | Rn00578368_m1 |
| <i>Mybbp1a</i>  | MYB binding protein (P160) 1a                                                                                                           | Rn00581478_m1 |
| <i>Nox4</i>     | NADPH oxidase 4                                                                                                                         | Rn00585380_m1 |
| <i>Odc1</i>     | Ornithine decarboxylase 1                                                                                                               | Rn01469808_g1 |
| <i>Pbsn</i>     | Probasin                                                                                                                                | Rn00569425_m1 |
| <i>Pck1</i>     | Phosphoenolpyruvate carboxykinase 1 (soluble)                                                                                           | Rn01529014_m1 |
| <i>Pck2</i>     | Phosphoenolpyruvate carboxykinase 2 (mitochondrial)                                                                                     | Rn03648110_m1 |
| <i>Phgdh</i>    | Phosphoglycerate dehydrogenase                                                                                                          | Rn00821347_g1 |
| <i>Pik3c3</i>   | Phosphoinositide-3-kinase, class3                                                                                                       | Rn00576314_m1 |
| <i>Pklr</i>     | Pyruvate kinase, liver and RBC                                                                                                          | Rn01455286_m1 |
| <i>Pnpla3</i>   | Patatin-like phospholipase domain containing 3                                                                                          | Rn01502361_m1 |
| <i>Ppp1r3b</i>  | Protein phosphatase 1, regulatory (inhibitor) subunit 3B                                                                                | Rn01482776_s1 |
| <i>Slc16a10</i> | Solute carrier family 16 (monocarboxylic acid transporters), member 10                                                                  | Rn00593684_m1 |
| <i>Slc25a21</i> | Solute carrier family 25 (mitochondrial oxodicarboxylate carrier), member 21                                                            | Rn00592418_m1 |
| <i>Slc38a2</i>  | Solute carrier family 38, member 2                                                                                                      | Rn00710421_m1 |
| <i>Slc6a6</i>   | Solute carrier family 6 (neurotransmitter transporter, taurine), member 6                                                               | Rn00567962_m1 |
| <i>Slc7a1</i>   | Solute carrier family 7 (cationic amino-acid transporter, y+system), member 1                                                           | Rn00565399_m1 |
| <i>Srm</i>      | Spermine synthase                                                                                                                       | Rn00821456_g1 |
| <i>Tat</i>      | Tyrosine aminotransferase                                                                                                               | Rn01431532_m1 |
| <i>Tnfrsf21</i> | Tumor necrosis factor receptor superfamily, member 21                                                                                   | Rn01757170_m1 |
| <i>Trib3</i>    | Tribbles homolog 3 (Drosophila)                                                                                                         | Rn00595314_m1 |
| <i>Umps</i>     | Uridine monophosphate synthetase                                                                                                        | Rn01475102_m1 |
| <i>Vldlr</i>    | Very low density lipoprotein receptor                                                                                                   | Rn01498163_m1 |
