# Supplementary material
Source: publisher figshare collection journal article supplement (https://karger.figshare.com/articles/dataset/_/5123644)
Supplement: Supplementary file 4 [file 1]

| <b>Table S8. Heat map of statistically significant biochemicals profiled in serum.</b> Shaded cells indicate $p \leq 0.05$ ( <b>red</b> indicates that the mean values are significantly higher for that comparison; <b>green</b> values significantly lower). <b>Blue-bolded</b> text indicates $0.05 < p < 0.10$ . |                                     |               | Fold of Change             |                       |                       |
|----------------------------------------------------------------------------------------------------------------------------------------------------------------------------------------------------------------------------------------------------------------------------------------------------------------------|-------------------------------------|---------------|----------------------------|-----------------------|-----------------------|
|                                                                                                                                                                                                                                                                                                                      |                                     |               | Welch's Two Sample t-Tests |                       |                       |
| PATHWAY SORT                                                                                                                                                                                                                                                                                                         | BIOCHEMICAL NAME                    | SUPER PATHWAY | <u>MR</u><br>CF            | <u>MR + CYS</u><br>CF | <u>MR</u><br>MR + CYS |
| 1                                                                                                                                                                                                                                                                                                                    | glycine                             | Amino acid    | 0.82                       | 0.69                  | 1.2                   |
| 3                                                                                                                                                                                                                                                                                                                    | dimethylglycine                     | Amino acid    | 1.37                       | 0.82                  | 1.66                  |
| 4                                                                                                                                                                                                                                                                                                                    | N-acetyl glycine                    | Amino acid    | 1.17                       | 1.00                  | 1.17                  |
| 7                                                                                                                                                                                                                                                                                                                    | serine                              | Amino acid    | 2.70                       | 0.86                  | 3.14                  |
| 16                                                                                                                                                                                                                                                                                                                   | threonine                           | Amino acid    | 2.52                       | 0.75                  | 3.39                  |
| 17                                                                                                                                                                                                                                                                                                                   | N-acetylthreonine                   | Amino acid    | 2.84                       | 0.96                  | 2.97                  |
| 21                                                                                                                                                                                                                                                                                                                   | betaine                             | Amino acid    | 0.71                       | 0.88                  | 0.81                  |
| 23                                                                                                                                                                                                                                                                                                                   | alanine                             | Amino acid    | 0.69                       | 0.72                  | 0.95                  |
| 27                                                                                                                                                                                                                                                                                                                   | N-acetyl-beta-alanine               | Amino acid    | 1.26                       | 1.09                  | 1.16                  |
| 29                                                                                                                                                                                                                                                                                                                   | aspartate                           | Amino acid    | 2.12                       | 0.67                  | 3.18                  |
| 33                                                                                                                                                                                                                                                                                                                   | asparagine                          | Amino acid    | 0.82                       | 0.88                  | 0.94                  |
| 36                                                                                                                                                                                                                                                                                                                   | 3-ureidopropionate                  | Amino acid    | 0.86                       | 2.68                  | 0.32                  |
| 38                                                                                                                                                                                                                                                                                                                   | glutamate                           | Amino acid    | 0.77                       | 0.68                  | 1.13                  |
| 42                                                                                                                                                                                                                                                                                                                   | glutamine                           | Amino acid    | 1.47                       | 1.18                  | 1.25                  |
| 43                                                                                                                                                                                                                                                                                                                   | pyroglutamine*                      | Amino acid    | 0.83                       | 0.91                  | 0.91                  |
| 48                                                                                                                                                                                                                                                                                                                   | histidine                           | Amino acid    | 1.55                       | 0.74                  | 2.1                   |
| 51                                                                                                                                                                                                                                                                                                                   | 3-methylhistidine                   | Amino acid    | 0.61                       | 1.09                  | 0.56                  |
| 66                                                                                                                                                                                                                                                                                                                   | lysine                              | Amino acid    | 1.16                       | 0.93                  | 1.25                  |
| 69                                                                                                                                                                                                                                                                                                                   | pipecolate                          | Amino acid    | 0.98                       | 1.16                  | 0.84                  |
| 77                                                                                                                                                                                                                                                                                                                   | phenyllactate (PLA)                 | Amino acid    | 0.07                       | 0.29                  | 0.24                  |
| 78                                                                                                                                                                                                                                                                                                                   | phenylalanine                       | Amino acid    | 0.94                       | 0.93                  | 1.01                  |
| 80                                                                                                                                                                                                                                                                                                                   | phenylacetate                       | Amino acid    | 0.51                       | 0.69                  | 0.75                  |
| 82                                                                                                                                                                                                                                                                                                                   | p-cresol sulfate                    | Amino acid    | 0.73                       | 5.29                  | 0.14                  |
| 90                                                                                                                                                                                                                                                                                                                   | tyrosine                            | Amino acid    | 0.41                       | 0.96                  | 0.43                  |
| 91                                                                                                                                                                                                                                                                                                                   | 3-(4-hydroxyphenyl)lactate          | Amino acid    | 0.37                       | 1.00                  | 0.37                  |
| 97                                                                                                                                                                                                                                                                                                                   | 4-hydroxyphenylpyruvate             | Amino acid    | 2.15                       | 0.59                  | 3.66                  |
| 111                                                                                                                                                                                                                                                                                                                  | N-acetylphenylalanine               | Amino acid    | 0.69                       | 0.69                  | 1.01                  |
| 112                                                                                                                                                                                                                                                                                                                  | N-acetyltyrosine                    | Amino acid    | 0.40                       | 0.84                  | 0.48                  |
| 114                                                                                                                                                                                                                                                                                                                  | phenylacetyl glycine                | Amino acid    | 0.21                       | 0.78                  | 0.27                  |
| 119                                                                                                                                                                                                                                                                                                                  | 3-phenylpropionate (hydrocinnamate) | Amino acid    | 1.21                       | 0.67                  | 1.79                  |
| 121                                                                                                                                                                                                                                                                                                                  | phenol sulfate                      | Amino acid    | 0.21                       | 0.73                  | 0.29                  |
| 125                                                                                                                                                                                                                                                                                                                  | kynurenine                          | Amino acid    | 0.45                       | 1.06                  | 0.42                  |
| 126                                                                                                                                                                                                                                                                                                                  | tryptophan                          | Amino acid    | 0.71                       | 1.00                  | 0.7                   |
| 127                                                                                                                                                                                                                                                                                                                  | indolelactate                       | Amino acid    | 0.25                       | 0.45                  | 0.56                  |
| 129                                                                                                                                                                                                                                                                                                                  | indoleacetate                       | Amino acid    | 0.52                       | 0.58                  | 0.89                  |
| 138                                                                                                                                                                                                                                                                                                                  | serotonin (5HT)                     | Amino acid    | 1.59                       | 0.76                  | 2.1                   |
| 139                                                                                                                                                                                                                                                                                                                  | N-acetyltryptophan                  | Amino acid    | 1.03                       | 0.95                  | 1.08                  |
| 141                                                                                                                                                                                                                                                                                                                  | C-glycosyltryptophan*               | Amino acid    | 0.81                       | 1.15                  | 0.7                   |
| 147                                                                                                                                                                                                                                                                                                                  | 3-indoxyl sulfate                   | Amino acid    | 0.17                       | 0.85                  | 0.2                   |
| 148                                                                                                                                                                                                                                                                                                                  | indolepropionate                    | Amino acid    | 0.54                       | 0.44                  | 1.23                  |
| 149                                                                                                                                                                                                                                                                                                                  | 3-methyl-2-oxobutyrate              | Amino acid    | 1.25                       | 0.87                  | 1.44                  |
| 150                                                                                                                                                                                                                                                                                                                  | 3-methyl-2-oxovalerate              | Amino acid    | 0.86                       | 0.86                  | 1                     |
| 155                                                                                                                                                                                                                                                                                                                  | beta-hydroxyisovalerate             | Amino acid    | 0.90                       | 0.66                  | 1.36                  |
| 157                                                                                                                                                                                                                                                                                                                  | isoleucine                          | Amino acid    | 0.95                       | 0.93                  | 1.03                  |
| 158                                                                                                                                                                                                                                                                                                                  | leucine                             | Amino acid    | 1.05                       | 0.92                  | 1.14                  |
| 162                                                                                                                                                                                                                                                                                                                  | N-acetyl leucine                    | Amino acid    | 1.72                       | 0.90                  | 1.91                  |
| 164                                                                                                                                                                                                                                                                                                                  | N-acetyl isoleucine                 | Amino acid    | 1.68                       | 0.78                  | 2.14                  |

|     |                                |              |       |      |       |
|-----|--------------------------------|--------------|-------|------|-------|
| 167 | valine                         | Amino acid   | 1.06  | 0.89 | 1.19  |
| 168 | 2-hydroxyisobutyrate           | Amino acid   | 1.73  | 1.16 | 1.49  |
| 170 | 4-methyl-2-oxopentanoate       | Amino acid   | 1.20  | 0.90 | 1.32  |
| 175 | alpha-hydroxyisovalerate       | Amino acid   | 2.55  | 0.75 | 3.38  |
| 176 | isovalerylglycine              | Amino acid   | 0.64  | 0.48 | 1.34  |
| 177 | isobutyrylcarnitine            | Amino acid   | 0.79  | 0.78 | 1.02  |
| 179 | 2-methylbutyroylcarnitine      | Amino acid   | 0.46  | 0.99 | 0.46  |
| 181 | isovalerylcarnitine            | Amino acid   | 0.69  | 0.74 | 0.93  |
| 188 | cysteine                       | Amino acid   | 0.77  | 0.95 | 0.81  |
| 191 | cystine                        | Amino acid   | 0.80  | 1.28 | 0.63  |
| 199 | methionine                     | Amino acid   | 0.26  | 0.37 | 0.7   |
| 201 | N-acetylmethionine             | Amino acid   | 0.39  | 0.28 | 1.4   |
| 203 | 2-hydroxybutyrate (AHB)        | Amino acid   | 1.31  | 0.51 | 2.56  |
| 212 | dimethylarginine (SDMA + ADMA) | Amino acid   | 1.50  | 1.59 | 0.95  |
| 213 | arginine                       | Amino acid   | 1.06  | 0.86 | 1.24  |
| 216 | ornithine                      | Amino acid   | 2.15  | 0.87 | 2.48  |
| 217 | urea                           | Amino acid   | 1.39  | 1.07 | 1.29  |
| 218 | proline                        | Amino acid   | 1.13  | 1.00 | 1.13  |
| 220 | citrulline                     | Amino acid   | 0.87  | 0.86 | 1.01  |
| 224 | trans-4-hydroxyproline         | Amino acid   | 0.50  | 1.01 | 0.5   |
| 232 | creatine                       | Amino acid   | 1.38  | 1.07 | 1.29  |
| 233 | creatinine                     | Amino acid   | 0.89  | 1.04 | 0.85  |
| 235 | 2-aminobutyrate                | Amino acid   | 1.27  | 0.61 | 2.07  |
| 246 | 4-guanidinobutanoate           | Amino acid   | 1.12  | 0.71 | 1.58  |
| 253 | 5-oxoproline                   | Amino acid   | 8.12  | 1.10 | 7.4   |
| 254 | glutathione, oxidized (GSSG)   | Amino acid   | 0.73  | 0.67 | 1.09  |
| 255 | cysteine-glutathione disulfide | Amino acid   | 0.67  | 0.93 | 0.72  |
| 256 | ophthalmate                    | Amino acid   | 13.38 | 0.82 | 16.26 |
| 272 | alanylalanine                  | Peptide      | 0.58  | 0.88 | 0.66  |
| 298 | pro-hydroxy-pro                | Peptide      | 0.88  | 1.24 | 0.71  |
| 321 | gamma-glutamylvaline           | Peptide      | 1.65  | 0.96 | 1.72  |
| 323 | gamma-glutamylleucine          | Peptide      | 1.38  | 1.03 | 1.34  |
| 324 | gamma-glutamylisoleucine*      | Peptide      | 1.25  | 1.01 | 1.24  |
| 327 | gamma-glutamylmethionine       | Peptide      | 0.25  | 0.47 | 0.53  |
| 329 | gamma-glutamylglutamine        | Peptide      | 1.18  | 1.23 | 0.96  |
| 331 | gamma-glutamylphenylalanine    | Peptide      | 0.82  | 0.92 | 0.89  |
| 332 | gamma-glutamyltyrosine         | Peptide      | 0.45  | 1.17 | 0.39  |
| 333 | gamma-glutamylthreonine*       | Peptide      | 4.24  | 0.81 | 5.22  |
| 336 | gamma-glutamylalanine          | Peptide      | 0.90  | 1.05 | 0.86  |
| 352 | ADTGTTSEFXEAGGDXR*             | Peptide      | 0.50  | 0.89 | 0.57  |
| 359 | TDSDKVDXSXAR*                  | Peptide      | 0.79  | 0.94 | 0.84  |
| 360 | TTSDKVDXSXAR*                  | Peptide      | 0.65  | 1.11 | 0.58  |
| 361 | ATTSDKVDXSXA*                  | Peptide      | 0.57  | 0.83 | 0.69  |
| 362 | TTSDKVDXSXA*                   | Peptide      | 1.24  | 0.90 | 1.38  |
| 363 | ATTSDKVDXSXAR*                 | Peptide      | 0.28  | 0.82 | 0.34  |
| 365 | SDKVDXSXA*                     | Peptide      | 0.79  | 0.93 | 0.85  |
| 372 | erythronate*                   | Carbohydrate | 1.33  | 0.92 | 1.45  |
| 389 | fructose                       | Carbohydrate | 1.16  | 0.89 | 1.31  |
| 402 | mannose                        | Carbohydrate | 0.91  | 1.13 | 0.8   |
| 410 | sorbitol                       | Carbohydrate | 1.24  | 1.03 | 1.2   |
| 414 | sucrose                        | Carbohydrate | 0.84  | 0.81 | 1.03  |
| 430 | 1,5-anhydroglucitol (1,5-AG)   | Carbohydrate | 1.88  | 0.87 | 2.15  |
| 432 | glycerate                      | Carbohydrate | 0.65  | 1.01 | 0.65  |
| 436 | glucose                        | Carbohydrate | 0.79  | 1.00 | 0.79  |
| 450 | pyruvate                       | Carbohydrate | 0.24  | 0.57 | 0.41  |

|        |                                            |              |      |      |      |
|--------|--------------------------------------------|--------------|------|------|------|
| 451    | lactate                                    | Carbohydrate | 0.89 | 0.68 | 1.29 |
| 468    | ribose                                     | Carbohydrate | 1.42 | 0.88 | 1.61 |
| 479    | xylitol                                    | Carbohydrate | 1.94 | 0.87 | 2.23 |
| 491    | citrate                                    | Energy       | 1.26 | 0.82 | 1.53 |
| 500    | alpha-ketoglutarate                        | Energy       | 0.53 | 0.44 | 1.19 |
| 501    | succinate                                  | Energy       | 0.90 | 0.53 | 1.68 |
| 504    | fumarate                                   | Energy       | 0.78 | 0.58 | 1.34 |
| 507    | malate                                     | Energy       | 0.96 | 0.44 | 2.16 |
| 510    | acetylphosphate                            | Energy       | 0.74 | 0.72 | 1.04 |
| 511    | phosphate                                  | Energy       | 0.70 | 0.76 | 0.93 |
| 512    | pyrophosphate (PPi)                        | Energy       | 0.69 | 0.57 | 1.2  |
| 512.5  | linoleate (18:2n6)                         | Lipid        | 1.29 | 1.61 | 0.8  |
| 516    | linolenate [alpha or gamma; (18:3n3 or 6)] | Lipid        | 1.52 | 1.32 | 1.15 |
| 517    | dihomo-linolenate (20:3n3 or n6)           | Lipid        | 0.58 | 0.93 | 0.62 |
| 519    | docosapentaenoate (n3 DPA; 22:5n3)         | Lipid        | 1.68 | 2.35 | 0.72 |
| 520    | docosapentaenoate (n6 DPA; 22:5n6)         | Lipid        | 0.82 | 0.33 | 2.46 |
| 521    | docosahexaenoate (DHA; 22:6n3)             | Lipid        | 1.13 | 0.68 | 1.65 |
| 525    | caproate (6:0)                             | Lipid        | 0.87 | 1.08 | 0.81 |
| 526    | heptanoate (7:0)                           | Lipid        | 0.77 | 0.97 | 0.8  |
| 527    | caprylate (8:0)                            | Lipid        | 0.66 | 1.16 | 0.57 |
| 528    | pelargonate (9:0)                          | Lipid        | 0.70 | 1.03 | 0.68 |
| 529    | caprate (10:0)                             | Lipid        | 0.64 | 1.08 | 0.59 |
| 532    | laurate (12:0)                             | Lipid        | 0.70 | 0.93 | 0.75 |
| 535    | myristate (14:0)                           | Lipid        | 1.03 | 1.06 | 0.98 |
| 536    | myristoleate (14:1n5)                      | Lipid        | 1.02 | 1.04 | 0.98 |
| 538    | palmitate (16:0)                           | Lipid        | 1.19 | 1.18 | 1    |
| 539    | palmitoleate (16:1n7)                      | Lipid        | 1.46 | 1.20 | 1.22 |
| 541    | margarate (17:0)                           | Lipid        | 0.87 | 0.91 | 0.95 |
| 542    | 10-heptadecenoate (17:1n7)                 | Lipid        | 0.94 | 1.10 | 0.85 |
| 543    | stearate (18:0)                            | Lipid        | 1.10 | 1.01 | 1.09 |
| 545    | oleate (18:1n9)                            | Lipid        | 1.17 | 1.27 | 0.92 |
| 554    | 10-nonadecenoate (19:1n9)                  | Lipid        | 1.05 | 1.39 | 0.75 |
| 559    | eicosenoate (20:1n9 or 11)                 | Lipid        | 0.77 | 1.18 | 0.65 |
| 561    | dihomo-linoleate (20:2n6)                  | Lipid        | 0.85 | 1.19 | 0.72 |
| 565    | arachidonate (20:4n6)                      | Lipid        | 0.97 | 0.71 | 1.37 |
| 571    | adrenate (22:4n6)                          | Lipid        | 0.92 | 0.97 | 0.95 |
| 580    | palmitate, methyl ester                    | Lipid        | 0.44 | 1.31 | 0.34 |
| 604    | 2-hydroxypalmitate                         | Lipid        | 1.11 | 1.28 | 0.87 |
| 610    | 2-hydroxyglutarate                         | Lipid        | 0.94 | 0.98 | 0.96 |
| 615    | sebacate (decanedioate)                    | Lipid        | 1.61 | 1.02 | 1.57 |
| 616    | azelate (nonanedioate)                     | Lipid        | 1.56 | 0.97 | 1.6  |
| 617    | dodecanedioate                             | Lipid        | 1.29 | 1.08 | 1.2  |
| 618    | tetradecanedioate                          | Lipid        | 1.63 | 1.20 | 1.36 |
| 619    | hexadecanedioate                           | Lipid        | 1.54 | 0.91 | 1.7  |
| 620    | octadecanedioate                           | Lipid        | 1.84 | 0.96 | 1.92 |
| 621    | undecanedioate                             | Lipid        | 1.53 | 1.02 | 1.5  |
| 632.65 | methyl palmitate (15 or 2)                 | Lipid        | 0.98 | 1.08 | 0.91 |
| 632.7  | 17-methylstearate                          | Lipid        | 0.80 | 1.28 | 0.63 |
| 672    | 12-HETE                                    | Lipid        | 1.54 | 0.63 | 2.43 |
| 683    | propionylcarnitine                         | Lipid        | 0.74 | 0.89 | 0.83 |
| 685    | butyrylcarnitine                           | Lipid        | 0.24 | 0.94 | 0.26 |
| 689    | isovalerate                                | Lipid        | 0.65 | 1.08 | 0.61 |
| 691    | deoxycarnitine                             | Lipid        | 1.45 | 1.10 | 1.32 |
| 692    | carnitine                                  | Lipid        | 0.86 | 1.20 | 0.72 |
| 693    | 3-dehydrocarnitine*                        | Lipid        | 1.78 | 0.90 | 1.98 |

|       |                                           |       |      |      |      |
|-------|-------------------------------------------|-------|------|------|------|
| 694   | acetylcarnitine                           | Lipid | 1.14 | 0.98 | 1.17 |
| 696   | hexanoylcarnitine                         | Lipid | 1.21 | 1.18 | 1.02 |
| 709   | cholate                                   | Lipid | 1.34 | 1.20 | 1.12 |
| 710   | 12-dehydrocholate                         | Lipid | 0.76 | 0.49 | 1.56 |
| 712   | glycocholate                              | Lipid | 7.87 | 2.03 | 3.87 |
| 713   | taurocholate                              | Lipid | 0.06 | 1.83 | 0.03 |
| 718   | 3-dehydrocholate                          | Lipid | 2.32 | 1.47 | 1.58 |
| 719   | deoxycholate                              | Lipid | 1.46 | 0.68 | 2.16 |
| 720   | taurodeoxycholate                         | Lipid | 0.13 | 0.91 | 0.15 |
| 721   | glycodeoxycholate                         | Lipid | 9.28 | 1.41 | 6.59 |
| 734   | 6-beta-hydroxylithocholate                | Lipid | 2.47 | 0.59 | 4.19 |
| 736   | beta-muricholate                          | Lipid | 0.87 | 0.49 | 1.77 |
| 740   | alpha-muricholate                         | Lipid | 1.04 | 0.55 | 1.88 |
| 750   | glycerol                                  | Lipid | 1.03 | 1.14 | 0.91 |
| 751   | choline                                   | Lipid | 0.97 | 0.81 | 1.19 |
| 752   | glycerol 3-phosphate (G3P)                | Lipid | 0.27 | 0.87 | 0.31 |
| 753   | glycerophosphorylcholine (GPC)            | Lipid | 0.81 | 1.06 | 0.76 |
| 760   | myo-inositol                              | Lipid | 0.83 | 0.77 | 1.07 |
| 763   | inositol 1-phosphate (I1P)                | Lipid | 0.48 | 0.72 | 0.67 |
| 769   | 3-hydroxybutyrate (BHBA)                  | Lipid | 2.44 | 1.12 | 2.17 |
| 771   | 1,2-propanediol                           | Lipid | 1.27 | 0.89 | 1.43 |
| 775   | 1-palmitoylglycerophosphoethanolamine     | Lipid | 0.86 | 1.69 | 0.51 |
| 780   | 1-stearoylglycerophosphoethanolamine      | Lipid | 0.99 | 1.47 | 0.68 |
| 781   | 1-oleoylglycerophosphoethanolamine        | Lipid | 0.47 | 0.99 | 0.48 |
| 782   | 2-oleoylglycerophosphoethanolamine*       | Lipid | 0.54 | 1.08 | 0.5  |
| 783   | 1-linoleoylglycerophosphoethanolamine*    | Lipid | 0.56 | 1.19 | 0.47 |
| 784   | 2-linoleoylglycerophosphoethanolamine*    | Lipid | 0.59 | 1.34 | 0.44 |
| 785   | 1-arachidonoylglycerophosphoethanolamine* | Lipid | 0.91 | 1.43 | 0.64 |
| 786   | 2-arachidonoylglycerophosphoethanolamine* | Lipid | 1.07 | 1.70 | 0.63 |
| 791   | 1-myristoylglycerophosphocholine          | Lipid | 1.04 | 1.73 | 0.6  |
| 793   | 1-pentadecanoylglycerophosphocholine*     | Lipid | 1.00 | 1.31 | 0.77 |
| 794   | 1-palmitoylglycerophosphocholine          | Lipid | 1.02 | 1.08 | 0.94 |
| 795   | 2-palmitoylglycerophosphocholine*         | Lipid | 1.25 | 1.29 | 0.96 |
| 796   | 1-palmitoleoylglycerophosphocholine*      | Lipid | 0.57 | 1.51 | 0.38 |
| 798   | 1-heptadecanoylglycerophosphocholine      | Lipid | 0.86 | 0.96 | 0.89 |
| 799   | 1-stearoylglycerophosphocholine           | Lipid | 0.77 | 0.49 | 1.58 |
| 800   | 2-stearoylglycerophosphocholine*          | Lipid | 1.11 | 0.65 | 1.71 |
| 801   | 1-oleoylglycerophosphocholine             | Lipid | 0.83 | 1.07 | 0.78 |
| 802   | 2-oleoylglycerophosphocholine*            | Lipid | 1.14 | 1.93 | 0.59 |
| 803   | 1-linoleoylglycerophosphocholine          | Lipid | 1.02 | 1.24 | 0.82 |
| 804   | 2-linoleoylglycerophosphocholine*         | Lipid | 1.12 | 1.32 | 0.85 |
| 805   | 1-arachidoylglycerophosphocholine         | Lipid | 1.62 | 0.85 | 1.89 |
| 806   | 1-eicosadienoylglycerophosphocholine*     | Lipid | 1.08 | 1.22 | 0.88 |
| 807   | 1-eicosatrienoylglycerophosphocholine*    | Lipid | 0.54 | 1.90 | 0.28 |
| 809   | 1-arachidonoylglycerophosphocholine*      | Lipid | 0.84 | 0.89 | 0.95 |
| 810   | 2-arachidonoylglycerophosphocholine*      | Lipid | 0.80 | 1.18 | 0.67 |
| 811   | 1-docosapentaenoylglycerophosphocholine*  | Lipid | 0.64 | 0.24 | 2.65 |
| 813   | 1-docosaheptaenoylglycerophosphocholine*  | Lipid | 0.72 | 0.68 | 1.06 |
| 816   | 1-palmitoylglycerophosphoinositol*        | Lipid | 0.63 | 1.01 | 0.62 |
| 818   | 1-stearoylglycerophosphoinositol          | Lipid | 0.43 | 0.85 | 0.51 |
| 821   | 1-arachidonoylglycerophosphoinositol*     | Lipid | 0.43 | 0.75 | 0.58 |
| 825.5 | 1-palmitoylplasmaenylethanolamine*        | Lipid | 1.03 | 0.84 | 1.23 |
| 831   | 1-palmitoylglycerol (1-monopalmitin)      | Lipid | 0.44 | 1.37 | 0.32 |
| 833   | 1-stearoylglycerol (1-monostearin)        | Lipid | 0.65 | 0.69 | 0.94 |
| 864   | palmitoyl sphingomyelin                   | Lipid | 0.78 | 0.71 | 1.1  |

|        |                                                |                        |      |      |      |
|--------|------------------------------------------------|------------------------|------|------|------|
| 865    | stearoyl sphingomyelin                         | Lipid                  | 0.86 | 0.51 | 1.67 |
| 881    | cholesterol                                    | Lipid                  | 0.71 | 0.70 | 1.01 |
| 913    | corticosterone                                 | Lipid                  | 1.40 | 0.51 | 2.75 |
| 916    | beta-sitosterol                                | Lipid                  | 0.56 | 0.83 | 0.67 |
| 918    | campesterol                                    | Lipid                  | 0.69 | 1.00 | 0.69 |
| 919    | fucosterol                                     | Lipid                  | 0.85 | 1.03 | 0.83 |
| 934    | 7-alpha-hydroxy-3-oxo-4-cholestenoate (7-Hoca) | Lipid                  | 5.89 | 1.04 | 5.64 |
| 951    | inosine                                        | Nucleotide             | 3.37 | 1.00 | 3.37 |
| 958    | N1-methyladenosine                             | Nucleotide             | 0.95 | 1.14 | 0.83 |
| 994    | urate                                          | Nucleotide             | 1.31 | 0.85 | 1.55 |
| 995    | allantoin                                      | Nucleotide             | 1.15 | 0.94 | 1.22 |
| 997    | cytidine                                       | Nucleotide             | 1.06 | 1.08 | 0.98 |
| 999    | 5-methylcytidine                               | Nucleotide             | 1.17 | 1.00 | 1.18 |
| 1000   | N4-acetylcytidine                              | Nucleotide             | 2.57 | 1.48 | 1.74 |
| 1006   | 2'-deoxycytidine                               | Nucleotide             | 0.72 | 1.07 | 0.68 |
| 1011.5 | 5-methyl-2'-deoxycytidine                      | Nucleotide             | 1.07 | 1.27 | 0.84 |
| 1017   | thymidine                                      | Nucleotide             | 1.16 | 0.84 | 1.38 |
| 1022   | uracil                                         | Nucleotide             | 1.14 | 1.12 | 1.02 |
| 1023   | 5,6-dihydrouracil                              | Nucleotide             | 1.06 | 0.86 | 1.24 |
| 1024   | uridine                                        | Nucleotide             | 1.07 | 0.87 | 1.23 |
| 1025   | pseudouridine                                  | Nucleotide             | 1.19 | 1.01 | 1.19 |
| 1039   | gulono-1,4-lactone                             | Cofactors and vitamins | 1.74 | 1.61 | 1.08 |
| 1042   | threonate                                      | Cofactors and vitamins | 0.42 | 1.07 | 0.4  |
| 1055   | heme*                                          | Cofactors and vitamins | 0.87 | 2.30 | 0.38 |
| 1063   | nicotinamide                                   | Cofactors and vitamins | 3.32 | 1.12 | 2.96 |
| 1085   | pantothenate                                   | Cofactors and vitamins | 1.11 | 0.99 | 1.12 |
| 1105   | alpha-tocopherol                               | Cofactors and vitamins | 0.42 | 0.64 | 0.66 |
| 1123   | hippurate                                      | Xenobiotics            | 1.10 | 0.82 | 1.35 |
| 1135   | benzoate                                       | Xenobiotics            | 0.63 | 0.84 | 0.76 |
| 1151   | glycolate (hydroxyacetate)                     | Xenobiotics            | 0.83 | 0.81 | 1.03 |
| 1157   | glycerol 2-phosphate                           | Xenobiotics            | 0.36 | 0.79 | 0.46 |
| 1191   | 2-ethylhexanoate                               | Xenobiotics            | 0.33 | 0.89 | 0.37 |
| 1272   | tartarate                                      | Xenobiotics            | 0.59 | 0.78 | 0.75 |
| 1275   | indoleacrylate                                 | Xenobiotics            | 1.18 | 0.77 | 1.53 |
| 1360   | erythritol                                     | Xenobiotics            | 0.89 | 0.87 | 1.02 |
|        | X - 01497                                      | N/A                    | 0.60 | 0.95 | 0.64 |
|        | X - 02029                                      | N/A                    | 0.05 | 0.60 | 0.08 |
|        | X - 02973                                      | N/A                    | 0.92 | 0.98 | 0.94 |
|        | X - 03002                                      | N/A                    | 0.78 | 1.09 | 0.72 |
|        | X - 03003                                      | N/A                    | 1.25 | 1.05 | 1.19 |
|        | X - 03088                                      | N/A                    | 0.45 | 0.75 | 0.6  |
|        | X - 03094                                      | N/A                    | 0.66 | 0.66 | 1    |
|        | X - 03249                                      | N/A                    | 0.21 | 0.35 | 0.58 |
|        | X - 04357                                      | N/A                    | 0.95 | 0.48 | 2    |
|        | X - 04495                                      | N/A                    | 2.17 | 0.62 | 3.51 |
|        | X - 04498                                      | N/A                    | 1.24 | 0.72 | 1.73 |
|        | X - 04499                                      | N/A                    | 1.12 | 0.47 | 2.4  |
|        | X - 04807                                      | N/A                    | 1.49 | 0.81 | 1.85 |
|        | X - 04874                                      | N/A                    | 0.34 | 0.79 | 0.43 |
|        | X - 04987                                      | N/A                    | 0.67 | 0.69 | 0.97 |
|        | X - 06267                                      | N/A                    | 0.75 | 0.71 | 1.06 |
|        | X - 06306                                      | N/A                    | 0.24 | 0.22 | 1.12 |
|        | X - 09069                                      | N/A                    | 0.63 | 0.98 | 0.65 |
|        | X - 09706                                      | N/A                    | 0.87 | 1.18 | 0.74 |
|        | X - 10500                                      | N/A                    | 0.85 | 0.96 | 0.88 |

|  |           |     |      |      |      |
|--|-----------|-----|------|------|------|
|  | X - 10503 | N/A | 0.64 | 1.04 | 0.61 |
|  | X - 10505 | N/A | 0.74 | 1.31 | 0.56 |
|  | X - 10634 | N/A | 0.17 | 0.18 | 0.93 |
|  | X - 10964 | N/A | 3.57 | 0.93 | 3.86 |
|  | X - 11175 | N/A | 1.51 | 1.47 | 1.03 |
|  | X - 11204 | N/A | 1.14 | 0.98 | 1.16 |
|  | X - 11315 | N/A | 0.88 | 0.79 | 1.11 |
|  | X - 11327 | N/A | 1.22 | 1.20 | 1.01 |
|  | X - 11333 | N/A | 1.09 | 1.49 | 0.73 |
|  | X - 11334 | N/A | 1.15 | 0.70 | 1.64 |
|  | X - 11412 | N/A | 0.47 | 0.92 | 0.51 |
|  | X - 11533 | N/A | 0.78 | 0.90 | 0.87 |
|  | X - 11538 | N/A | 1.07 | 0.80 | 1.33 |
|  | X - 11542 | N/A | 1.02 | 1.00 | 1.02 |
|  | X - 11550 | N/A | 0.50 | 0.93 | 0.54 |
|  | X - 11593 | N/A | 0.39 | 0.54 | 0.73 |
|  | X - 11662 | N/A | 0.32 | 1.05 | 0.31 |
|  | X - 11687 | N/A | 0.80 | 0.86 | 0.93 |
|  | X - 11861 | N/A | 0.79 | 0.89 | 0.9  |
|  | X - 12051 | N/A | 0.85 | 1.33 | 0.64 |
|  | X - 12100 | N/A | 0.62 | 1.01 | 0.62 |
|  | X - 12110 | N/A | 0.85 | 1.23 | 0.69 |
|  | X - 12156 | N/A | 0.51 | 0.67 | 0.77 |
|  | X - 12205 | N/A | 0.93 | 0.85 | 1.09 |
|  | X - 12206 | N/A | 0.55 | 1.34 | 0.41 |
|  | X - 12216 | N/A | 0.61 | 0.76 | 0.8  |
|  | X - 12435 | N/A | 1.02 | 1.19 | 0.86 |
|  | X - 12439 | N/A | 0.43 | 0.77 | 0.56 |
|  | X - 12442 | N/A | 1.58 | 1.18 | 1.33 |
|  | X - 12478 | N/A | 2.37 | 0.44 | 5.38 |
|  | X - 12556 | N/A | 3.38 | 0.76 | 4.48 |
|  | X - 12627 | N/A | 0.82 | 0.58 | 1.42 |
|  | X - 12771 | N/A | 2.66 | 0.76 | 3.48 |
|  | X - 12776 | N/A | 1.32 | 1.05 | 1.26 |
|  | X - 12786 | N/A | 0.76 | 0.53 | 1.43 |
|  | X - 12801 | N/A | 1.47 | 1.28 | 1.15 |
|  | X - 13429 | N/A | 3.84 | 1.00 | 3.84 |
|  | X - 13452 | N/A | 1.61 | 0.92 | 1.74 |
|  | X - 13496 | N/A | 0.86 | 1.08 | 0.79 |
|  | X - 13505 | N/A | 1.65 | 1.00 | 1.65 |
|  | X - 13708 | N/A | 0.89 | 0.93 | 0.96 |
|  | X - 14567 | N/A | 0.42 | 0.77 | 0.54 |
|  | X - 14603 | N/A | 0.87 | 0.84 | 1.04 |
|  | X - 15011 | N/A | 0.47 | 0.71 | 0.66 |
|  | X - 15483 | N/A | 1.49 | 1.06 | 1.41 |
|  | X - 15624 | N/A | 0.86 | 1.04 | 0.83 |
|  | X - 15646 | N/A | 0.87 | 0.63 | 1.39 |
|  | X - 15649 | N/A | 2.22 | 0.80 | 2.78 |
|  | X - 15667 | N/A | 0.63 | 1.14 | 0.55 |
|  | X - 16206 | N/A | 0.99 | 1.03 | 0.96 |
|  | X - 16234 | N/A | 1.31 | 0.77 | 1.69 |
|  | X - 16243 | N/A | 1.08 | 0.54 | 1.99 |
|  | X - 16245 | N/A | 0.34 | 0.74 | 0.46 |
|  | X - 16480 | N/A | 0.81 | 0.72 | 1.12 |
|  | X - 16557 | N/A | 1.03 | 0.90 | 1.15 |

|  |           |     |       |      |       |
|--|-----------|-----|-------|------|-------|
|  | X - 16578 | N/A | 0.51  | 0.81 | 0.62  |
|  | X - 16595 | N/A | 0.75  | 1.10 | 0.68  |
|  | X - 16803 | N/A | 12.84 | 0.72 | 17.78 |
|  | X - 16819 | N/A | 1.83  | 0.35 | 5.24  |
|  | X - 16831 | N/A | 1.51  | 0.78 | 1.93  |
|  | X - 17010 | N/A | 0.97  | 0.91 | 1.07  |
|  | X - 17024 | N/A | 1.96  | 0.30 | 6.5   |
|  | X - 17160 | N/A | 0.83  | 0.94 | 0.88  |
|  | X - 17254 | N/A | 2.13  | 2.32 | 0.92  |
|  | X - 17269 | N/A | 0.63  | 0.90 | 0.7   |
