# Supplementary material
Source: publisher figshare collection journal article supplement (https://karger.figshare.com/articles/dataset/_/5123644)
Supplement: Supplementary file 5 [file 1]

| Table S9. Heat map of statistically significant biochemicals profiled in liver. Shaded cells indicate $p \leq 0.05$ ( <b>red</b> indicates that the mean values are significantly higher for that comparison; <b>green</b> values significantly lower). <b>Blue-bolded</b> text indicates $0.05 < p < 0.10$ . |                              |               | Fold of Change             |                       |                       |
|---------------------------------------------------------------------------------------------------------------------------------------------------------------------------------------------------------------------------------------------------------------------------------------------------------------|------------------------------|---------------|----------------------------|-----------------------|-----------------------|
|                                                                                                                                                                                                                                                                                                               |                              |               | Welch's Two Sample t-Tests |                       |                       |
| PATHWAY SORT                                                                                                                                                                                                                                                                                                  | BIOCHEMICAL NAME             | SUPER PATHWAY | <u>MR</u><br>CF            | <u>MR + CYS</u><br>CF | <u>MR</u><br>MR + CYS |
| 1                                                                                                                                                                                                                                                                                                             | glycine                      | Amino acid    | 0.71                       | 0.69                  | 1.02                  |
| 2                                                                                                                                                                                                                                                                                                             | sarcosine (N-Methylglycine)  | Amino acid    | 1.15                       | 0.40                  | 2.87                  |
| 3                                                                                                                                                                                                                                                                                                             | dimethylglycine              | Amino acid    | 1.33                       | 0.91                  | 1.46                  |
| 6                                                                                                                                                                                                                                                                                                             | beta-hydroxypyruvate         | Amino acid    | 0.67                       | 1.04                  | 0.64                  |
| 7                                                                                                                                                                                                                                                                                                             | serine                       | Amino acid    | 4.97                       | 0.95                  | 5.23                  |
| 16                                                                                                                                                                                                                                                                                                            | threonine                    | Amino acid    | 4.35                       | 0.74                  | 5.85                  |
| 18                                                                                                                                                                                                                                                                                                            | allo-threonine               | Amino acid    | 4.07                       | 1.12                  | 3.62                  |
| 21                                                                                                                                                                                                                                                                                                            | betaine                      | Amino acid    | 0.49                       | 0.91                  | 0.53                  |
| 22                                                                                                                                                                                                                                                                                                            | betaine aldehyde             | Amino acid    | 0.79                       | 1.52                  | 0.52                  |
| 23                                                                                                                                                                                                                                                                                                            | alanine                      | Amino acid    | 0.66                       | 0.88                  | 0.75                  |
| 24                                                                                                                                                                                                                                                                                                            | beta-alanine                 | Amino acid    | 0.99                       | 0.92                  | 1.07                  |
| 29                                                                                                                                                                                                                                                                                                            | aspartate                    | Amino acid    | 1.48                       | 1.39                  | 1.07                  |
| 33                                                                                                                                                                                                                                                                                                            | asparagine                   | Amino acid    | 0.55                       | 0.97                  | 0.57                  |
| 38                                                                                                                                                                                                                                                                                                            | glutamate                    | Amino acid    | 0.88                       | 1.05                  | 0.84                  |
| 42                                                                                                                                                                                                                                                                                                            | glutamine                    | Amino acid    | 1.26                       | 1.03                  | 1.23                  |
| 43                                                                                                                                                                                                                                                                                                            | pyroglutamine*               | Amino acid    | 2.01                       | 1.55                  | 1.29                  |
| 44                                                                                                                                                                                                                                                                                                            | gamma-aminobutyrate (GABA)   | Amino acid    | 1.14                       | 0.85                  | 1.34                  |
| 48                                                                                                                                                                                                                                                                                                            | histidine                    | Amino acid    | 0.93                       | 0.90                  | 1.03                  |
| 53                                                                                                                                                                                                                                                                                                            | histamine                    | Amino acid    | 0.65                       | 0.75                  | 0.87                  |
| 61                                                                                                                                                                                                                                                                                                            | glutarate (pentanedioate)    | Amino acid    | 1.04                       | 0.61                  | 1.71                  |
| 66                                                                                                                                                                                                                                                                                                            | lysine                       | Amino acid    | 0.84                       | 0.85                  | 0.98                  |
| 67                                                                                                                                                                                                                                                                                                            | 2-aminoadipate               | Amino acid    | 1.85                       | 1.06                  | 1.74                  |
| 69                                                                                                                                                                                                                                                                                                            | pipecolate                   | Amino acid    | 0.93                       | 1.06                  | 0.88                  |
| 73                                                                                                                                                                                                                                                                                                            | N2-acetyllysine              | Amino acid    | 0.99                       | 0.96                  | 1.03                  |
| 75                                                                                                                                                                                                                                                                                                            | glutaryl carnitine           | Amino acid    | 1.07                       | 0.58                  | 1.87                  |
| 78                                                                                                                                                                                                                                                                                                            | phenylalanine                | Amino acid    | 0.64                       | 0.94                  | 0.68                  |
| 90                                                                                                                                                                                                                                                                                                            | tyrosine                     | Amino acid    | 0.50                       | 0.93                  | 0.54                  |
| 114                                                                                                                                                                                                                                                                                                           | phenylacetyl glycine         | Amino acid    | 0.39                       | 1.26                  | 0.31                  |
| 125                                                                                                                                                                                                                                                                                                           | kynurenine                   | Amino acid    | 0.77                       | 0.90                  | 0.86                  |
| 126                                                                                                                                                                                                                                                                                                           | tryptophan                   | Amino acid    | 0.68                       | 0.97                  | 0.7                   |
| 141                                                                                                                                                                                                                                                                                                           | C-glycosyltryptophan*        | Amino acid    | 0.78                       | 0.92                  | 0.85                  |
| 157                                                                                                                                                                                                                                                                                                           | isoleucine                   | Amino acid    | 0.69                       | 0.89                  | 0.78                  |
| 158                                                                                                                                                                                                                                                                                                           | leucine                      | Amino acid    | 0.67                       | 0.89                  | 0.74                  |
| 167                                                                                                                                                                                                                                                                                                           | valine                       | Amino acid    | 0.73                       | 1.00                  | 0.73                  |
| 170                                                                                                                                                                                                                                                                                                           | 4-methyl-2-oxopentanoate     | Amino acid    | 1.04                       | 0.69                  | 1.52                  |
| 177                                                                                                                                                                                                                                                                                                           | isobutyrylcarnitine          | Amino acid    | 1.21                       | 0.43                  | 2.84                  |
| 179                                                                                                                                                                                                                                                                                                           | 2-methylbutyrylcarnitine     | Amino acid    | 0.50                       | 0.42                  | 1.18                  |
| 181                                                                                                                                                                                                                                                                                                           | isovaleryl carnitine         | Amino acid    | 1.24                       | 0.40                  | 3.09                  |
| 182                                                                                                                                                                                                                                                                                                           | hydroxyisovaleryl carnitine  | Amino acid    | 1.65                       | 0.98                  | 1.68                  |
| 188                                                                                                                                                                                                                                                                                                           | cysteine                     | Amino acid    | 0.53                       | 1.14                  | 0.47                  |
| 192                                                                                                                                                                                                                                                                                                           | cystathionine                | Amino acid    | 0.66                       | 0.54                  | 1.23                  |
| 195                                                                                                                                                                                                                                                                                                           | hypotaurine                  | Amino acid    | 0.09                       | 0.42                  | 0.2                   |
| 196                                                                                                                                                                                                                                                                                                           | taurine                      | Amino acid    | 0.10                       | 0.38                  | 0.26                  |
| 198                                                                                                                                                                                                                                                                                                           | S-adenosylhomocysteine (SAH) | Amino acid    | 1.45                       | 1.17                  | 1.25                  |
| 199                                                                                                                                                                                                                                                                                                           | methionine                   | Amino acid    | 0.59                       | 0.89                  | 0.67                  |
| 201                                                                                                                                                                                                                                                                                                           | N-acetylmethionine           | Amino acid    | 0.77                       | 0.79                  | 0.98                  |
| 203                                                                                                                                                                                                                                                                                                           | 2-hydroxybutyrate (AHB)      | Amino acid    | 0.92                       | 0.61                  | 1.51                  |
| 205                                                                                                                                                                                                                                                                                                           | homocysteine                 | Amino acid    | 2.66                       | 1.35                  | 1.97                  |

|     |                                |              |       |      |      |
|-----|--------------------------------|--------------|-------|------|------|
| 212 | dimethylarginine (SDMA + ADMA) | Amino acid   | 0.42  | 0.72 | 0.58 |
| 213 | arginine                       | Amino acid   | 1.67  | 0.99 | 1.68 |
| 216 | ornithine                      | Amino acid   | 1.06  | 0.97 | 1.09 |
| 217 | urea                           | Amino acid   | 1.23  | 0.89 | 1.39 |
| 218 | proline                        | Amino acid   | 0.71  | 0.94 | 0.76 |
| 221 | N-acetylornithine              | Amino acid   | 0.49  | 0.65 | 0.75 |
| 224 | trans-4-hydroxyproline         | Amino acid   | 0.62  | 1.01 | 0.61 |
| 232 | creatine                       | Amino acid   | 1.02  | 1.05 | 0.97 |
| 235 | 2-aminobutyrate                | Amino acid   | 3.18  | 1.19 | 2.68 |
| 238 | 5-methylthioadenosine (MTA)    | Amino acid   | 0.27  | 0.52 | 0.51 |
| 239 | putrescine                     | Amino acid   | 4.14  | 2.32 | 1.78 |
| 242 | spermidine                     | Amino acid   | 2.08  | 0.90 | 2.31 |
| 246 | 4-guanidinobutanoate           | Amino acid   | 0.38  | 0.58 | 0.65 |
| 251 | glutathione, reduced (GSH)     | Amino acid   | 0.08  | 0.56 | 0.15 |
| 252 | S-methylglutathione            | Amino acid   | 0.14  | 0.43 | 0.32 |
| 253 | 5-oxoproline                   | Amino acid   | 5.17  | 1.10 | 4.71 |
| 254 | glutathione, oxidized (GSSG)   | Amino acid   | 0.23  | 0.90 | 0.26 |
| 255 | cysteine-glutathione disulfide | Amino acid   | 0.76  | 1.75 | 0.43 |
| 256 | ophthalmate                    | Amino acid   | 18.20 | 1.83 | 9.95 |
| 261 | glycylvaline                   | Peptide      | 0.84  | 0.78 | 1.07 |
| 262 | glycylglycine                  | Peptide      | 0.61  | 0.95 | 0.64 |
| 264 | glycylproline                  | Peptide      | 0.36  | 0.64 | 0.56 |
| 266 | glycylleucine                  | Peptide      | 0.49  | 0.98 | 0.5  |
| 298 | pro-hydroxy-pro                | Peptide      | 0.66  | 0.99 | 0.67 |
| 305 | cysteinylglycine               | Peptide      | 0.18  | 0.70 | 0.26 |
| 321 | gamma-glutamylvaline           | Peptide      | 10.63 | 1.95 | 5.45 |
| 323 | gamma-glutamylleucine          | Peptide      | 7.74  | 1.60 | 4.83 |
| 324 | gamma-glutamylisoleucine*      | Peptide      | 4.81  | 1.30 | 3.7  |
| 333 | gamma-glutamylthreonine*       | Peptide      | 1.59  | 1.00 | 1.59 |
| 366 | glucosamine                    | Carbohydrate | 1.61  | 0.82 | 1.97 |
| 368 | N-acetylglucosamine            | Carbohydrate | 0.52  | 0.78 | 0.66 |
| 372 | erythronate*                   | Carbohydrate | 0.89  | 1.10 | 0.81 |
| 374 | N-acetylneuraminate            | Carbohydrate | 0.63  | 1.20 | 0.52 |
| 389 | fructose                       | Carbohydrate | 1.09  | 0.95 | 1.14 |
| 397 | maltose                        | Carbohydrate | 0.69  | 0.69 | 0.99 |
| 402 | mannose                        | Carbohydrate | 0.90  | 0.92 | 0.99 |
| 410 | sorbitol                       | Carbohydrate | 0.56  | 1.28 | 0.43 |
| 414 | sucrose                        | Carbohydrate | 1.00  | 1.00 | 1    |
| 415 | tagatose                       | Carbohydrate | 1.14  | 2.65 | 0.43 |
| 417 | maltotriose                    | Carbohydrate | 0.88  | 0.82 | 1.07 |
| 423 | maltotetraose                  | Carbohydrate | 1.08  | 0.88 | 1.22 |
| 425 | maltopentaose                  | Carbohydrate | 1.47  | 0.91 | 1.63 |
| 426 | maltohexaose                   | Carbohydrate | 2.02  | 0.94 | 2.14 |
| 430 | 1,5-anhydroglucitol (1,5-AG)   | Carbohydrate | 1.93  | 0.94 | 2.06 |
| 432 | glycerate                      | Carbohydrate | 1.54  | 0.83 | 1.87 |
| 436 | glucose                        | Carbohydrate | 0.80  | 1.01 | 0.79 |
| 444 | 3-phosphoglycerate             | Carbohydrate | 0.69  | 0.85 | 0.82 |
| 449 | phosphoenolpyruvate (PEP)      | Carbohydrate | 0.65  | 0.63 | 1.03 |
| 450 | pyruvate                       | Carbohydrate | 0.43  | 0.65 | 0.66 |
| 451 | lactate                        | Carbohydrate | 0.70  | 0.89 | 0.78 |
| 459 | 6-phosphogluconate             | Carbohydrate | 1.88  | 1.15 | 1.64 |
| 462 | ribitol                        | Carbohydrate | 0.71  | 0.88 | 0.81 |
| 466 | gluconate                      | Carbohydrate | 2.33  | 1.40 | 1.67 |
| 468 | ribose                         | Carbohydrate | 0.77  | 1.16 | 0.67 |
| 471 | ribose 5-phosphate             | Carbohydrate | 0.54  | 0.89 | 0.61 |

|        |                                            |              |      |      |      |
|--------|--------------------------------------------|--------------|------|------|------|
| 473    | ribulose                                   | Carbohydrate | 0.41 | 0.73 | 0.56 |
| 479    | xylitol                                    | Carbohydrate | 0.76 | 1.33 | 0.57 |
| 500    | alpha-ketoglutarate                        | Energy       | 0.75 | 0.67 | 1.12 |
| 501    | succinate                                  | Energy       | 1.61 | 1.07 | 1.51 |
| 504    | fumarate                                   | Energy       | 0.88 | 1.42 | 0.62 |
| 507    | malate                                     | Energy       | 0.89 | 1.42 | 0.63 |
| 510    | acetylphosphate                            | Energy       | 0.63 | 0.69 | 0.92 |
| 511    | phosphate                                  | Energy       | 0.88 | 0.88 | 0.99 |
| 512    | pyrophosphate (PPi)                        | Energy       | 0.85 | 0.71 | 1.19 |
| 512.5  | linoleate (18:2n6)                         | Lipid        | 1.01 | 1.52 | 0.67 |
| 516    | linolenate [alpha or gamma; (18:3n3 or 6)] | Lipid        | 1.87 | 1.33 | 1.4  |
| 517    | dihomo-linolenate (20:3n3 or n6)           | Lipid        | 1.28 | 1.57 | 0.82 |
| 518    | eicosapentaenoate (EPA; 20:5n3)            | Lipid        | 1.28 | 1.25 | 1.02 |
| 519    | docosapentaenoate (n3 DPA; 22:5n3)         | Lipid        | 1.60 | 1.69 | 0.95 |
| 520    | docosapentaenoate (n6 DPA; 22:5n6)         | Lipid        | 1.39 | 0.39 | 3.59 |
| 521    | docosahexaenoate (DHA; 22:6n3)             | Lipid        | 0.80 | 0.67 | 1.19 |
| 525    | caproate (6:0)                             | Lipid        | 1.79 | 0.57 | 3.12 |
| 527    | caprylate (8:0)                            | Lipid        | 0.72 | 1.08 | 0.67 |
| 528    | pelargonate (9:0)                          | Lipid        | 1.02 | 0.88 | 1.17 |
| 529    | caprate (10:0)                             | Lipid        | 0.92 | 0.93 | 0.99 |
| 532    | laurate (12:0)                             | Lipid        | 1.00 | 0.92 | 1.08 |
| 535    | myristate (14:0)                           | Lipid        | 0.75 | 1.21 | 0.62 |
| 536    | myristoleate (14:1n5)                      | Lipid        | 0.73 | 0.95 | 0.78 |
| 537    | pentadecanoate (15:0)                      | Lipid        | 0.82 | 0.99 | 0.83 |
| 538    | palmitate (16:0)                           | Lipid        | 0.85 | 1.11 | 0.76 |
| 539    | palmitoleate (16:1n7)                      | Lipid        | 0.52 | 1.06 | 0.49 |
| 541    | margarate (17:0)                           | Lipid        | 0.70 | 0.92 | 0.76 |
| 542    | 10-heptadecenoate (17:1n7)                 | Lipid        | 0.34 | 0.96 | 0.35 |
| 543    | stearate (18:0)                            | Lipid        | 0.88 | 0.84 | 1.05 |
| 545    | oleate (18:1n9)                            | Lipid        | 0.73 | 1.64 | 0.45 |
| 547    | cis-vaccenate (18:1n7)                     | Lipid        | 0.29 | 1.57 | 0.18 |
| 552    | stearidonate (18:4n3)                      | Lipid        | 3.17 | 1.68 | 1.89 |
| 553    | nonadecanoate (19:0)                       | Lipid        | 1.03 | 1.10 | 0.94 |
| 554    | 10-nonadecenoate (19:1n9)                  | Lipid        | 0.65 | 1.35 | 0.48 |
| 559    | eicosenoate (20:1n9 or 11)                 | Lipid        | 0.92 | 1.47 | 0.63 |
| 561    | dihomo-linoleate (20:2n6)                  | Lipid        | 0.95 | 1.71 | 0.55 |
| 564    | mead acid (20:3n9)                         | Lipid        | 1.43 | 0.96 | 1.49 |
| 565    | arachidonate (20:4n6)                      | Lipid        | 1.03 | 0.69 | 1.49 |
| 569    | docosadienoate (22:2n6)                    | Lipid        | 1.31 | 1.81 | 0.72 |
| 571    | adrenate (22:4n6)                          | Lipid        | 1.56 | 1.03 | 1.52 |
| 589    | n-Butyl Oleate                             | Lipid        | 0.88 | 1.08 | 0.81 |
| 591    | 4-hydroxybutyrate (GHB)                    | Lipid        | 1.17 | 0.53 | 2.21 |
| 604    | 2-hydroxypalmitate                         | Lipid        | 0.96 | 1.07 | 0.9  |
| 608    | 13-HODE + 9-HODE                           | Lipid        | 1.87 | 1.29 | 1.45 |
| 608.5  | 12,13-hydroxyoctadec-9(Z)-enoate           | Lipid        | 0.40 | 0.87 | 0.46 |
| 608.6  | 9,10-hydroxyoctadec-12(Z)-enoic acid       | Lipid        | 0.39 | 1.08 | 0.37 |
| 618    | tetradecanedioate                          | Lipid        | 0.67 | 0.61 | 1.1  |
| 619    | hexadecanedioate                           | Lipid        | 0.62 | 0.51 | 1.22 |
| 632.65 | methyl palmitate (15 or 2)                 | Lipid        | 0.77 | 0.90 | 0.85 |
| 632.7  | 17-methylstearate                          | Lipid        | 0.52 | 1.09 | 0.48 |
| 683    | propionylcarnitine                         | Lipid        | 0.75 | 1.23 | 0.61 |
| 685    | butyrylcarnitine                           | Lipid        | 0.31 | 1.59 | 0.2  |
| 690.5  | malonylcarnitine                           | Lipid        | 1.18 | 0.60 | 1.97 |
| 691    | deoxycarnitine                             | Lipid        | 0.66 | 0.68 | 0.97 |
| 692    | carnitine                                  | Lipid        | 0.73 | 0.63 | 1.16 |

|       |                                               |       |       |      |       |
|-------|-----------------------------------------------|-------|-------|------|-------|
| 693   | 3-dehydrocarnitine*                           | Lipid | 1.00  | 0.75 | 1.33  |
| 694   | acetylcarnitine                               | Lipid | 0.30  | 0.72 | 0.42  |
| 709   | cholate                                       | Lipid | 11.84 | 0.91 | 13.02 |
| 712   | glycocholate                                  | Lipid | 5.63  | 1.59 | 3.55  |
| 713   | taurocholate                                  | Lipid | 0.09  | 1.31 | 0.07  |
| 720   | taurodeoxycholate                             | Lipid | 0.09  | 0.83 | 0.11  |
| 721   | glycodeoxycholate                             | Lipid | 5.91  | 1.27 | 4.67  |
| 736   | beta-muricholate                              | Lipid | 5.67  | 0.76 | 7.47  |
| 738   | tauro-beta-muricholate                        | Lipid | 0.06  | 0.70 | 0.08  |
| 742.2 | tauroursodeoxycholate                         | Lipid | 0.09  | 0.61 | 0.14  |
| 744   | 1-octadecanol                                 | Lipid | 0.92  | 0.91 | 1.01  |
| 745   | choline phosphate                             | Lipid | 0.33  | 0.45 | 0.74  |
| 746   | ethanolamine                                  | Lipid | 0.93  | 2.69 | 0.34  |
| 747   | phosphoethanolamine                           | Lipid | 1.57  | 1.64 | 0.95  |
| 750   | glycerol                                      | Lipid | 0.64  | 1.30 | 0.49  |
| 751   | choline                                       | Lipid | 1.25  | 1.49 | 0.84  |
| 752   | glycerol 3-phosphate (G3P)                    | Lipid | 0.48  | 2.44 | 0.2   |
| 753   | glycerophosphorylcholine (GPC)                | Lipid | 0.42  | 2.24 | 0.19  |
| 760   | myo-inositol                                  | Lipid | 1.00  | 1.02 | 0.98  |
| 763   | inositol 1-phosphate (I1P)                    | Lipid | 0.76  | 0.74 | 1.02  |
| 769   | 3-hydroxybutyrate (BHBA)                      | Lipid | 1.17  | 0.98 | 1.19  |
| 775   | 1-palmitoylglycerophosphoethanolamine         | Lipid | 1.52  | 1.73 | 0.88  |
| 780   | 1-stearoylglycerophosphoethanolamine          | Lipid | 2.45  | 2.25 | 1.09  |
| 781   | 1-oleoylglycerophosphoethanolamine            | Lipid | 0.83  | 1.39 | 0.6   |
| 782   | 2-oleoylglycerophosphoethanolamine*           | Lipid | 0.35  | 0.71 | 0.49  |
| 783   | 1-linoleoylglycerophosphoethanolamine*        | Lipid | 0.94  | 1.99 | 0.47  |
| 784   | 2-linoleoylglycerophosphoethanolamine*        | Lipid | 0.72  | 1.59 | 0.45  |
| 785   | 1-arachidonoylglycerophosphoethanolamine*     | Lipid | 0.76  | 1.00 | 0.76  |
| 786   | 2-arachidonoylglycerophosphoethanolamine*     | Lipid | 0.96  | 0.65 | 1.47  |
| 787   | 2-docosapentaenoylglycerophosphoethanolamine* | Lipid | 0.92  | 0.18 | 5.07  |
| 788   | 2-docosahexaenoylglycerophosphoethanolamine*  | Lipid | 0.94  | 0.62 | 1.51  |
| 791   | 1-myristoylglycerophosphocholine              | Lipid | 0.92  | 0.70 | 1.32  |
| 793   | 1-pentadecanoylglycerophosphocholine*         | Lipid | 1.11  | 0.70 | 1.57  |
| 794   | 1-palmitoylglycerophosphocholine              | Lipid | 0.75  | 0.46 | 1.63  |
| 795   | 2-palmitoylglycerophosphocholine*             | Lipid | 0.87  | 0.36 | 2.42  |
| 796   | 1-palmitoleoylglycerophosphocholine*          | Lipid | 0.48  | 0.55 | 0.86  |
| 797   | 2-palmitoleoylglycerophosphocholine*          | Lipid | 0.57  | 0.49 | 1.17  |
| 799   | 1-stearoylglycerophosphocholine               | Lipid | 0.32  | 0.42 | 0.76  |
| 800   | 2-stearoylglycerophosphocholine*              | Lipid | 0.81  | 0.34 | 2.41  |
| 801   | 1-oleoylglycerophosphocholine                 | Lipid | 0.37  | 0.37 | 1.01  |
| 802   | 2-oleoylglycerophosphocholine*                | Lipid | 0.88  | 0.42 | 2.11  |
| 803   | 1-linoleoylglycerophosphocholine              | Lipid | 0.61  | 0.40 | 1.51  |
| 804   | 2-linoleoylglycerophosphocholine*             | Lipid | 1.00  | 0.75 | 1.33  |
| 809   | 1-arachidonoylglycerophosphocholine*          | Lipid | 0.52  | 0.31 | 1.65  |
| 810   | 2-arachidonoylglycerophosphocholine*          | Lipid | 0.70  | 0.39 | 1.78  |
| 812   | 2-docosapentaenoylglycerophosphocholine*      | Lipid | 0.60  | 0.09 | 6.69  |
| 814   | 2-docosahexaenoylglycerophosphocholine*       | Lipid | 0.73  | 0.36 | 2.03  |
| 818   | 1-stearoylglycerophosphoinositol              | Lipid | 0.97  | 1.03 | 0.94  |
| 821   | 1-arachidonoylglycerophosphoinositol*         | Lipid | 0.57  | 0.68 | 0.83  |
| 831   | 1-palmitoylglycerol (1-monopalmitin)          | Lipid | 0.67  | 2.15 | 0.31  |
| 833   | 1-stearoylglycerol (1-monostearin)            | Lipid | 1.01  | 1.09 | 0.93  |
| 855   | sphingosine                                   | Lipid | 1.05  | 0.54 | 1.96  |
| 864   | palmitoyl sphingomyelin                       | Lipid | 1.01  | 0.97 | 1.04  |
| 865   | stearoyl sphingomyelin                        | Lipid | 1.11  | 0.89 | 1.24  |
| 879   | lathosterol                                   | Lipid | 2.12  | 0.91 | 2.33  |

|        |                                                      |                        |      |      |       |
|--------|------------------------------------------------------|------------------------|------|------|-------|
| 880    | squalene                                             | Lipid                  | 0.90 | 0.87 | 1.04  |
| 881    | cholesterol                                          | Lipid                  | 0.90 | 0.78 | 1.16  |
| 916    | beta-sitosterol                                      | Lipid                  | 0.63 | 1.03 | 0.61  |
| 918    | campesterol                                          | Lipid                  | 0.80 | 1.22 | 0.66  |
| 947    | xanthine                                             | Nucleotide             | 0.68 | 0.89 | 0.77  |
| 948    | xanthosine                                           | Nucleotide             | 0.23 | 1.21 | 0.19  |
| 950    | hypoxanthine                                         | Nucleotide             | 1.65 | 0.86 | 1.93  |
| 951    | inosine                                              | Nucleotide             | 1.01 | 1.11 | 0.92  |
| 952    | 2'-deoxyinosine                                      | Nucleotide             | 0.85 | 0.74 | 1.15  |
| 955    | adenine                                              | Nucleotide             | 2.04 | 1.14 | 1.79  |
| 956    | adenosine                                            | Nucleotide             | 0.93 | 1.13 | 0.82  |
| 958    | N1-methyladenosine                                   | Nucleotide             | 1.52 | 0.99 | 1.54  |
| 962    | adenosine 2'-monophosphate (2'-AMP)                  | Nucleotide             | 0.50 | 1.05 | 0.47  |
| 963    | adenosine 3'-monophosphate (3'-AMP)                  | Nucleotide             | 0.98 | 0.71 | 1.38  |
| 964    | adenosine 5'-monophosphate (AMP)                     | Nucleotide             | 0.69 | 1.06 | 0.65  |
| 994    | urate                                                | Nucleotide             | 0.21 | 1.33 | 0.16  |
| 995    | allantoin                                            | Nucleotide             | 0.20 | 1.03 | 0.2   |
| 997    | cytidine                                             | Nucleotide             | 1.14 | 0.97 | 1.17  |
| 999    | 5-methylcytidine                                     | Nucleotide             | 0.74 | 0.83 | 0.9   |
| 1006   | 2'-deoxycytidine                                     | Nucleotide             | 0.75 | 1.06 | 0.7   |
| 1012   | orotate                                              | Nucleotide             | 0.71 | 0.87 | 0.82  |
| 1022   | uracil                                               | Nucleotide             | 1.21 | 0.76 | 1.59  |
| 1024   | uridine                                              | Nucleotide             | 0.79 | 1.00 | 0.78  |
| 1036   | methylphosphate                                      | Nucleotide             | 0.73 | 0.80 | 0.92  |
| 1039   | gulono-1,4-lactone                                   | Cofactors and vitamins | 1.05 | 0.91 | 1.15  |
| 1040   | ascorbate (Vitamin C)                                | Cofactors and vitamins | 0.44 | 1.20 | 0.36  |
| 1049   | 5-methyltetrahydrofolate (5MeTHF)                    | Cofactors and vitamins | 0.21 | 0.63 | 0.33  |
| 1051   | biopterin                                            | Cofactors and vitamins | 1.46 | 0.94 | 1.55  |
| 1052   | dihydrobiopterin                                     | Cofactors and vitamins | 1.17 | 1.29 | 0.91  |
| 1055   | heme*                                                | Cofactors and vitamins | 2.80 | 0.24 | 11.56 |
| 1063   | nicotinamide                                         | Cofactors and vitamins | 0.82 | 1.08 | 0.76  |
| 1066   | nicotinamide adenine dinucleotide (NAD+)             | Cofactors and vitamins | 0.82 | 1.00 | 0.82  |
| 1073   | nicotinamide riboside*                               | Cofactors and vitamins | 0.26 | 1.45 | 0.18  |
| 1085   | pantothenate                                         | Cofactors and vitamins | 0.73 | 0.81 | 0.9   |
| 1086   | phosphopantetheine                                   | Cofactors and vitamins | 0.35 | 0.55 | 0.63  |
| 1087   | coenzyme A                                           | Cofactors and vitamins | 0.67 | 0.85 | 0.78  |
| 1088   | 3'-dephosphocoenzyme A                               | Cofactors and vitamins | 0.14 | 1.04 | 0.14  |
| 1097   | pyridoxal                                            | Cofactors and vitamins | 0.55 | 0.74 | 0.74  |
| 1098   | flavin adenine dinucleotide (FAD)                    | Cofactors and vitamins | 0.65 | 1.00 | 0.65  |
| 1099   | riboflavin (Vitamin B2)                              | Cofactors and vitamins | 0.65 | 0.90 | 0.72  |
| 1100   | flavin mononucleotide (FMN)                          | Cofactors and vitamins | 0.50 | 0.95 | 0.53  |
| 1105   | alpha-tocopherol                                     | Cofactors and vitamins | 0.65 | 1.31 | 0.5   |
| 1108   | gamma-tocopherol                                     | Cofactors and vitamins | 1.11 | 0.78 | 1.42  |
| 1117   | pyridoxate                                           | Cofactors and vitamins | 0.34 | 0.53 | 0.65  |
| 1157   | glycerol 2-phosphate                                 | Xenobiotics            | 0.54 | 1.89 | 0.29  |
| 1191.5 | Isobar: 2-propylpentanoic acid, 2-ethylhexanoic acid | Xenobiotics            | 0.98 | 0.94 | 1.04  |
| 1330   | ergothioneine                                        | Xenobiotics            | 0.70 | 0.77 | 0.92  |
| 1360   | erythritol                                           | Xenobiotics            | 0.62 | 0.77 | 0.8   |
| 1366   | galacturonate                                        | Xenobiotics            | 1.24 | 1.52 | 0.82  |
|        | X - 01497                                            | N/A                    | 0.23 | 0.74 | 0.3   |
|        | X - 02029                                            | N/A                    | 0.05 | 0.49 | 0.1   |
|        | X - 03094                                            | N/A                    | 0.78 | 0.91 | 0.86  |
|        | X - 03249                                            | N/A                    | 0.11 | 0.35 | 0.3   |
|        | X - 03998                                            | N/A                    | 1.16 | 1.09 | 1.06  |
|        | X - 04015                                            | N/A                    | 0.44 | 1.01 | 0.44  |

|  |           |     |       |      |       |
|--|-----------|-----|-------|------|-------|
|  | X - 04040 | N/A | 1.01  | 1.32 | 0.76  |
|  | X - 04051 | N/A | 0.32  | 0.76 | 0.42  |
|  | X - 04077 | N/A | 0.71  | 0.80 | 0.88  |
|  | X - 04357 | N/A | 1.93  | 0.67 | 2.89  |
|  | X - 04498 | N/A | 1.30  | 0.90 | 1.44  |
|  | X - 04523 | N/A | 0.83  | 1.04 | 0.8   |
|  | X - 04629 | N/A | 0.21  | 0.30 | 0.7   |
|  | X - 04987 | N/A | 1.14  | 0.91 | 1.25  |
|  | X - 05228 | N/A | 1.25  | 1.33 | 0.94  |
|  | X - 05229 | N/A | 1.24  | 1.38 | 0.89  |
|  | X - 06227 | N/A | 0.60  | 0.68 | 0.89  |
|  | X - 06350 | N/A | 0.97  | 0.80 | 1.2   |
|  | X - 06649 | N/A | 1.09  | 0.69 | 1.58  |
|  | X - 06650 | N/A | 0.21  | 3.86 | 0.06  |
|  | X - 06666 | N/A | 0.80  | 0.71 | 1.12  |
|  | X - 06667 | N/A | 0.58  | 0.83 | 0.7   |
|  | X - 07890 | N/A | 0.91  | 1.48 | 0.61  |
|  | X - 08166 | N/A | 0.95  | 0.88 | 1.08  |
|  | X - 08167 | N/A | 0.79  | 0.88 | 0.89  |
|  | X - 08169 | N/A | 0.11  | 0.51 | 0.22  |
|  | X - 08743 | N/A | 35.87 | 0.98 | 36.49 |
|  | X - 08754 | N/A | 2.65  | 1.00 | 2.65  |
|  | X - 08766 | N/A | 0.96  | 1.05 | 0.92  |
|  | X - 08791 | N/A | 1.09  | 1.75 | 0.62  |
|  | X - 08994 | N/A | 1.73  | 1.63 | 1.06  |
|  | X - 09069 | N/A | 0.80  | 1.30 | 0.62  |
|  | X - 09418 | N/A | 0.83  | 1.30 | 0.64  |
|  | X - 10266 | N/A | 0.42  | 1.58 | 0.27  |
|  | X - 10358 | N/A | 0.50  | 0.83 | 0.61  |
|  | X - 10426 | N/A | 1.07  | 0.89 | 1.2   |
|  | X - 10445 | N/A | 0.96  | 1.26 | 0.76  |
|  | X - 10457 | N/A | 0.80  | 0.69 | 1.15  |
|  | X - 10500 | N/A | 0.77  | 0.77 | 1     |
|  | X - 10593 | N/A | 2.29  | 0.98 | 2.34  |
|  | X - 10607 | N/A | 0.90  | 1.97 | 0.46  |
|  | X - 10611 | N/A | 0.75  | 0.66 | 1.15  |
|  | X - 10677 | N/A | 0.15  | 0.55 | 0.28  |
|  | X - 10753 | N/A | 1.31  | 0.90 | 1.46  |
|  | X - 10875 | N/A | 0.72  | 0.63 | 1.13  |
|  | X - 10876 | N/A | 0.64  | 0.84 | 0.76  |
|  | X - 11185 | N/A | 0.86  | 0.98 | 0.88  |
|  | X - 11204 | N/A | 1.26  | 1.02 | 1.24  |
|  | X - 11315 | N/A | 0.97  | 0.77 | 1.26  |
|  | X - 11327 | N/A | 1.27  | 1.32 | 0.96  |
|  | X - 11334 | N/A | 0.69  | 0.81 | 0.86  |
|  | X - 11412 | N/A | 0.96  | 0.72 | 1.32  |
|  | X - 11533 | N/A | 1.04  | 0.94 | 1.11  |
|  | X - 11538 | N/A | 0.55  | 0.81 | 0.68  |
|  | X - 11542 | N/A | 0.86  | 0.70 | 1.23  |
|  | X - 11570 | N/A | 0.24  | 0.55 | 0.43  |
|  | X - 11575 | N/A | 0.48  | 1.30 | 0.37  |
|  | X - 11576 | N/A | 0.92  | 0.97 | 0.94  |
|  | X - 11578 | N/A | 0.37  | 1.04 | 0.36  |
|  | X - 11580 | N/A | 0.86  | 0.96 | 0.9   |
|  | X - 11581 | N/A | 0.33  | 0.87 | 0.38  |

|  |           |     |      |      |      |
|--|-----------|-----|------|------|------|
|  | X - 11583 | N/A | 0.09 | 0.56 | 0.16 |
|  | X - 11584 | N/A | 0.86 | 1.72 | 0.5  |
|  | X - 11585 | N/A | 0.70 | 1.31 | 0.53 |
|  | X - 11586 | N/A | 0.08 | 0.35 | 0.22 |
|  | X - 11591 | N/A | 1.10 | 1.18 | 0.93 |
|  | X - 11592 | N/A | 0.83 | 0.84 | 0.99 |
|  | X - 11593 | N/A | 0.24 | 0.47 | 0.51 |
|  | X - 11598 | N/A | 0.77 | 0.90 | 0.85 |
|  | X - 11607 | N/A | 0.78 | 1.02 | 0.76 |
|  | X - 11611 | N/A | 1.06 | 0.86 | 1.23 |
|  | X - 11612 | N/A | 0.81 | 0.97 | 0.84 |
|  | X - 11613 | N/A | 0.44 | 0.67 | 0.66 |
|  | X - 11614 | N/A | 1.10 | 0.84 | 1.31 |
|  | X - 11616 | N/A | 0.19 | 0.59 | 0.31 |
|  | X - 11617 | N/A | 0.34 | 1.79 | 0.19 |
|  | X - 11621 | N/A | 0.70 | 0.94 | 0.75 |
|  | X - 11623 | N/A | 3.22 | 0.73 | 4.39 |
|  | X - 11625 | N/A | 1.00 | 0.94 | 1.06 |
|  | X - 11629 | N/A | 0.95 | 0.54 | 1.75 |
|  | X - 11630 | N/A | 0.96 | 0.41 | 2.35 |
|  | X - 11631 | N/A | 0.64 | 0.49 | 1.32 |
|  | X - 11639 | N/A | 0.99 | 0.59 | 1.67 |
|  | X - 11641 | N/A | 0.41 | 1.22 | 0.34 |
|  | X - 11647 | N/A | 0.06 | 0.46 | 0.12 |
|  | X - 11648 | N/A | 0.65 | 0.96 | 0.68 |
|  | X - 11677 | N/A | 0.18 | 0.46 | 0.38 |
|  | X - 11684 | N/A | 0.46 | 0.98 | 0.47 |
|  | X - 11687 | N/A | 0.78 | 1.23 | 0.63 |
|  | X - 11709 | N/A | 0.72 | 0.94 | 0.76 |
|  | X - 11715 | N/A | 0.96 | 0.98 | 0.98 |
|  | X - 11718 | N/A | 0.72 | 1.19 | 0.6  |
|  | X - 11720 | N/A | 0.58 | 1.13 | 0.52 |
|  | X - 11722 | N/A | 0.44 | 1.10 | 0.4  |
|  | X - 11724 | N/A | 0.52 | 0.82 | 0.64 |
|  | X - 11725 | N/A | 0.45 | 0.65 | 0.7  |
|  | X - 11875 | N/A | 0.83 | 1.09 | 0.76 |
|  | X - 11914 | N/A | 1.23 | 1.60 | 0.77 |
|  | X - 12051 | N/A | 0.80 | 0.56 | 1.42 |
|  | X - 12104 | N/A | 0.81 | 0.94 | 0.86 |
|  | X - 12206 | N/A | 0.46 | 1.28 | 0.36 |
|  | X - 12421 | N/A | 0.28 | 0.14 | 1.96 |
|  | X - 12422 | N/A | 0.41 | 0.16 | 2.52 |
|  | X - 12435 | N/A | 0.75 | 0.81 | 0.92 |
|  | X - 12465 | N/A | 6.44 | 0.53 | 12.1 |
|  | X - 12478 | N/A | 1.67 | 0.43 | 3.86 |
|  | X - 12627 | N/A | 1.76 | 0.59 | 3    |
|  | X - 12645 | N/A | 0.82 | 0.83 | 0.99 |
|  | X - 12660 | N/A | 0.64 | 0.50 | 1.27 |
|  | X - 12663 | N/A | 0.91 | 1.44 | 0.63 |
|  | X - 12689 | N/A | 0.88 | 2.24 | 0.39 |
|  | X - 12854 | N/A | 1.14 | 0.94 | 1.2  |
|  | X - 12855 | N/A | 0.81 | 0.72 | 1.12 |
|  | X - 12953 | N/A | 0.18 | 1.12 | 0.16 |
|  | X - 12985 | N/A | 1.41 | 0.56 | 2.53 |
|  | X - 12986 | N/A | 0.99 | 0.59 | 1.69 |

|  |           |     |         |       |       |
|--|-----------|-----|---------|-------|-------|
|  | X - 12992 | N/A | 0.31    | 1.01  | 0.31  |
|  | X - 13007 | N/A | 2.76    | 1.31  | 2.1   |
|  | X - 13019 | N/A | 1.78    | 1.58  | 1.13  |
|  | X - 13215 | N/A | 0.98    | 0.79  | 1.23  |
|  | X - 13230 | N/A | 0.94    | 1.23  | 0.76  |
|  | X - 13496 | N/A | 0.87    | 0.89  | 0.98  |
|  | X - 13497 | N/A | 1.15    | 2.08  | 0.55  |
|  | X - 13502 | N/A | 12.88   | 1.40  | 9.23  |
|  | X - 13505 | N/A | 155.97  | 1.34  | 116.6 |
|  | X - 13557 | N/A | 1.65    | 0.72  | 2.3   |
|  | X - 13560 | N/A | 0.84    | 1.09  | 0.77  |
|  | X - 13671 | N/A | 0.83    | 1.11  | 0.75  |
|  | X - 13872 | N/A | 0.90    | 1.33  | 0.67  |
|  | X - 14088 | N/A | 0.59    | 1.02  | 0.58  |
|  | X - 14089 | N/A | 0.61    | 0.98  | 0.62  |
|  | X - 14092 | N/A | 0.79    | 0.90  | 0.88  |
|  | X - 14130 | N/A | 0.80    | 1.64  | 0.49  |
|  | X - 14567 | N/A | 0.97    | 0.80  | 1.22  |
|  | X - 14619 | N/A | 1.48    | 1.36  | 1.09  |
|  | X - 14624 | N/A | 1622.79 | 16.43 | 98.79 |
|  | X - 14626 | N/A | 0.96    | 1.10  | 0.87  |
|  | X - 14837 | N/A | 1.91    | 1.68  | 1.14  |
|  | X - 15136 | N/A | 0.86    | 1.11  | 0.77  |
|  | X - 15222 | N/A | 1.04    | 0.90  | 1.16  |
|  | X - 15301 | N/A | 0.76    | 1.29  | 0.59  |
|  | X - 15312 | N/A | 0.69    | 1.34  | 0.51  |
|  | X - 15382 | N/A | 0.31    | 1.02  | 0.31  |
|  | X - 15401 | N/A | 0.18    | 0.39  | 0.47  |
|  | X - 15415 | N/A | 0.71    | 1.21  | 0.58  |
|  | X - 15484 | N/A | 0.30    | 0.90  | 0.33  |
|  | X - 15507 | N/A | 1.38    | 1.95  | 0.71  |
|  | X - 15520 | N/A | 1.67    | 1.27  | 1.32  |
|  | X - 15545 | N/A | 1.05    | 0.95  | 1.1   |
|  | X - 15546 | N/A | 1.36    | 1.25  | 1.08  |
|  | X - 15552 | N/A | 0.18    | 0.81  | 0.23  |
|  | X - 15555 | N/A | 1.74    | 0.56  | 3.14  |
|  | X - 15558 | N/A | 1.05    | 1.12  | 0.94  |
|  | X - 15559 | N/A | 1.00    | 1.12  | 0.89  |
|  | X - 15562 | N/A | 1.00    | 1.12  | 0.89  |
|  | X - 15563 | N/A | 1.01    | 1.12  | 0.9   |
|  | X - 15594 | N/A | 1.52    | 1.22  | 1.25  |
|  | X - 15624 | N/A | 0.98    | 1.09  | 0.9   |
|  | X - 15649 | N/A | 1.12    | 0.97  | 1.16  |
|  | X - 15937 | N/A | 1.39    | 0.75  | 1.85  |
|  | X - 16103 | N/A | 1.27    | 1.05  | 1.2   |
|  | X - 16186 | N/A | 0.34    | 0.79  | 0.44  |
|  | X - 16243 | N/A | 0.80    | 0.89  | 0.9   |
|  | X - 16255 | N/A | 1.17    | 1.06  | 1.11  |
|  | X - 16397 | N/A | 0.58    | 0.92  | 0.63  |
|  | X - 16578 | N/A | 0.93    | 0.69  | 1.34  |
|  | X - 16580 | N/A | 0.65    | 1.02  | 0.64  |
|  | X - 16803 | N/A | 7.45    | 0.57  | 12.98 |
|  | X - 16804 | N/A | 1.34    | 1.00  | 1.34  |
|  | X - 16812 | N/A | 1.40    | 1.00  | 1.4   |
|  | X - 16819 | N/A | 1.56    | 0.29  | 5.39  |



|  |           |     |      |      |      |
|--|-----------|-----|------|------|------|
|  | X - 16826 | N/A | 4.18 | 0.45 | 9.25 |
|  | X - 16831 | N/A | 1.13 | 1.04 | 1.09 |
|  | X - 16853 | N/A | 0.61 | 1.29 | 0.48 |
|  | X - 16869 | N/A | 0.31 | 1.03 | 0.3  |
|  | X - 16970 | N/A | 0.57 | 0.61 | 0.93 |
|  | X - 17008 | N/A | 0.41 | 0.83 | 0.5  |
|  | X - 17009 | N/A | 0.51 | 0.79 | 0.65 |
|  | X - 17010 | N/A | 1.42 | 0.74 | 1.93 |
|  | X - 17011 | N/A | 0.65 | 0.53 | 1.23 |
|  | X - 17024 | N/A | 1.57 | 0.26 | 6.04 |
|  | X - 17263 | N/A | 0.14 | 0.62 | 0.23 |
