# Supplementary material
Source: publisher figshare collection journal article supplement (https://karger.figshare.com/articles/dataset/_/5123644)
Supplement: Supplementary file 6 [file 1]

| <b>Table S11. Heat map of statistically significant biochemicals profiled in inguinal adipose tissue.</b> Shaded cells indicate $p \leq 0.05$ ( <b>red</b> indicates that the mean values are significantly higher for that comparison; <b>green</b> values significantly lower). <b>Blue-bolded</b> text indicates $0.05 < p < 0.10$ . |                                    |               | Fold of Change             |                       |                       |
|-----------------------------------------------------------------------------------------------------------------------------------------------------------------------------------------------------------------------------------------------------------------------------------------------------------------------------------------|------------------------------------|---------------|----------------------------|-----------------------|-----------------------|
|                                                                                                                                                                                                                                                                                                                                         |                                    |               | Welch's Two Sample t-Tests |                       |                       |
| PATHWAY SORT                                                                                                                                                                                                                                                                                                                            | BIOCHEMICAL NAME                   | SUPER PATHWAY | <u>MR</u><br>CF            | <u>MR + CYS</u><br>CF | <u>MR</u><br>MR + CYS |
| 1                                                                                                                                                                                                                                                                                                                                       | glycine                            | Amino acid    | 1.01                       | 0.87                  | 1.15                  |
| 7                                                                                                                                                                                                                                                                                                                                       | serine                             | Amino acid    | 2.59                       | 1.28                  | 2.02                  |
| 16                                                                                                                                                                                                                                                                                                                                      | threonine                          | Amino acid    | 2.11                       | 0.93                  | 2.27                  |
| 21                                                                                                                                                                                                                                                                                                                                      | betaine                            | Amino acid    | 0.67                       | 0.99                  | 0.68                  |
| 22                                                                                                                                                                                                                                                                                                                                      | betaine aldehyde                   | Amino acid    | 1.50                       | 1.60                  | 0.94                  |
| 23                                                                                                                                                                                                                                                                                                                                      | alanine                            | Amino acid    | 1.61                       | 1.37                  | 1.17                  |
| 24                                                                                                                                                                                                                                                                                                                                      | beta-alanine                       | Amino acid    | 1.10                       | 0.92                  | 1.2                   |
| 29                                                                                                                                                                                                                                                                                                                                      | aspartate                          | Amino acid    | 1.39                       | 1.16                  | 1.2                   |
| 33                                                                                                                                                                                                                                                                                                                                      | asparagine                         | Amino acid    | 1.34                       | 1.27                  | 1.06                  |
| 38                                                                                                                                                                                                                                                                                                                                      | glutamate                          | Amino acid    | 0.95                       | 1.09                  | 0.88                  |
| 42                                                                                                                                                                                                                                                                                                                                      | glutamine                          | Amino acid    | 1.30                       | 1.26                  | 1.03                  |
| 46                                                                                                                                                                                                                                                                                                                                      | N-acetyl-aspartyl-glutamate (NAAG) | Amino acid    | 0.98                       | 0.75                  | 1.3                   |
| 48                                                                                                                                                                                                                                                                                                                                      | histidine                          | Amino acid    | 2.08                       | 1.37                  | 1.52                  |
| 50                                                                                                                                                                                                                                                                                                                                      | urocanate                          | Amino acid    | 1.16                       | 0.87                  | 1.33                  |
| 53                                                                                                                                                                                                                                                                                                                                      | histamine                          | Amino acid    | 1.36                       | 1.59                  | 0.85                  |
| 66                                                                                                                                                                                                                                                                                                                                      | lysine                             | Amino acid    | 1.55                       | 1.17                  | 1.33                  |
| 78                                                                                                                                                                                                                                                                                                                                      | phenylalanine                      | Amino acid    | 1.65                       | 1.27                  | 1.3                   |
| 90                                                                                                                                                                                                                                                                                                                                      | tyrosine                           | Amino acid    | 1.56                       | 1.43                  | 1.1                   |
| 91                                                                                                                                                                                                                                                                                                                                      | 3-(4-hydroxyphenyl)lactate         | Amino acid    | 0.57                       | 0.89                  | 0.65                  |
| 114                                                                                                                                                                                                                                                                                                                                     | phenylacetylglutamine              | Amino acid    | 0.62                       | 0.91                  | 0.68                  |
| 121                                                                                                                                                                                                                                                                                                                                     | phenol sulfate                     | Amino acid    | 0.41                       | 0.71                  | 0.58                  |
| 124                                                                                                                                                                                                                                                                                                                                     | kynurenate                         | Amino acid    | 1.13                       | 1.31                  | 0.86                  |
| 125                                                                                                                                                                                                                                                                                                                                     | kynurenine                         | Amino acid    | 0.85                       | 1.33                  | 0.64                  |
| 126                                                                                                                                                                                                                                                                                                                                     | tryptophan                         | Amino acid    | 1.46                       | 1.32                  | 1.1                   |
| 141                                                                                                                                                                                                                                                                                                                                     | C-glycosyltryptophan*              | Amino acid    | 0.56                       | 0.81                  | 0.69                  |
| 150                                                                                                                                                                                                                                                                                                                                     | 3-methyl-2-oxovalerate             | Amino acid    | 0.99                       | 0.93                  | 1.07                  |
| 157                                                                                                                                                                                                                                                                                                                                     | isoleucine                         | Amino acid    | 1.49                       | 1.12                  | 1.32                  |
| 158                                                                                                                                                                                                                                                                                                                                     | leucine                            | Amino acid    | 1.71                       | 1.22                  | 1.41                  |
| 167                                                                                                                                                                                                                                                                                                                                     | valine                             | Amino acid    | 1.48                       | 1.13                  | 1.31                  |
| 170                                                                                                                                                                                                                                                                                                                                     | 4-methyl-2-oxopentanoate           | Amino acid    | 1.25                       | 1.09                  | 1.14                  |
| 177                                                                                                                                                                                                                                                                                                                                     | isobutyrylcarnitine                | Amino acid    | 0.96                       | 1.12                  | 0.86                  |
| 179                                                                                                                                                                                                                                                                                                                                     | 2-methylbutyrylcarnitine           | Amino acid    | 0.68                       | 1.31                  | 0.52                  |
| 181                                                                                                                                                                                                                                                                                                                                     | isovalerylcarnitine                | Amino acid    | 1.43                       | 2.10                  | 0.68                  |
| 188                                                                                                                                                                                                                                                                                                                                     | cysteine                           | Amino acid    | 1.33                       | 1.25                  | 1.06                  |
| 191                                                                                                                                                                                                                                                                                                                                     | cystine                            | Amino acid    | 1.95                       | 0.62                  | 3.15                  |
| 193                                                                                                                                                                                                                                                                                                                                     | methionine sulfoxide               | Amino acid    | 1.62                       | 0.79                  | 2.05                  |
| 195                                                                                                                                                                                                                                                                                                                                     | hypotaurine                        | Amino acid    | 0.50                       | 3.75                  | 0.13                  |
| 196                                                                                                                                                                                                                                                                                                                                     | taurine                            | Amino acid    | 0.81                       | 0.94                  | 0.86                  |
| 198                                                                                                                                                                                                                                                                                                                                     | S-adenosylhomocysteine (SAH)       | Amino acid    | 2.13                       | 1.47                  | 1.45                  |
| 199                                                                                                                                                                                                                                                                                                                                     | methionine                         | Amino acid    | 1.40                       | 1.13                  | 1.24                  |
| 201                                                                                                                                                                                                                                                                                                                                     | N-acetylmethionine                 | Amino acid    | 0.84                       | 1.75                  | 0.48                  |
| 212                                                                                                                                                                                                                                                                                                                                     | dimethylarginine (SDMA + ADMA)     | Amino acid    | 1.01                       | 0.96                  | 1.05                  |
| 213                                                                                                                                                                                                                                                                                                                                     | arginine                           | Amino acid    | 1.29                       | 1.10                  | 1.17                  |
| 216                                                                                                                                                                                                                                                                                                                                     | ornithine                          | Amino acid    | 2.30                       | 1.72                  | 1.33                  |
| 217                                                                                                                                                                                                                                                                                                                                     | urea                               | Amino acid    | 1.43                       | 0.81                  | 1.76                  |
| 218                                                                                                                                                                                                                                                                                                                                     | proline                            | Amino acid    | 1.24                       | 1.04                  | 1.19                  |
| 220                                                                                                                                                                                                                                                                                                                                     | citrulline                         | Amino acid    | 1.07                       | 1.03                  | 1.04                  |

|       |                                            |              |      |      |      |
|-------|--------------------------------------------|--------------|------|------|------|
| 224   | trans-4-hydroxyproline                     | Amino acid   | 0.62 | 1.00 | 0.62 |
| 232   | creatine                                   | Amino acid   | 0.88 | 0.79 | 1.11 |
| 233   | creatinine                                 | Amino acid   | 0.62 | 0.76 | 0.81 |
| 235   | 2-aminobutyrate                            | Amino acid   | 1.54 | 0.72 | 2.12 |
| 238   | 5-methylthioadenosine (MTA)                | Amino acid   | 1.72 | 1.81 | 0.95 |
| 242   | spermidine                                 | Amino acid   | 1.20 | 1.54 | 0.78 |
| 246   | 4-guanidinobutanoate                       | Amino acid   | 1.20 | 1.00 | 1.2  |
| 251   | glutathione, reduced (GSH)                 | Amino acid   | 6.14 | 7.05 | 0.87 |
| 253   | 5-oxoproline                               | Amino acid   | 2.35 | 1.29 | 1.81 |
| 254   | glutathione, oxidized (GSSG)               | Amino acid   | 1.06 | 1.48 | 0.72 |
| 255   | cysteine-glutathione disulfide             | Amino acid   | 1.02 | 1.15 | 0.89 |
| 256   | ophthalmate                                | Amino acid   | 5.34 | 0.94 | 5.66 |
| 261   | glycylvaline                               | Peptide      | 1.81 | 2.13 | 0.85 |
| 266   | glycylleucine                              | Peptide      | 2.29 | 2.69 | 0.85 |
| 298   | pro-hydroxy-pro                            | Peptide      | 0.63 | 0.77 | 0.82 |
| 316   | carnosine                                  | Peptide      | 1.00 | 1.00 | 1    |
| 318   | anserine                                   | Peptide      | 0.25 | 0.73 | 0.34 |
| 323   | gamma-glutamylleucine                      | Peptide      | 2.10 | 1.10 | 1.9  |
| 328   | gamma-glutamylglutamate                    | Peptide      | 1.33 | 1.69 | 0.79 |
| 329   | gamma-glutamylglutamine                    | Peptide      | 1.29 | 1.27 | 1.02 |
| 370   | N-acetylglucosamine 6-phosphate            | Carbohydrate | 0.89 | 0.99 | 0.9  |
| 374   | N-acetylneuraminate                        | Carbohydrate | 1.34 | 1.43 | 0.94 |
| 404   | mannose-6-phosphate                        | Carbohydrate | 1.16 | 1.20 | 0.97 |
| 430   | 1,5-anhydroglucitol (1,5-AG)               | Carbohydrate | 1.62 | 0.66 | 2.44 |
| 432   | glycerate                                  | Carbohydrate | 1.69 | 1.50 | 1.13 |
| 434   | glucose-6-phosphate (G6P)                  | Carbohydrate | 1.02 | 1.06 | 0.97 |
| 436   | glucose                                    | Carbohydrate | 0.72 | 0.66 | 1.1  |
| 439   | fructose-6-phosphate                       | Carbohydrate | 1.16 | 1.14 | 1.02 |
| 444   | 3-phosphoglycerate                         | Carbohydrate | 1.35 | 1.24 | 1.08 |
| 447   | 1,3-dihydroxyacetone                       | Carbohydrate | 2.17 | 1.75 | 1.24 |
| 449   | phosphoenolpyruvate (PEP)                  | Carbohydrate | 2.80 | 2.02 | 1.38 |
| 451   | lactate                                    | Carbohydrate | 0.88 | 0.96 | 0.91 |
| 459   | 6-phosphogluconate                         | Carbohydrate | 1.42 | 1.29 | 1.1  |
| 491   | citrate                                    | Energy       | 0.58 | 0.46 | 1.27 |
| 501   | succinate                                  | Energy       | 0.72 | 1.41 | 0.52 |
| 504   | fumarate                                   | Energy       | 1.29 | 1.24 | 1.04 |
| 507   | malate                                     | Energy       | 1.13 | 0.94 | 1.2  |
| 511   | phosphate                                  | Energy       | 1.49 | 1.40 | 1.06 |
| 512   | pyrophosphate (PPi)                        | Energy       | 0.81 | 1.28 | 0.63 |
| 512.5 | linoleate (18:2n6)                         | Lipid        | 1.57 | 1.05 | 1.51 |
| 516   | linolenate [alpha or gamma; (18:3n3 or 6)] | Lipid        | 1.47 | 1.05 | 1.4  |
| 517   | dihomo-linolenate (20:3n3 or n6)           | Lipid        | 1.99 | 1.05 | 1.89 |
| 519   | docosapentaenoate (n3 DPA; 22:5n3)         | Lipid        | 2.62 | 1.33 | 1.98 |
| 520   | docosapentaenoate (n6 DPA; 22:5n6)         | Lipid        | 3.60 | 0.52 | 6.88 |
| 521   | docosahexaenoate (DHA; 22:6n3)             | Lipid        | 2.94 | 0.77 | 3.8  |
| 525   | caproate (6:0)                             | Lipid        | 0.75 | 1.38 | 0.54 |
| 527   | caprylate (8:0)                            | Lipid        | 1.02 | 2.13 | 0.48 |
| 528   | pelargonate (9:0)                          | Lipid        | 1.00 | 1.09 | 0.92 |
| 529   | caprate (10:0)                             | Lipid        | 1.04 | 2.28 | 0.46 |
| 532   | laurate (12:0)                             | Lipid        | 0.81 | 1.06 | 0.77 |
| 535   | myristate (14:0)                           | Lipid        | 1.08 | 0.92 | 1.18 |
| 536   | myristoleate (14:1n5)                      | Lipid        | 1.12 | 1.10 | 1.02 |
| 537   | pentadecanoate (15:0)                      | Lipid        | 0.83 | 0.92 | 0.91 |
| 538   | palmitate (16:0)                           | Lipid        | 1.38 | 0.90 | 1.53 |
| 539   | palmitoleate (16:1n7)                      | Lipid        | 2.37 | 0.91 | 2.59 |

|       |                                           |            |      |      |      |
|-------|-------------------------------------------|------------|------|------|------|
| 542   | 10-heptadecenoate (17:1n7)                | Lipid      | 1.06 | 0.85 | 1.25 |
| 545   | oleate (18:1n9)                           | Lipid      | 2.60 | 0.99 | 2.64 |
| 547   | cis-vaccenate (18:1n7)                    | Lipid      | 0.63 | 0.67 | 0.94 |
| 554   | 10-nonadecenoate (19:1n9)                 | Lipid      | 1.89 | 0.77 | 2.46 |
| 559   | eicosenoate (20:1n9 or 11)                | Lipid      | 2.31 | 0.95 | 2.43 |
| 561   | dihomo-linoleate (20:2n6)                 | Lipid      | 1.99 | 0.89 | 2.23 |
| 565   | arachidonate (20:4n6)                     | Lipid      | 1.40 | 0.85 | 1.65 |
| 569   | docosadienoate (22:2n6)                   | Lipid      | 2.18 | 1.26 | 1.73 |
| 571   | adrenate (22:4n6)                         | Lipid      | 2.41 | 0.99 | 2.43 |
| 597   | 3-hydroxydecanoate                        | Lipid      | 3.34 | 3.21 | 1.04 |
| 608   | 13-HODE + 9-HODE                          | Lipid      | 1.85 | 1.64 | 1.13 |
| 616   | azelate (nonanedioate)                    | Lipid      | 1.26 | 0.85 | 1.49 |
| 618   | tetradecanedioate                         | Lipid      | 0.95 | 0.87 | 1.09 |
| 619   | hexadecanedioate                          | Lipid      | 0.99 | 0.98 | 1.01 |
| 632.7 | 17-methylstearate                         | Lipid      | 2.01 | 1.04 | 1.92 |
| 667.4 | 6-keto prostaglandin F1alpha              | Lipid      | 0.36 | 0.34 | 1.05 |
| 683   | propionylcarnitine                        | Lipid      | 0.48 | 0.79 | 0.6  |
| 685   | butyrylcarnitine                          | Lipid      | 0.37 | 1.00 | 0.37 |
| 691   | deoxycarnitine                            | Lipid      | 1.35 | 1.54 | 0.88 |
| 692   | carnitine                                 | Lipid      | 0.98 | 1.06 | 0.93 |
| 694   | acetylcarnitine                           | Lipid      | 0.60 | 0.83 | 0.72 |
| 709   | cholate                                   | Lipid      | 0.66 | 0.82 | 0.8  |
| 745   | choline phosphate                         | Lipid      | 0.96 | 1.18 | 0.82 |
| 746   | ethanolamine                              | Lipid      | 2.18 | 1.41 | 1.55 |
| 747   | phosphoethanolamine                       | Lipid      | 0.96 | 0.99 | 0.97 |
| 750   | glycerol                                  | Lipid      | 1.48 | 1.09 | 1.36 |
| 752   | glycerol 3-phosphate (G3P)                | Lipid      | 1.82 | 2.12 | 0.86 |
| 753   | glycerophosphorylcholine (GPC)            | Lipid      | 1.79 | 1.78 | 1.01 |
| 760   | myo-inositol                              | Lipid      | 5.73 | 6.25 | 0.92 |
| 763   | inositol 1-phosphate (I1P)                | Lipid      | 2.00 | 2.00 | 1    |
| 763.5 | myo-inositol 1,4-bisphosphate             | Lipid      | 1.15 | 1.06 | 1.08 |
| 767   | scyllo-inositol                           | Lipid      | 7.84 | 5.23 | 1.5  |
| 775   | 1-palmitoylglycerophosphoethanolamine     | Lipid      | 2.42 | 1.16 | 2.08 |
| 780   | 1-stearoylglycerophosphoethanolamine      | Lipid      | 2.00 | 1.09 | 1.82 |
| 781   | 1-oleoylglycerophosphoethanolamine        | Lipid      | 1.80 | 1.28 | 1.41 |
| 782   | 2-oleoylglycerophosphoethanolamine*       | Lipid      | 1.53 | 1.39 | 1.1  |
| 785   | 1-arachidonoylglycerophosphoethanolamine* | Lipid      | 1.26 | 1.12 | 1.12 |
| 786   | 2-arachidonoylglycerophosphoethanolamine* | Lipid      | 1.57 | 1.28 | 1.22 |
| 794   | 1-palmitoylglycerophosphocholine          | Lipid      | 0.59 | 0.89 | 0.66 |
| 799   | 1-stearoylglycerophosphocholine           | Lipid      | 0.75 | 0.62 | 1.21 |
| 801   | 1-oleoylglycerophosphocholine             | Lipid      | 0.61 | 0.92 | 0.67 |
| 816   | 1-palmitoylglycerophosphoinositol*        | Lipid      | 4.77 | 1.85 | 2.58 |
| 818   | 1-stearoylglycerophosphoinositol          | Lipid      | 3.03 | 1.44 | 2.1  |
| 821   | 1-arachidonoylglycerophosphoinositol*     | Lipid      | 3.65 | 1.77 | 2.06 |
| 825.5 | 1-palmitoylplasmenylethanolamine*         | Lipid      | 1.55 | 1.06 | 1.45 |
| 864   | palmitoyl sphingomyelin                   | Lipid      | 1.58 | 1.38 | 1.15 |
| 865   | stearoyl sphingomyelin                    | Lipid      | 1.93 | 1.16 | 1.66 |
| 881   | cholesterol                               | Lipid      | 1.25 | 0.92 | 1.36 |
| 916   | beta-sitosterol                           | Lipid      | 1.24 | 1.75 | 0.71 |
| 918   | campesterol                               | Lipid      | 1.49 | 1.54 | 0.97 |
| 947   | xanthine                                  | Nucleotide | 3.60 | 2.20 | 1.64 |
| 948   | xanthosine                                | Nucleotide | 1.22 | 1.74 | 0.7  |
| 950   | hypoxanthine                              | Nucleotide | 1.89 | 1.04 | 1.81 |
| 951   | inosine                                   | Nucleotide | 3.37 | 3.22 | 1.04 |
| 958   | N1-methyladenosine                        | Nucleotide | 0.95 | 0.92 | 1.03 |

|      |                                     |                        |      |      |      |
|------|-------------------------------------|------------------------|------|------|------|
| 962  | adenosine 2'-monophosphate (2'-AMP) | Nucleotide             | 2.12 | 1.41 | 1.5  |
| 963  | adenosine 3'-monophosphate (3'-AMP) | Nucleotide             | 1.85 | 1.08 | 1.72 |
| 994  | urate                               | Nucleotide             | 1.70 | 1.71 | 1    |
| 995  | allantoin                           | Nucleotide             | 1.06 | 0.81 | 1.31 |
| 997  | cytidine                            | Nucleotide             | 1.45 | 1.26 | 1.15 |
| 999  | 5-methylcytidine                    | Nucleotide             | 0.80 | 0.77 | 1.03 |
| 1001 | cytidine 5'-monophosphate (5'-CMP)  | Nucleotide             | 1.65 | 1.80 | 0.91 |
| 1006 | 2'-deoxycytidine                    | Nucleotide             | 0.61 | 0.74 | 0.82 |
| 1022 | uracil                              | Nucleotide             | 1.36 | 1.27 | 1.06 |
| 1024 | uridine                             | Nucleotide             | 1.28 | 2.24 | 0.57 |
| 1025 | pseudouridine                       | Nucleotide             | 1.01 | 0.76 | 1.32 |
| 1040 | ascorbate (Vitamin C)               | Cofactors and vitamins | 1.00 | 1.00 | 1    |
| 1063 | nicotinamide                        | Cofactors and vitamins | 1.90 | 1.70 | 1.12 |
| 1073 | nicotinamide riboside*              | Cofactors and vitamins | 6.17 | 8.86 | 0.7  |
| 1085 | pantothenate                        | Cofactors and vitamins | 1.80 | 1.33 | 1.36 |
| 1086 | phosphopantetheine                  | Cofactors and vitamins | 2.70 | 2.63 | 1.03 |
| 1097 | pyridoxal                           | Cofactors and vitamins | 1.46 | 1.22 | 1.2  |
| 1099 | riboflavin (Vitamin B2)             | Cofactors and vitamins | 2.23 | 1.70 | 1.31 |
| 1105 | alpha-tocopherol                    | Cofactors and vitamins | 2.04 | 1.75 | 1.16 |
| 1123 | hippurate                           | Xenobiotics            | 0.82 | 0.46 | 1.79 |
| 1157 | glycerol 2-phosphate                | Xenobiotics            | 1.40 | 1.67 | 0.84 |
| 1175 | trizma acetate                      | Xenobiotics            | 1.06 | 1.00 | 1.06 |
|      | X - 01497                           | N/A                    | 9.94 | 4.95 | 2.01 |
|      | X - 03094                           | N/A                    | 2.05 | 1.81 | 1.13 |
|      | X - 04272                           | N/A                    | 1.03 | 0.79 | 1.29 |
|      | X - 08791                           | N/A                    | 0.84 | 0.83 | 1.02 |
|      | X - 08895                           | N/A                    | 1.45 | 1.32 | 1.1  |
|      | X - 10500                           | N/A                    | 1.34 | 1.61 | 0.84 |
|      | X - 10876                           | N/A                    | 1.93 | 2.08 | 0.93 |
|      | X - 10885                           | N/A                    | 3.45 | 2.71 | 1.27 |
|      | X - 11081                           | N/A                    | 3.68 | 1.62 | 2.27 |
|      | X - 11327                           | N/A                    | 1.95 | 1.22 | 1.59 |
|      | X - 11332                           | N/A                    | 0.42 | 0.43 | 0.98 |
|      | X - 11333                           | N/A                    | 0.62 | 0.57 | 1.07 |
|      | X - 11334                           | N/A                    | 1.07 | 0.73 | 1.47 |
|      | X - 11509                           | N/A                    | 1.48 | 0.91 | 1.64 |
|      | X - 11533                           | N/A                    | 1.18 | 1.11 | 1.07 |
|      | X - 11542                           | N/A                    | 0.95 | 1.02 | 0.94 |
|      | X - 11576                           | N/A                    | 2.01 | 1.86 | 1.08 |
|      | X - 11580                           | N/A                    | 2.68 | 1.83 | 1.47 |
|      | X - 11593                           | N/A                    | 0.54 | 1.38 | 0.39 |
|      | X - 11596                           | N/A                    | 0.56 | 0.86 | 0.65 |
|      | X - 11606                           | N/A                    | 3.09 | 1.55 | 1.99 |
|      | X - 11612                           | N/A                    | 1.01 | 0.87 | 1.16 |
|      | X - 11615                           | N/A                    | 0.73 | 1.78 | 0.41 |
|      | X - 11616                           | N/A                    | 3.12 | 6.29 | 0.5  |
|      | X - 11618                           | N/A                    | 4.33 | 3.00 | 1.44 |
|      | X - 11630                           | N/A                    | 1.00 | 1.00 | 1    |
|      | X - 11639                           | N/A                    | 0.71 | 1.09 | 0.65 |
|      | X - 11641                           | N/A                    | 0.91 | 1.16 | 0.79 |
|      | X - 11875                           | N/A                    | 1.20 | 1.18 | 1.02 |
|      | X - 12051                           | N/A                    | 0.33 | 0.80 | 0.42 |
|      | X - 12206                           | N/A                    | 0.46 | 0.88 | 0.53 |
|      | X - 12660                           | N/A                    | 0.53 | 0.95 | 0.56 |
|      | X - 12748                           | N/A                    | 1.73 | 2.03 | 0.85 |

|  |           |     |      |      |      |
|--|-----------|-----|------|------|------|
|  | X - 12776 | N/A | 1.12 | 0.83 | 1.35 |
|  | X - 12792 | N/A | 1.00 | 1.00 | 1    |
|  | X - 12854 | N/A | 0.86 | 0.96 | 0.89 |
|  | X - 12987 | N/A | 1.34 | 0.71 | 1.87 |
|  | X - 12991 | N/A | 0.78 | 0.85 | 0.91 |
|  | X - 13005 | N/A | 1.14 | 0.88 | 1.29 |
|  | X - 13007 | N/A | 2.94 | 1.24 | 2.38 |
|  | X - 13230 | N/A | 1.38 | 0.94 | 1.47 |
|  | X - 13557 | N/A | 1.29 | 1.01 | 1.27 |
|  | X - 13560 | N/A | 1.20 | 1.25 | 0.96 |
|  | X - 13872 | N/A | 1.54 | 1.42 | 1.09 |
|  | X - 13891 | N/A | 1.23 | 0.92 | 1.33 |
|  | X - 14624 | N/A | 5.70 | 0.69 | 8.23 |
|  | X - 14904 | N/A | 2.58 | 1.09 | 2.37 |
|  | X - 15156 | N/A | 3.10 | 5.64 | 0.55 |
|  | X - 15301 | N/A | 1.67 | 1.59 | 1.05 |
|  | X - 15520 | N/A | 3.44 | 2.33 | 1.48 |
|  | X - 15546 | N/A | 1.35 | 1.68 | 0.81 |
|  | X - 15605 | N/A | 2.47 | 2.36 | 1.05 |
|  | X - 15607 | N/A | 1.34 | 3.32 | 0.4  |
|  | X - 15616 | N/A | 1.09 | 0.96 | 1.14 |
|  | X - 15624 | N/A | 1.12 | 1.08 | 1.04 |
|  | X - 15808 | N/A | 1.12 | 0.96 | 1.17 |
|  | X - 15933 | N/A | 1.15 | 0.84 | 1.37 |
|  | X - 16063 | N/A | 2.77 | 1.68 | 1.65 |
|  | X - 16103 | N/A | 0.95 | 1.01 | 0.94 |
|  | X - 16209 | N/A | 1.09 | 1.04 | 1.04 |
|  | X - 16283 | N/A | 3.82 | 1.25 | 3.05 |
|  | X - 16607 | N/A | 1.79 | 1.17 | 1.53 |
|  | X - 16617 | N/A | 1.75 | 1.45 | 1.21 |
|  | X - 16786 | N/A | 1.00 | 1.00 | 1    |
|  | X - 16853 | N/A | 3.42 | 1.53 | 2.23 |
|  | X - 16968 | N/A | 2.46 | 2.21 | 1.12 |
|  | X - 17010 | N/A | 1.18 | 1.26 | 0.94 |
|  | X - 17029 | N/A | 3.90 | 1.82 | 2.14 |
|  | X - 17115 | N/A | 1.35 | 1.06 | 1.28 |
