# Supplementary material
Source: publisher figshare collection journal article supplement (https://karger.figshare.com/articles/dataset/_/5123644)
Supplement: Supplementary file 7 [file 1]

**Table S2. Number of Differentially Expressed Genes in MR and MRC Rat Tissues**

**Liver**

| Compared Treatment Groups | Number of Differentially Expressed Genes ( $p \leq 0.05$ ) | Number of Upregulated Genes    |                                | Number of Downregulated Genes   |                                 |
|---------------------------|------------------------------------------------------------|--------------------------------|--------------------------------|---------------------------------|---------------------------------|
|                           |                                                            | ( $\geq 1.0$ ; $p \leq 0.05$ ) | ( $\geq 1.5$ ; $p \leq 0.05$ ) | ( $\leq -1.0$ ; $p \leq 0.05$ ) | ( $\leq -1.5$ ; $p \leq 0.05$ ) |
| MR vs CF                  | 2170                                                       | 1210                           | 172                            | 960                             | 113                             |
| MRC vs CF                 | 1330                                                       | 932                            | 61                             | 398                             | 25                              |

**Adipose Tissue**

| Compared Treatment Groups | Number of Differentially Expressed Genes ( $p \leq 0.05$ ) | Number of Upregulated Genes    |                                | Number of Downregulated Genes   |                                 |
|---------------------------|------------------------------------------------------------|--------------------------------|--------------------------------|---------------------------------|---------------------------------|
|                           |                                                            | ( $\geq 1.0$ ; $p \leq 0.05$ ) | ( $\geq 1.5$ ; $p \leq 0.05$ ) | ( $\leq -1.0$ ; $p \leq 0.05$ ) | ( $\leq -1.5$ ; $p \leq 0.05$ ) |
| MR vs CF                  | 1483                                                       | 883                            | 123                            | 600                             | 101                             |
| MRC vs CF                 | 363                                                        | 187                            | 4                              | 176                             | 9                               |

**Skeletal Muscle**

| Compared Treatment Groups | Number of Differentially Expressed Genes ( $p \leq 0.05$ ) | Number of Upregulated Genes    |                                | Number of Downregulated Genes   |                                 |
|---------------------------|------------------------------------------------------------|--------------------------------|--------------------------------|---------------------------------|---------------------------------|
|                           |                                                            | ( $\geq 1.0$ ; $p \leq 0.05$ ) | ( $\geq 1.5$ ; $p \leq 0.05$ ) | ( $\leq -1.0$ ; $p \leq 0.05$ ) | ( $\leq -1.5$ ; $p \leq 0.05$ ) |
| MR vs CF                  | 736                                                        | 351                            | 39                             | 385                             | 41                              |
| MRC vs CF                 | 441                                                        | 292                            | 15                             | 149                             | 8                               |
