# Supplementary material
Source: publisher figshare collection journal article supplement (https://karger.figshare.com/articles/dataset/_/5123644)
Supplement: Supplementary file 8 [file 1]

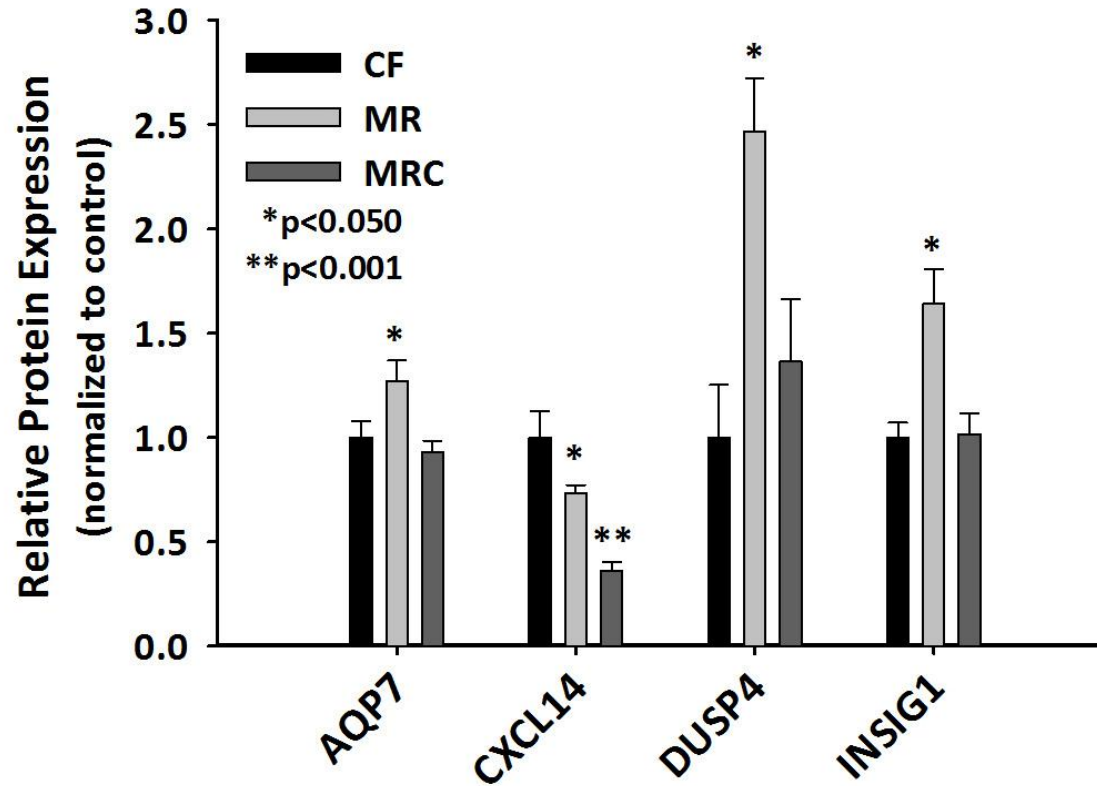

**Fig. S1.** Expression levels of selected proteins in inguinal adipose tissue from CF-, MR- and MRC-fed rats. Values are expressed as the mean  $\pm$  SEM of 6-8 samples and analyzed by One-way ANOVA.
