# Supplementary material
Source: publisher figshare collection journal article supplement (https://karger.figshare.com/articles/dataset/_/5123644)
Supplement: Supplementary file 9 [file 1]

| Adipose Tissue                       |                       | Liver                              |                       | Skeletal Muscle                      |                       |
|--------------------------------------|-----------------------|------------------------------------|-----------------------|--------------------------------------|-----------------------|
| Pathway                              | MRC vs CF             | Pathway                            | MRC vs CF             | Pathway                              | MRC vs CF             |
| <b><i>Upregulated</i></b>            | <b><i>p-value</i></b> | <b><i>Upregulated</i></b>          | <b><i>p-value</i></b> | <b><i>Upregulated</i></b>            | <b><i>p-value</i></b> |
| Ephrin                               | 0.0030                | Mono-di-carboxylate import         | 0.0029                | Respiratory chain                    | 5.37E-10              |
| Glycogen degradation                 | 0.0481                | Glut-Gln-Pro metabolism            | 0.0072                | Fatty acid oxidation                 | 4.16E-06              |
|                                      |                       | Translation                        | 0.0088                | Translation                          | 0.0005                |
|                                      |                       | Co-translational ER protein import | 0.0148                | INS                                  | 0.0022                |
|                                      |                       | Nuclear export                     | 0.0174                | ROS catabolism                       | 0.0134                |
| <b><i>Downregulated</i></b>          |                       | Tetraspanin                        | 0.0175                | Intermediate filament polymerization | 0.0136                |
| Intermediate filament polymerization | 3.23E-07              | ARF                                | 0.0257                | Glycosylation in Golgi               | 0.0164                |
| Branched amino acid metabolism       | 0.0002                | Chemokines                         | 0.0278                | ITGL                                 | 0.0221                |
| Triacylglycerol biosynthesis         | 0.0028                | Protein folding                    | 0.0306                | DUSP                                 | 0.0234                |
| Respiratory chain                    | 0.0078                | IGFBP                              | 0.0311                | GPCR-GiCR                            | 0.0278                |
| Fatty acid oxidation                 | 0.0097                | Protein nucleus import             | 0.0373                | Gap junction assembly                | 0.0417                |
| FZD                                  | 0.0160                |                                    |                       | SOX                                  | 0.0450                |
| IGFBP                                | 0.0190                | <b><i>Downregulated</i></b>        |                       | CDKN                                 | 0.0479                |
| Water transport                      | 0.0231                | Cholesterol-isoprenoid metabolism  | 0.0009                |                                      |                       |
| Aromatic amino acid metabolism       | 0.0306                | Twist-like                         | 0.0297                | <b><i>Downregulated</i></b>          |                       |
| Extracellular matrix polymerization  | 0.0328                | RGS                                | 0.0403                | INSR                                 | 0.0253                |
| Glucose metabolism                   | 0.0348                | GPCR-Gq-iCR                        | 0.0436                | Coagulation factor                   | 0.0256                |
| Desmosome assembly                   | 0.0368                |                                    |                       | Ras                                  | 0.0460                |
| GPCR-Other                           | 0.0385                |                                    |                       |                                      |                       |
| INS                                  | 0.0441                |                                    |                       |                                      |                       |

**Table S4. Biological processes identified from enrichment analysis of genes upregulated or downregulated by 1.5-fold and  $p < 0.05$  using Fisher’s exact test in adipose tissue, liver and skeletal muscle from MRC rats compared to CF rats.**
