# Supplementary material
Source: publisher figshare collection journal article supplement (https://karger.figshare.com/articles/dataset/_/5123644)
Supplement: Supplementary file 10 [file 1]

**Table S6. Confirmation of Gene Expression by qPCR in Liver**

| Gene           | Fold-Change |              |                |              |                |
|----------------|-------------|--------------|----------------|--------------|----------------|
|                | CF          | MR           | <i>P value</i> | MRC          | <i>P value</i> |
| <i>Acacb</i>   | 1.00 ± 0.09 | 0.32 ± 0.04  | <0.001*        | 0.29 ± 0.03  | <0.001*        |
| <i>Acly</i>    | 1.00 ± 0.19 | 0.49 ± 0.07  | 0.026*         | 0.51 ± 0.07  | 0.019*         |
| <i>Aco2</i>    | 1.00 ± 0.02 | 2.48 ± 0.12  | <0.001*        | 0.92 ± 0.05  | 0.433          |
| <i>Agpat9</i>  | 1.00 ± 0.10 | 34.16 ± 5.74 | <0.001*        | 1.92 ± 1.01  | 0.840          |
| <i>Aqp8</i>    | 1.00 ± 0.04 | 2.36 ± 0.11  | <0.001*        | 1.15 ± 0.06  | 0.172          |
| <i>Asns</i>    | 1.00 ± 0.15 | 4.48 ± 0.21  | <0.001*        | 1.06 ± 0.11  | 0.788          |
| <i>Atf3</i>    | 1.00 ± 0.17 | 1.61 ± 0.29  | 0.648          | 1.40 ± 0.55  | 0.727          |
| <i>Atf4</i>    | 1.00 ± 0.06 | 2.07 ± 0.10  | <0.001*        | 0.89 ± 0.07  | 0.350          |
| <i>Atf6</i>    | 1.00 ± 0.03 | 1.58 ± 0.10  | <0.001*        | 0.79 ± 0.03  | 0.021          |
| <i>CD36</i>    | 1.00 ± 0.26 | 8.30 ± 0.92  | <0.001*        | 0.49 ± 0.04  | 0.493          |
| <i>Cebpb</i>   | 1.00 ± 0.14 | 1.37 ± 0.06  | 0.049          | 0.91 ± 0.10  | 0.565          |
| <i>Crot</i>    | 1.00 ± 0.08 | 0.57 ± 0.08  | <0.001*        | 0.26 ± 0.04  | <0.001*        |
| <i>Ctps</i>    | 1.00 ± 0.08 | 4.91 ± 0.41  | <0.001*        | 1.72 ± 0.23  | 0.074          |
| <i>Cxcl12</i>  | 1.00 ± 0.05 | 0.51 ± 0.05  | 0.004*         | 1.21 ± 0.14  | 0.129          |
| <i>Cyp17a1</i> | 1.00 ± 0.16 | 2.55 ± 0.20  | <0.001*        | 0.95 ± 0.08  | 0.806          |
| <i>Dutp</i>    | 1.00 ± 0.03 | 1.69 ± 0.07  | <0.001*        | 1.11 ± 0.03  | 0.101          |
| <i>Eif2ak3</i> | 1.00 ± 0.10 | 1.08 ± 0.12  | 0.579          | 0.84 ± 0.07  | 0.460          |
| <i>Eif2ak4</i> | 1.00 ± 0.05 | 0.95 ± 0.06  | 0.429          | 0.60 ± 0.03  | <0.001*        |
| <i>Eif2s1</i>  | 1.00 ± 0.02 | 1.97 ± 0.07  | <0.001*        | 1.02 ± 0.04  | 0.741          |
| <i>Elovl2</i>  | 1.00 ± 0.04 | 1.02 ± 0.05  | 0.732          | 0.44 ± 0.03  | <0.001*        |
| <i>Elovl5</i>  | 1.00 ± 0.03 | 0.71 ± 0.02  | <0.001*        | 0.66 ± 0.04  | <0.001*        |
| <i>Fgf1</i>    | 1.00 ± 0.06 | 0.57 ± 0.04  | <0.001*        | 1.13 ± 0.07  | 0.119          |
| <i>Fgf21</i>   | 1.00 ± 0.15 | 16.07 ± 2.26 | <0.001*        | 1.24 ± 0.32  | 0.892          |
| <i>Fzd4</i>    | 1.00 ± 0.04 | 0.93 ± 0.08  | 0.477          | 0.53 ± 0.07  | <0.001*        |
| <i>Gadd45a</i> | 1.00 ± 0.23 | 2.91 ± 0.20  | <0.001*        | 0.73 ± 1.00  | 0.296          |
| <i>Gas5</i>    | 1.00 ± 0.02 | 3.19 ± 0.18  | <0.001*        | 0.83 ± 0.09  | 0.310          |
| <i>Gck</i>     | 1.00 ± 0.19 | 0.21 ± 0.07  | 0.009*         | 0.66 ± 0.18  | 0.150          |
| <i>Gclm</i>    | 1.00 ± 0.11 | 2.38 ± 0.22  | <0.001*        | 1.58 ± 0.15  | 0.022*         |
| <i>Gldc</i>    | 1.00 ± 0.10 | 2.29 ± 0.13  | <0.001*        | 0.99 ± 0.10  | 0.961          |
| <i>Hadha</i>   | 1.00 ± 0.03 | 1.39 ± 0.06  | <0.001*        | 0.76 ± 0.04  | 0.001*         |
| <i>Hadhb</i>   | 1.00 ± 0.04 | 2.34 ± 0.11  | <0.001*        | 0.76 ± 0.04  | 0.022*         |
| <i>Igfals</i>  | 1.00 ± 0.06 | 0.60 ± 0.04  | <0.001*        | 1.09 ± 0.08  | 0.303          |
| <i>Igfbp1</i>  | 1.00 ± 0.16 | 19.32 ± 2.99 | <0.001*        | 0.78 ± 0.11  | 0.926          |
| <i>Igfbp3</i>  | 1.00 ± 0.07 | 0.74 ± 0.04  | 0.039*         | 1.08 ± 0.08  | 0.426          |
| <i>Insig1</i>  | 1.00 ± 0.08 | 0.59 ± 0.13  | 0.011*         | 0.36 ± 0.04  | <0.001*        |
| <i>Lars</i>    | 1.00 ± 0.04 | 2.52 ± 0.11  | <0.001*        | 0.99 ± 0.06  | 0.885          |
| <i>Lipc</i>    | 1.00 ± 0.03 | 0.57 ± 0.02  | <0.001*        | 0.75 ± 0.04  | <0.001*        |
| <i>Mcee</i>    | 1.00 ± 0.12 | 0.71 ± 0.03  | 0.079          | 0.88 ± 0.07  | 0.323          |
| <i>Me1</i>     | 1.00 ± 0.15 | 2.73 ± 0.25  | <0.001*        | 0.25 ± 0.02  | 0.004*         |
| <i>Mybbp1a</i> | 1.00 ± 0.04 | 3.23 ± 0.19  | <0.001*        | 1.17 ± 0.10  | 0.336          |
| <i>Niban</i>   | 1.00 ± 0.05 | 14.31 ± 0.62 | <0.001*        | 2.16 ± 0.35  | 0.057          |
| <i>Nox4</i>    | 1.00 ± 0.14 | 0.42 ± 0.10  | 0.017*         | 1.27 ± 0.16  | 0.171          |
| <i>Odc1</i>    | 1.00 ± 0.06 | 3.28 ± 0.17  | <0.001*        | 1.39 ± 0.09  | 0.024*         |
| <i>Pbsn</i>    | 1.00 ± 0.28 | 3.20 ± 0.89  | 0.810          | 39.38 ± 9.79 | <0.001*        |
| <i>Pck1</i>    | 1.00 ± 0.10 | 1.73 ± 0.23  | 0.028*         | 1.14 ± .166  | 0.574          |

|                 |             |              |         |             |         |
|-----------------|-------------|--------------|---------|-------------|---------|
| <i>Pck2</i>     | 1.00 ± 0.03 | 6.89 ± 0.34  | <0.001* | 1.18 ± 0.05 | 0.507   |
| <i>Phgdh</i>    | 1.00 ± 0.11 | 9.50 ± 0.40  | <0.001* | 1.23 ± 0.14 | 0.471   |
| <i>Pik3c3</i>   | 1.00 ± 0.06 | 0.87 ± 0.03  | 0.233   | 1.15 ± 0.11 | 0.339   |
| <i>Pklr</i>     | 1.00 ± 0.10 | 0.78 ± 0.05  | 0.109   | 0.97 ± 0.06 | 0.732   |
| <i>Pnpla3</i>   | 1.00 ± 0.37 | 0.03 ± 0.01  | 0.007*  | 0.04 ± 0.01 | 0.009*  |
| <i>Ppat</i>     | 1.00 ± 0.07 | 2.64 ± 0.13  | <0.001* | 1.33 ± 0.13 | 0.058   |
| <i>Ppp1r3b</i>  | 1.00 ± 0.15 | 0.55 ± 0.11  | <0.040* | 0.82 ± 0.09 | 0.260   |
| <i>Prss15</i>   | 1.00 ± 0.03 | 1.93 ± 0.11  | <0.001* | 0.85 ± 0.04 | 0.116   |
| <i>Slc16a10</i> | 1.00 ± 0.06 | 0.45 ± 0.06  | <0.001* | 0.47 ± 0.08 | <0.001* |
| <i>Slc25a21</i> | 1.00 ± 0.11 | 3.71 ± 0.26  | <0.001* | 0.39 ± 0.04 | 0.013*  |
| <i>Slc38a2</i>  | 1.00 ± 0.10 | 2.10 ± 0.33  | 0.003*  | 1.04 ± 0.09 | 0.891   |
| <i>Slc6a6</i>   | 1.00 ± 0.16 | 0.08 ± 0.004 | <0.001* | 0.76 ± 0.17 | 0.226   |
| <i>Slc7a1</i>   | 1.00 ± 0.37 | 11.87 ± 0.06 | <0.001* | 1.93 ± 0.53 | 0.428   |
| <i>Srm</i>      | 1.00 ± 0.04 | 3.55 ± 0.21  | <0.001* | 1.25 ± 0.09 | 0.195   |
| <i>Tat</i>      | 1.00 ± 0.19 | 2.18 ± 0.33  | 0.004*  | 0.78 ± 0.12 | 0.495   |
| <i>Trib3</i>    | 1.00 ± 0.26 | 20.65 ± 1.73 | <0.001* | 1.37 ± 0.18 | 0.788   |
| <i>Umps</i>     | 1.00 ± 0.03 | 3.02 ± 0.17  | <0.001* | 1.19 ± 0.07 | 0.210   |
| <i>Vldlr</i>    | 1.00 ± 0.10 | 92.78 ± 6.20 | <0.001* | 1.92 ± 0.58 | 0.850   |

Values are expressed as the fold-change compared to CF rats and analyzed by One-way ANOVA.

\*Significantly different compared to CF rats;  $p < 0.05$ .
