# Supplementary material
Source: publisher figshare collection journal article supplement (https://karger.figshare.com/articles/dataset/_/5123644)
Supplement: Supplementary file 11 [file 1]

Archive with 13 entries (13 files):
- 000339347_sm_Figure_S1.pdf
- 000339347_sm_Table_S8.pdf
- 000339347_sm_Table_S7.pdf
- 000339347_sm_Table_S6.pdf
- 000339347_sm_Table_S5.pdf
- 000339347_sm_Table_S4.pdf
- 000339347_sm_Table_S3.pdf
- 000339347_sm_Table_S2.pdf
- 000339347_sm_Table_S11.pdf
- 000339347_sm_Table_S10.pdf
- 000339347_sm_Table_S1.pdf
- 000339347_sm_Figure_S2.pdf
- 000339347_sm_Table_S9.pdf
