# Supplementary material
Source: publisher figshare collection journal article supplement (https://karger.figshare.com/articles/dataset/_/5123644)
Supplement: Supplementary file 11 [file 1 › 000339347_sm_Figure_S2.pdf]

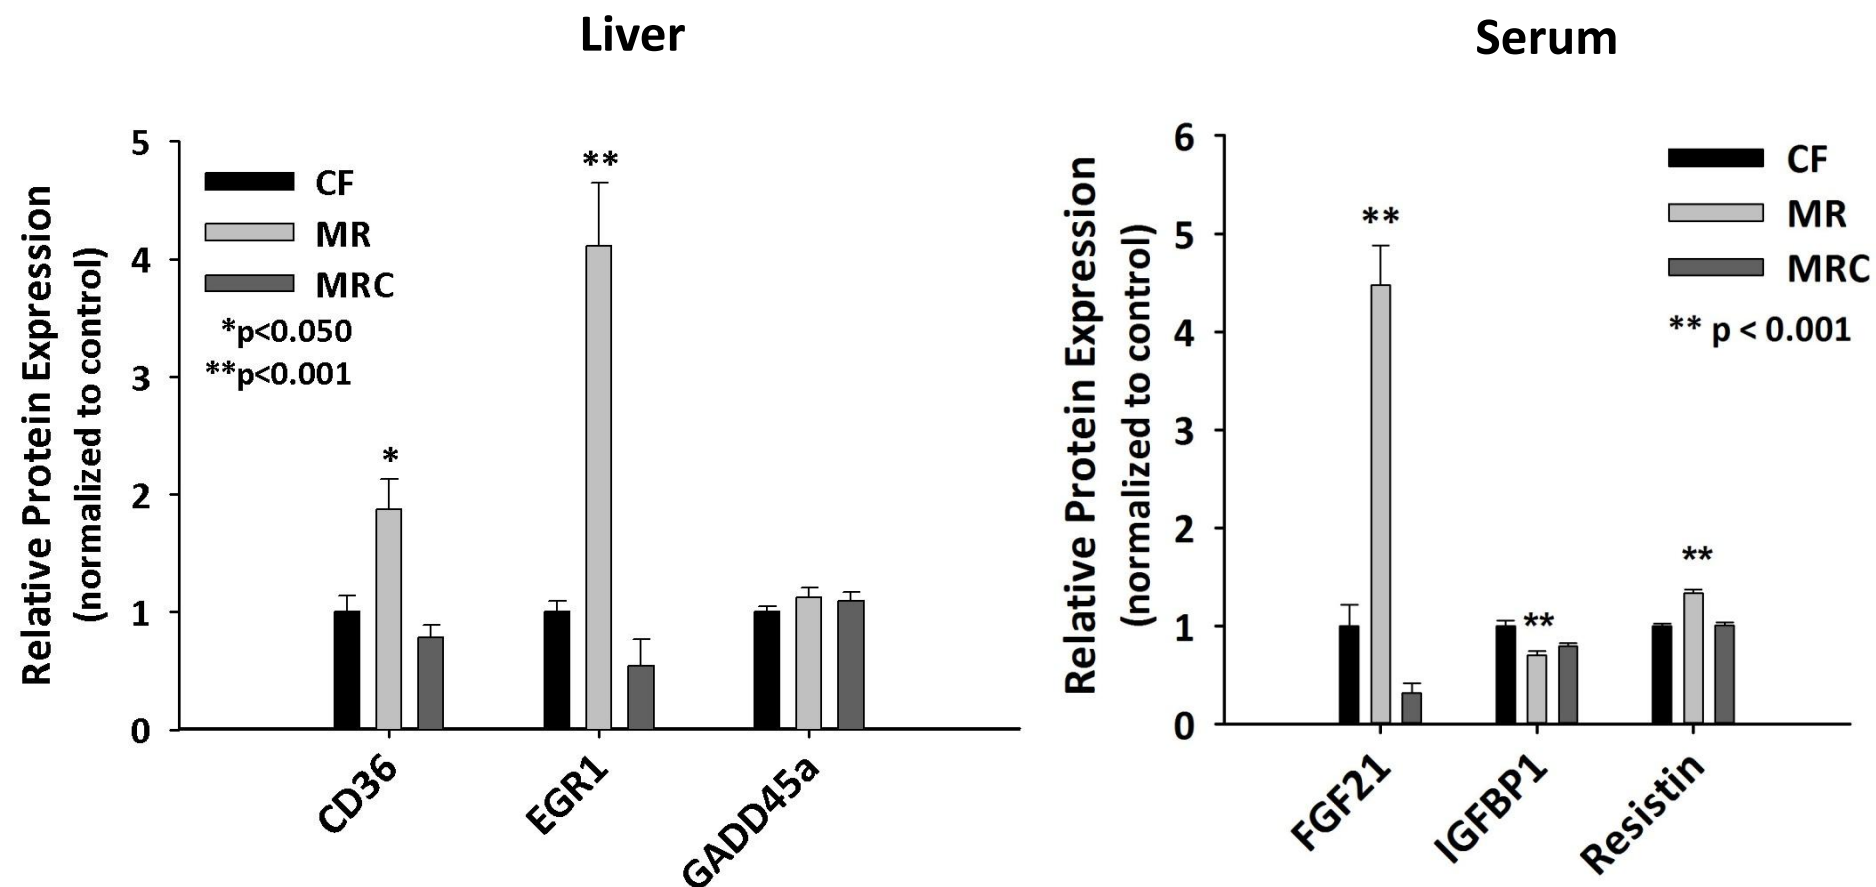

**Fig. S2.** Expression levels of selected liver proteins and proteins released from tissues into serum from CF-, MR- and MRC-fed rats. Values are expressed as the mean  $\pm$  SEM of 6-8 samples and analyzed by One-way ANOVA.
