# Supplementary material
Source: publisher figshare collection journal article supplement (https://karger.figshare.com/articles/dataset/_/5123644)
Supplement: Supplementary file 11 [file 1 › 000339347_sm_Table_S3.pdf]

**Table S3a.**  
**Genes Upregulated in Adipose Tissue by MR (Normalized to Control)**

| Gene Symbol             | Gene name                                                             | MR   | p value  | MRC   | p value  | Function                                                                                           |
|-------------------------|-----------------------------------------------------------------------|------|----------|-------|----------|----------------------------------------------------------------------------------------------------|
| <i>Lipid Metabolism</i> |                                                                       |      |          |       |          |                                                                                                    |
| ELOVL6                  | ELOVL family member 6                                                 | 4.04 | 3.12E-05 | -1.39 | 1.16E-02 | Uses malonyl-CoA as a 2-carbon donor in the first and rate-limiting step of fatty acid elongation. |
| ACACA                   | Acetyl-CoA carboxylase alpha                                          | 3.35 | 3.33E-06 | -1.28 | 1.61E-01 | Carboxylation of acetyl-CoA to malonyl-CoA, the rate-limiting step in fatty acid synthesis.        |
| GPAM                    | Glycerol-3-phosphate acyltransferase, mitochondrial                   | 2.78 | 4.39E-05 | -1.20 | 1.35E-01 | Initial and committing step in glycerolipid biosynthesis.                                          |
| SCD                     | Stearoyl-CoA desaturase (delta-9-desaturase)                          | 2.66 | 1.76E-04 | -1.22 | 3.02E-01 | Rate-limiting step in the synthesis of unsaturated fatty acids.                                    |
| ACSM5                   | Acyl-CoA synthetase medium-chain family member 5                      | 2.48 | 1.57E-05 | -1.04 | 4.31E-01 | Unknown                                                                                            |
| LGALS12                 | Lectin, galactoside-binding, soluble, 12                              | 2.22 | 2.01E-04 | -1.02 | 8.42E-01 | A primary regulator of the early stages of adipose tissue development.                             |
| ACAT2                   | Acetyl-CoA acetyltransferase 2                                        | 1.90 | 1.05E-03 | -1.21 | 3.04E-01 | Lipid metabolism, cytosolic acetoacetyl-CoA thiolase.                                              |
| INSIG1                  | Insulin induced gene 1                                                | 1.87 | 6.68E-04 | -1.08 | 6.58E-01 | Regulates cholesterol concentrations in cells.                                                     |
| PNPLA3                  | Patatin-like phospholipase domain containing 3                        | 1.81 | 1.27E-04 | -1.00 | 9.94E-01 | Mediates triacylglycerol hydrolysis in adipocytes.                                                 |
| CPT1B                   | Carnitine palmitoyltransferase 1B (muscle)                            | 1.80 | 1.16E-03 | 1.02  | 8.19E-01 | Rate-controlling enzyme of the long-chain fatty acid beta-oxidation pathway in mitochondria.       |
| HSD17B12                | Hydroxysteroid (17-beta) dehydrogenase 12                             | 1.79 | 5.17E-05 | -1.21 | 8.16E-02 | Reduces 3-ketoacyl-CoA to 3-hydroxyacyl-CoA during the second step of fatty acid elongation.       |
| RETN                    | Resistin                                                              | 1.77 | 2.91E-02 | -1.36 | 2.48E-01 | Hormone secreted by adipocytes.                                                                    |
| PPARGC1A                | Peroxisome proliferator-activated receptor gamma, coactivator 1 alpha | 1.76 | 1.28E-04 | -1.08 | 5.22E-01 | Regulates the genes involved in energy metabolism.                                                 |
| LPIN1                   | Lipin 1                                                               | 1.73 | 3.65E-05 | -1.12 | 3.92E-02 | Normal adipose tissue development.                                                                 |
| ACSL1                   | Acyl-CoA synthetase long-chain family member 1                        | 1.72 | 3.80E-03 | -1.16 | 4.35E-01 | Converts free long-chain fatty acids into fatty acyl-CoA esters.                                   |
| LIPE                    | Lipase, hormone-sensitive                                             | 1.71 | 1.48E-02 | -1.12 | 6.21E-01 | Hydrolyzes stored triglycerides to free fatty acids.                                               |
| ACLY                    | ATP citrate lyase                                                     | 1.68 | 1.02E-02 | -1.27 | 2.42E-01 | Formation of acetyl-CoA and oxaloacetate from citrate and CoA.                                     |
| GPD1                    | Glycerol-3-phosphate dehydrogenase 1 (soluble)                        | 1.65 | 6.64E-03 | -1.15 | 3.66E-01 | Mitochondrial glycerol 3-phosphate dehydrogenase.                                                  |
| DGAT2                   | Diacylglycerol O-acyltransferase 2                                    | 1.62 | 2.66E-02 | -1.13 | 5.68E-01 | Synthesis of triglycerides.                                                                        |

|                                |                                                       |      |          |       |          |                                                                                                 |
|--------------------------------|-------------------------------------------------------|------|----------|-------|----------|-------------------------------------------------------------------------------------------------|
| MGLL                           | Monoglyceride lipase                                  | 1.61 | 1.53E-02 | -1.12 | 6.10E-01 | Hydrolyzes intracellular triglyceride stores in adipocytes to fatty acids and glycerol.         |
| CLYBL                          | Citrate lyase beta-like                               | 1.52 | 1.00E-04 | -1.13 | 8.46E-02 | Unknown                                                                                         |
| <i>Carbohydrate Metabolism</i> |                                                       |      |          |       |          |                                                                                                 |
| GYS2                           | Glycogen synthase 2 (liver)                           | 3.00 | 8.42E-07 | 1.09  | 7.78E-01 | Rate-limiting step in the synthesis of glycogen.                                                |
| PYGL                           | Phosphorylase, glycogen, liver                        | 2.33 | 1.73E-04 | -1.12 | 5.00E-01 | Releases glucose-1-phosphate from glycogen stores.                                              |
| PDHB                           | Pyruvate dehydrogenase (lipoamide) beta               | 1.80 | 1.53E-05 | -1.16 | 9.28E-02 | Catalyzes the conversion of pyruvate to acetyl-CoA and CO <sub>2</sub> .                        |
| GCGR                           | Glucagon receptor                                     | 1.79 | 5.00E-04 | 1.03  | 5.78E-01 | Controls blood glucose levels.                                                                  |
| PCK1                           | Phosphoenolpyruvate carboxykinase 1 (soluble)         | 1.78 | 4.95E-02 | -1.18 | 5.75E-01 | Formation of phosphoenolpyruvate from oxaloacetate.                                             |
| IDH3A                          | Isocitrate dehydrogenase 3 (NAD+) alpha               | 1.76 | 1.42E-04 | -1.09 | 4.10E-01 | Decarboxylation of isocitrate to 2-oxoglutarate.                                                |
| LDHA                           | Lactate dehydrogenase A                               | 1.74 | 1.63E-03 | 1.11  | 1.60E-01 | Conversion of L-lactate and NAD to pyruvate and NADH in the final step of anaerobic glycolysis. |
| PDK1                           | Pyruvate dehydrogenase kinase, isozyme 1              | 1.72 | 6.53E-05 | -1.15 | 3.26E-02 | Oxidative decarboxylation of pyruvate.                                                          |
| PC                             | Pyruvate carboxylase                                  | 1.71 | 1.04E-03 | -1.33 | 2.59E-02 | Carboxylation of pyruvate to oxaloacetate.                                                      |
| PFKM                           | Phosphofructokinase, muscle                           | 1.65 | 4.22E-02 | 1.21  | 2.51E-01 | Phosphorylation of fructose-6-phosphate to fructose-1,6-bisphosphate.                           |
| PFKFB3                         | 6-Phosphofructo-2-kinase/fructose-2,6-biphosphatase 3 | 1.61 | 2.23E-02 | -1.23 | 3.08E-01 | Biosynthesis and degradation of fructose 2,6-bisphosphate.                                      |
| MDH1                           | Malate dehydrogenase 1, NAD (soluble)                 | 1.57 | 9.36E-04 | -1.17 | 1.39E-01 | Oxidation of malate to oxaloacetate.                                                            |
| MDH2                           | Malate dehydrogenase 2, NAD (mitochondrial)           | 1.57 | 2.74E-04 | -1.04 | 6.51E-01 | Reversible oxidation of malate to oxaloacetate.                                                 |
| PFKFB1                         | 6-Phosphofructo-2-kinase/fructose-2,6-biphosphatase 1 | 1.57 | 9.89E-03 | -1.16 | 3.27E-01 | Synthesis and degradation of fructose-2,6-biphosphate.                                          |
| ACO2                           | Aconitase 2, mitochondrial                            | 1.56 | 9.15E-04 | -1.08 | 3.70E-01 | Interconversion of citrate to isocitrate.                                                       |
| <i>Amino Acid Metabolism</i>   |                                                       |      |          |       |          |                                                                                                 |
| AADAT                          | Aminoadipate aminotransferase                         | 2.87 | 1.40E-06 | -1.01 | 9.35E-01 | L-lysine catabolism and the transamination of kynurenine to produce kynurenine acid.            |
| PSAT1                          | Phosphoserine aminotransferase 1                      | 1.85 | 1.11E-03 | -1.18 | 1.92E-01 | Phosphoserine aminotransferase                                                                  |
| ASPA                           | Aspartoacylase                                        | 1.67 | 2.67E-03 | -1.18 | 2.66E-01 | Conversion of N-acetyl_L-aspartic acid (NAA) to aspartate and acetate.                          |
| FAH                            | Fumarylacetoacetate hydrolase (fumarylacetoacetase)   | 1.65 | 7.01E-03 | -1.10 | 5.20E-01 | Last enzyme in the tyrosine catabolism pathway.                                                 |

*Nucleotide/Nucleoside Metabolism*

|       |                                     |      |          |      |          |                                                                                    |
|-------|-------------------------------------|------|----------|------|----------|------------------------------------------------------------------------------------|
| AMPD1 | Adenosine monophosphate deaminase 1 | 3.32 | 3.26E-02 | 1.37 | 5.20E-01 | Deamination of AMP to IMP, plays an important role in the purine nucleotide cycle. |
|-------|-------------------------------------|------|----------|------|----------|------------------------------------------------------------------------------------|

*Metabolism Oxidation/Reduction*

|      |                      |      |          |       |          |                                                                                                            |
|------|----------------------|------|----------|-------|----------|------------------------------------------------------------------------------------------------------------|
| CBR1 | Carbonyl reductase 1 | 4.51 | 3.44E-06 | -1.12 | 4.89E-01 | NADPH-dependent oxidoreductases with wide specificity for carbonyl compounds.                              |
| CBR3 | Carbonyl reductase 3 | 2.37 | 1.19E-07 | -1.05 | 6.76E-01 | Reduction of biologically and pharmacologically active carbonyl compounds to their corresponding alcohols. |
| CBR1 | Carbonyl reductase 1 | 1.95 | 1.98E-03 | -1.34 | 7.54E-02 | NADPH-dependent oxidoreductase with wide specificity to carbonyl compounds.                                |
| MAOB | Monoamine oxidase B  | 1.91 | 3.46E-03 | 1.24  | 2.38E-01 | Oxidative deamination of biogenic and xenobiotic amines.                                                   |

*Transport*

|         |                                                                                           |      |          |       |          |                                                                                                                                                                                                  |
|---------|-------------------------------------------------------------------------------------------|------|----------|-------|----------|--------------------------------------------------------------------------------------------------------------------------------------------------------------------------------------------------|
| SLC36A2 | Solute carrier family 36 (proton/amino acid symporter), member 2                          | 2.30 | 7.62E-04 | -1.03 | 8.34E-01 | Regulates pH-dependent, Na(+)-independent uptake of glycine, proline, and alpha(methyl)aminoisobutyric acid.                                                                                     |
| AQP7    | Aquaporin 7                                                                               | 1.93 | 2.97E-03 | -1.20 | 4.18E-01 | Facilitates water, glycerol and urea transport.                                                                                                                                                  |
| SLC2A4  | Solute carrier family 2 (facilitated glucose transporter), member 4                       | 1.89 | 8.20E-04 | -1.03 | 7.91E-01 | Glucose transport.                                                                                                                                                                               |
| SLC22A3 | Solute carrier family 22 (extraneuronal monoamine transporter), member 3                  | 1.85 | 5.10E-03 | 1.02  | 8.95E-01 | Organic cation transporters.                                                                                                                                                                     |
| SORL1   | Sortilin-related receptor, L(DLR class) A repeats-containing                              | 1.81 | 6.34E-05 | -1.08 | 3.30E-01 | Belongs to the families of vacuolar protein sorting 10 (VPS10) domain-containing receptor proteins, low density lipoprotein receptor (LDLR) proteins, and fibronectin type III repeats proteins. |
| ATP1A2  | ATPase, Na+/K+ transporting, alpha 2 polypeptide                                          | 1.77 | 1.77E-02 | -1.05 | 7.79E-01 | Subfamily of Na+/K+ -ATPases responsible for establishing and maintaining the electrochemical gradients of Na and K ions across the plasma membrane.                                             |
| KCNN3   | Potassium intermediate/small conductance calcium-activated channel, subfamily N, member 3 | 1.60 | 1.25E-02 | -1.03 | 8.16E-01 | Member of the KCNN family of potassium channels, is activated before membrane hyperpolarization.                                                                                                 |

|                            |          |                                                                          |      |          |       |          |                                                                                                                                                                            |
|----------------------------|----------|--------------------------------------------------------------------------|------|----------|-------|----------|----------------------------------------------------------------------------------------------------------------------------------------------------------------------------|
|                            | SLC25A30 | Solute carrier family 25, member 30                                      | 1.59 | 1.38E-02 | -1.02 | 8.76E-01 | Transport of solutes across the inner mitochondrial membrane.                                                                                                              |
|                            | NHEDC2   | Na <sup>+</sup> /H <sup>+</sup> exchanger domain containing 2            | 1.58 | 7.80E-05 | -1.00 | 9.61E-01 | Sodium hydrogen antiporter.                                                                                                                                                |
| <i>Immune Response</i>     |          |                                                                          |      |          |       |          |                                                                                                                                                                            |
|                            | MIF      | Macrophage migration inhibitory factor (glycosylation-inhibiting factor) | 3.43 | 1.70E-04 | 1.37  | 2.07E-01 | Lymphokine involved in cell-mediated immunity, immunoregulation, and inflammation.                                                                                         |
|                            | CXCL13   | Chemokine (C-X-C motif) ligand 13                                        | 2.56 | 1.32E-02 | 1.39  | 2.99E-01 | B lymphocyte chemoattractant.                                                                                                                                              |
|                            | MPO      | Myeloperoxidase                                                          | 1.73 | 1.00E-02 | -1.06 | 7.57E-01 | Produces hypohalous acids central to the microbicidal activity of neutrophils.                                                                                             |
|                            | CXCL14   | Chemokine (C-X-C motif) ligand 14                                        | 1.60 | 2.33E-03 | -1.15 | 4.12E-01 | Involved in immunoregulatory and inflammatory processes, displays chemotactic activity for monocytes but not for lymphocytes.                                              |
|                            | MMD      | Monocyte to macrophage differentiation-associated                        | 1.57 | 9.74E-05 | -1.12 | 1.34E-01 | Expressed by in vitro differentiated macrophages but not freshly isolated monocytes.                                                                                       |
| <i>Signal Transduction</i> |          |                                                                          |      |          |       |          |                                                                                                                                                                            |
|                            | DUSP4    | Dual specificity phosphatase 4                                           | 1.81 | 2.27E-04 | 1.09  | 4.02E-01 | Negative regulation of mitogen-activated protein (MAP) kinase superfamily (MAPK/ERK, SAPK/JNK, p38), which are associated with cellular proliferation and differentiation. |
|                            | RGS7     | Regulator of G-protein signaling 7                                       | 1.73 | 2.14E-03 | -1.31 | 2.04E-02 | GTPase activating protein.                                                                                                                                                 |
|                            | ACVR1C   | Activin A receptor, type IC                                              | 1.67 | 1.87E-02 | -1.06 | 7.09E-01 | A type I receptor for the TGFB family of signaling molecules.                                                                                                              |
|                            | PDE3B    | Phosphodiesterase 3B, cGMP-inhibited                                     | 1.65 | 2.03E-03 | -1.13 | 2.43E-01 | Hydrolysis of cAMP and cGMP.                                                                                                                                               |
|                            | TSHR     | Thyroid stimulating hormone receptor                                     | 1.56 | 1.69E-02 | -1.12 | 5.33E-01 | Major controller of thyroid cell metabolism.                                                                                                                               |
|                            | SUCNR1   | Succinate receptor 1                                                     | 1.54 | 3.23E-02 | -1.23 | 2.24E-01 | G-protein-coupled receptor for succinate.                                                                                                                                  |
| <i>Others</i>              |          |                                                                          |      |          |       |          |                                                                                                                                                                            |
|                            | MYL1     | Myosin, light chain 1, alkali; skeletal, fast                            | 4.41 | 4.46E-02 | 1.27  | 7.44E-01 | Myosin alkali light chain expressed in fast skeletal muscle.                                                                                                               |
|                            | CA5B     | Carbonic anhydrase VB, mitochondrial                                     | 2.53 | 1.50E-06 | -1.09 | 4.49E-01 | Reversible hydration of carbon dioxide.                                                                                                                                    |
|                            | TTPA     | Tocopherol (alpha) transfer protein                                      | 2.34 | 1.03E-03 | -1.06 | 6.29E-01 | Binds alpha-trocopherol, a form of vitamin E.                                                                                                                              |
|                            | BCHE     | Butyrylcholinesterase                                                    | 2.10 | 1.65E-05 | -1.18 | 1.54E-01 | Responsible for suxamethonium sensitivity.                                                                                                                                 |

|          |                                                                  |      |          |       |          |                                                                                                           |
|----------|------------------------------------------------------------------|------|----------|-------|----------|-----------------------------------------------------------------------------------------------------------|
| B3GALT1  | UDP-Gal:betaGlcNAc beta 1,3-galactosyltransferase, polypeptide 1 | 2.08 | 5.78E-03 | -1.04 | 7.83E-01 | Type II membrane-bound glycoproteins                                                                      |
| C10orf58 | Chromosome 10 open reading frame 58                              | 2.07 | 6.36E-04 | -1.04 | 6.97E-01 | Unknown                                                                                                   |
| Pdha1    | Pyruvate dehydrogenase (lipoamide) alpha 1                       | 1.76 | 1.09E-05 | -1.09 | 3.78E-01 | Catalyzes the interconversion of pyruvate and lipoamide to S-acetyldihydrolipoamide and CO <sub>2</sub> . |
| ABCD2    | ATP-binding cassette, sub-family D (ALD), member 2               | 1.74 | 7.72E-03 | -1.32 | 1.30E-01 | Member of the superfamily of ATP-binding cassette (ABC) transporter.                                      |
| CA4      | Carbonic anhydrase IV                                            | 1.67 | 5.99E-04 | -1.22 | 1.11E-01 | Reversible hydration of carbon dioxide.                                                                   |

**Table S3b.**  
**Genes Downregulated in Adipose Tissue by MR (Normalized to Control)**

| Gene Symbol                             |  | Gene name                                                                         | MR    | p value  | MRC   | p value  | Function                                                                     |
|-----------------------------------------|--|-----------------------------------------------------------------------------------|-------|----------|-------|----------|------------------------------------------------------------------------------|
| <i>Lipid Metabolism</i>                 |  |                                                                                   |       |          |       |          |                                                                              |
| FABP3                                   |  | Fatty acid binding protein 3, muscle and heart                                    | -2.96 | 2.84E-02 | -1.27 | 5.29E-01 | Uptake, intracellular metabolism and/or transport of long-chain fatty acids. |
| <i>Amino Acid Metabolism</i>            |  |                                                                                   |       |          |       |          |                                                                              |
| SAT1                                    |  | Spermidine/spermine N1-acetyltransferase 1                                        | -1.70 | 1.47E-02 | -1.15 | 3.72E-01 | Rate-limiting enzyme in the catabolic pathway of polyamine metabolism.       |
| Ckmt1                                   |  | Creatine kinase, mitochondrial 1                                                  | -1.69 | 3.27E-02 | -1.18 | 3.61E-01 | Transfer of phosphate to creatine in energy transduction.                    |
| <i>Nucleotide/Nucleoside Metabolism</i> |  |                                                                                   |       |          |       |          |                                                                              |
| TOP2A                                   |  | Topoisomerase (DNA) II alpha 170kDa                                               | -1.66 | 1.10E-02 | -1.06 | 7.38E-01 | Controls and alters the topologic states of DNA during transcription.        |
| <i>Metabolism Oxidation/Reduction</i>   |  |                                                                                   |       |          |       |          |                                                                              |
| PRDX4                                   |  | Peroxiredoxin 4                                                                   | -2.07 | 1.08E-02 | -1.03 | 8.30E-01 | Antioxidant enzyme.                                                          |
| XDH                                     |  | Xanthine dehydrogenase                                                            | -1.54 | 2.39E-02 | -1.05 | 7.34E-01 | Oxidative metabolism of purines.                                             |
| <i>Transport</i>                        |  |                                                                                   |       |          |       |          |                                                                              |
| MUP                                     |  | Major urinary protein pseudogene                                                  | -2.05 | 3.15E-02 | -1.06 | 8.53E-01 | Transport of small, hydrophobic molecules.                                   |
| TF                                      |  | Transferrin                                                                       | -1.88 | 4.64E-05 | 1.24  | 2.55E-01 | Binds to ferric iron.                                                        |
| SLC9A3R1                                |  | Solute carrier family 9 (sodium/hydrogen exchanger), member 3 regulator 1         | -1.64 | 2.02E-02 | -1.21 | 2.53E-01 | Sodium/hydrogen exchanger regulatory cofactor.                               |
| KCNMB1                                  |  | Potassium large conductance calcium-activated channel, subfamily M, beta member 1 | -1.59 | 3.78E-04 | 1.06  | 5.43E-01 | Large conductance, voltage and calcium-sensitive potassium channels.         |
| SLC39A14                                |  | Solute carrier family 39 (zinc transporter), member 14                            | -1.56 | 8.38E-03 | -1.08 | 6.30E-01 | Shows structural characteristics of zinc transporters.                       |

|                            |          |                                                           |       |          |       |          |                                                                                         |
|----------------------------|----------|-----------------------------------------------------------|-------|----------|-------|----------|-----------------------------------------------------------------------------------------|
|                            | SCNN1B   | Sodium channel, nonvoltage-gated 1, beta                  | -1.55 | 4.89E-03 | -1.12 | 4.59E-01 | Controls fluid and electrolyte transport across epithelia.                              |
|                            | SCNN1G   | Sodium channel, nonvoltage-gated 1, gamma                 | -1.55 | 9.87E-03 | -1.01 | 9.47E-01 | Controls fluid and electrolyte transport across epithelia.                              |
|                            | KCNK1    | Potassium channel, subfamily K, member 1                  | -1.53 | 1.99E-02 | -1.17 | 4.13E-01 | Member of the superfamily of potassium channel proteins.                                |
| <i>Immune Response</i>     |          |                                                           |       |          |       |          |                                                                                         |
|                            | APOB48R  | Apolipoprotein B48 receptor                               | -1.61 | 1.03E-02 | 1.00  | 9.96E-01 | Binds to the apolipoprotein B48 of dietary triglyceride (TG)-rich lipoproteins.         |
|                            | CCR5     | Chemokine (C-C motif) receptor 5                          | -1.57 | 3.06E-02 | 1.05  | 7.54E-01 | May play a role in granulocyte lineage proliferation and differentiation.               |
|                            | CCL7     | Chemokine (C-C motif) ligand 7                            | -1.53 | 3.67E-02 | -1.08 | 6.60E-01 | Attracts macrophages during inflammation and metastasis.                                |
|                            | CCR2     | Chemokine (C-C motif) receptor 2                          | -1.50 | 4.17E-03 | 1.11  | 4.35E-01 | Involved in monocyte infiltration in inflammatory diseases.                             |
|                            | LBP      | Lipopolysaccharide binding protein                        | -3.46 | 5.74E-03 | -1.15 | 7.69E-01 | Involved in the acute-phase immunologic response to gram-negative bacterial infections. |
| <i>Signal Transduction</i> |          |                                                           |       |          |       |          |                                                                                         |
|                            | RAB25    | RAB25, member RAS oncogene family                         | -2.40 | 3.82E-02 | -1.48 | 2.95E-01 | Small GTPase involved in membrane trafficking.                                          |
|                            | SFRP2    | Secreted frizzled-related protein 2                       | -2.27 | 6.07E-05 | -1.33 | 7.90E-02 | Soluble modulators of Wnt signaling.                                                    |
|                            | PIK3R3   | Phosphoinositide-3-kinase, regulatory subunit 3 (gamma)   | -1.85 | 3.36E-02 | -1.31 | 2.61E-01 | Regulatory subunit of phosphatidylinositol 3-kinase.                                    |
|                            | TNFRSF21 | Tumor necrosis factor receptor superfamily, member 21     | -1.76 | 1.48E-02 | -1.02 | 9.33E-01 | Activator of NF-kappaB and MAPK8/JNK, and inducer of cell apoptosis.                    |
|                            | SFRP4    | Secreted frizzled-related protein 4                       | -1.66 | 9.06E-03 | 1.08  | 7.39E-01 | Soluble modulators of Wnt signaling.                                                    |
|                            | DUSP18   | Dual specificity phosphatase 18                           | -1.55 | 1.24E-03 | -1.15 | 1.17E-01 | Modulator of signaling pathways.                                                        |
| <i>Others</i>              |          |                                                           |       |          |       |          |                                                                                         |
|                            | CEACAM4  | Carcinoembryonic antigen-related cell adhesion molecule 4 | -5.70 | 3.28E-02 | -1.72 | 3.46E-01 | Cell-cell adhesion molecule [RGD].                                                      |
|                            | EPCAM    | Epithelial cell adhesion molecule                         | -5.50 | 4.27E-02 | -1.76 | 3.69E-01 | Carcinoma-associated antigen.                                                           |
|                            | Expi     | Extracellular proteinase inhibitor                        | -4.59 | 6.86E-04 | -1.85 | 2.35E-01 | May mediate the invasive and metastatic potential of mammary adenocarcinomas.           |

|        |                                                            |       |          |       |          |                                                                                                        |
|--------|------------------------------------------------------------|-------|----------|-------|----------|--------------------------------------------------------------------------------------------------------|
| TSPAN1 | Tetraspanin 1                                              | -3.85 | 2.54E-02 | -1.05 | 9.19E-01 | Regulation of cell development, activation, growth and motility.                                       |
| CRABP1 | Cellular retinoic acid binding protein 1                   | -2.57 | 1.23E-03 | 1.35  | 1.34E-01 | Vitamin A-directed differentiation in epithelial tissue.                                               |
| CLDN7  | Claudin 7                                                  | -2.04 | 9.32E-03 | -1.03 | 9.18E-01 | Component of tight junction strands, maintains cell polarity and signal transduction.                  |
| GUSB   | Glucuronidase, beta                                        | -1.97 | 1.38E-02 | -1.38 | 1.18E-01 | Degrades glycosaminoglycans, including heparan sulfate, dermatan sulfate, and chondroitin-4,6-sulfate. |
| MMP12  | Matrix metalloproteinase 12 (macrophage elastase)          | -1.83 | 4.72E-02 | -1.01 | 9.89E-01 | Degrades soluble and insoluble elastin.                                                                |
| OCM2   | Oncomodulin 2                                              | -1.79 | 3.61E-03 | -1.65 | 7.28E-03 | Similar to the oncomodulin gene.                                                                       |
| UCP2   | Uncoupling protein 2 (mitochondrial, proton carrier)       | -1.77 | 4.81E-02 | -1.24 | 1.55E-01 | Separates oxidative phosphorylation from ATP synthesis with energy dissipated as heat.                 |
| STAP2  | Signal transducing adaptor family member 2                 | -1.76 | 2.66E-02 | -1.30 | 1.13E-01 | Mediates the interactions linking proteins involved in signal transduction pathways.                   |
| ACE    | Angiotensin I converting enzyme (peptidyl-dipeptidase A) 1 | -1.54 | 4.72E-04 | -1.01 | 9.20E-01 | Conversion of angiotensin I into angiotensin II.                                                       |

**Table S3c.**  
**Genes Upregulated in Liver by MR (Normalized to Control)**

| Gene Symbol                                   | Gene name                                                                                                       | MR   | p value  | MRC   | p value  | Function                                                                                                                       |
|-----------------------------------------------|-----------------------------------------------------------------------------------------------------------------|------|----------|-------|----------|--------------------------------------------------------------------------------------------------------------------------------|
| <i>Lipid Metabolism</i>                       |                                                                                                                 |      |          |       |          |                                                                                                                                |
| VLDLR                                         | Very low density lipoprotein receptor                                                                           | 5.79 | 2.00E-09 | 1.14  | 3.63E-01 | VLDL-triglyceride metabolism.                                                                                                  |
| ACSM3                                         | Acyl-CoA synthetase medium-chain family member 3                                                                | 3.29 | 5.63E-06 | 1.84  | 9.03E-04 | Unknown                                                                                                                        |
| ACSM2A                                        | Acyl-CoA synthetase medium-chain family member 2A                                                               | 2.14 | 3.70E-03 | 1.07  | 6.54E-01 | Unknown                                                                                                                        |
| CD36                                          | CD36 molecule (thrombospondin receptor)                                                                         | 1.78 | 6.12E-04 | 1.02  | 8.94E-01 | Binds long chain fatty acids. May function in the transport and/or as a regulator of fatty acid transport.                     |
| ME1                                           | Malic enzyme 1, NADP(+)-dependent, cytosolic                                                                    | 1.70 | 5.64E-03 | -2.44 | 4.45E-04 | Generates NADPH for fatty acid biosynthesis, links the glycolytic and citric acid cycles.                                      |
| PPARGC1A                                      | Peroxisome proliferator-activated receptor gamma, coactivator 1 alpha                                           | 1.67 | 1.64E-03 | -1.12 | 4.29E-01 | Regulates the genes involved in energy metabolism.                                                                             |
| ACOT2                                         | Acyl-CoA thioesterase 2                                                                                         | 1.66 | 1.49E-05 | -1.10 | 2.42E-01 | Hydrolyzes CoA esters.                                                                                                         |
| HADHB                                         | Hydroxyacyl-CoA dehydrogenase/3-ketoacyl-CoA thiolase/enoyl-CoA hydratase (trifunctional protein), beta subunit | 1.62 | 4.70E-04 | 1.03  | 7.36E-01 | Mitochondrial trifunctional protein, catalyzes the last three steps of mitochondrial beta-oxidation of long chain fatty acids. |
| AGPAT9                                        | 1-Acylglycerol-3-phosphate O-acyltransferase 9                                                                  | 1.59 | 1.41E-04 | 1.01  | 9.18E-01 | Converts glycerol-3-phosphate (G3P) to lysophosphatidic acid (LPA).                                                            |
| <i>Carbohydrate Metabolism</i>                |                                                                                                                 |      |          |       |          |                                                                                                                                |
| ACO2                                          | Aconitase 2, mitochondrial                                                                                      | 1.57 | 3.23E-07 | 1.06  | 1.71E-01 | Interconversion of citrate to isocitrate.                                                                                      |
| FUCA2                                         | Fucosidase, alpha-L- 2, plasma                                                                                  | 1.52 | 3.31E-04 | 1.24  | 1.35E-02 | Cytoplasm-specific alpha-L fucosidase.                                                                                         |
| PCK2                                          | Phosphoenolpyruvate carboxykinase 2 (mitochondrial)                                                             | 1.51 | 6.11E-06 | 1.05  | 4.04E-01 | Mitochondrial phosphoenolpyruvate carboxykinase. Catalyzes the conversion of oxaloacetate to phosphoenolpyruvate               |
| <i>Mitochondrial Electron Transport Chain</i> |                                                                                                                 |      |          |       |          |                                                                                                                                |
| NDUFAF4                                       | NADH dehydrogenase (ubiquinone) 1 alpha subcomplex, assembly factor 4                                           | 1.83 | 5.13E-04 | 1.24  | 2.05E-01 | Catalyzes the transfer of electrons from NADH to ubiquinone (coenzyme Q).                                                      |

Amino Acid Metabolism

|        |                                                                                                      |      |          |       |          |                                                                                                                                                                                                                                  |
|--------|------------------------------------------------------------------------------------------------------|------|----------|-------|----------|----------------------------------------------------------------------------------------------------------------------------------------------------------------------------------------------------------------------------------|
| MTHFD2 | Methylenetetrahydrofolate dehydrogenase (NADP+ dependent) 2, methenyltetrahydrofolate cyclohydrolase | 4.54 | 1.24E-06 | 2.08  | 1.10E-02 | Converts 5,10 methylene THF to 5,10 methenyl THF.                                                                                                                                                                                |
| ASNS   | Asparagine synthetase (glutamine-hydrolyzing)                                                        | 3.69 | 4.47E-07 | 1.32  | 1.54E-01 | Involved in the synthesis of asparagines.                                                                                                                                                                                        |
| PSAT1  | Phosphoserine aminotransferase 1                                                                     | 2.63 | 1.25E-05 | 1.42  | 1.05E-01 | Likely a phosphoserine aminotransferase                                                                                                                                                                                          |
| ODC1   | Ornithine decarboxylase 1                                                                            | 2.21 | 1.49E-06 | 1.52  | 1.03E-02 | Rate-limiting enzyme of the polyamine biosynthesis. Catalyzes ornithine to putrescine.                                                                                                                                           |
| PHGDH  | Phosphoglycerate dehydrogenase                                                                       | 1.76 | 1.17E-05 | -1.01 | 8.73E-01 | Catalyzes the transition of 3-phosphoglycerate into 3-phosphohydroxypyruvate, which is the first and rate-limiting step in the phosphorylated pathway of serine biosynthesis, using NAD+/NADH as a cofactor.                     |
| SCPEP1 | Serine carboxypeptidase 1                                                                            | 1.73 | 2.27E-03 | 1.51  | 1.44E-02 | May act as a serine carboxypeptidase.                                                                                                                                                                                            |
| GSR    | Glutathione reductase                                                                                | 1.70 | 4.44E-04 | 1.25  | 2.48E-02 | Catalyzes the conversion of glutathione and NADP+ to glutathione disulfide.                                                                                                                                                      |
| GSS    | Glutathione synthetase                                                                               | 1.69 | 3.72E-04 | 1.13  | 1.92E-01 | ATP-dependent conversion of gamma-L-glutamyl-L-cysteine to glutathione.                                                                                                                                                          |
| GLDC   | Glycine dehydrogenase (decarboxylating)                                                              | 1.63 | 3.07E-03 | 1.12  | 4.27E-01 | Degradation of glycine.                                                                                                                                                                                                          |
| TAT    | tyrosine aminotransferase                                                                            | 1.62 | 3.92E-02 | -1.07 | 7.17E-01 | conversion of L-tyrosine into p-hydroxyphenylpyruvate.                                                                                                                                                                           |
| SRM    | Spermidine synthase                                                                                  | 1.58 | 1.66E-03 | -1.01 | 9.31E-01 | Final step of spermidine biosynthesis. Conversion of putrescine to spermidine using decarboxylated S-adenosylmethionine as the cofactor.                                                                                         |
| GPX2   | Glutathione peroxidase 2 (gastrointestinal)                                                          | 1.56 | 5.77E-06 | 1.06  | 6.97E-01 | Member of the glutathione peroxidase family and encodes a selenium-dependent glutathione peroxidase that is one of two isoenzymes responsible for the majority of the glutathione-dependent hydrogen peroxide-reducing activity. |

Stress Response

|         |                                               |      |          |      |          |                                                                                                                                                                                                              |
|---------|-----------------------------------------------|------|----------|------|----------|--------------------------------------------------------------------------------------------------------------------------------------------------------------------------------------------------------------|
| GADD45G | Growth arrest and DNA-damage-inducible, gamma | 2.26 | 2.18E-02 | 1.53 | 3.04E-01 | Member of a group of genes whose transcript levels are increased following stressful growth arrest. Responds to environmental stresses by mediating activation of the p38/JNK pathway via MTK1/MEKK4 kinase. |
|---------|-----------------------------------------------|------|----------|------|----------|--------------------------------------------------------------------------------------------------------------------------------------------------------------------------------------------------------------|

|                                         |                                                                         |       |          |       |          |                                                                                                                                                                                                                                                                                                                                                                             |
|-----------------------------------------|-------------------------------------------------------------------------|-------|----------|-------|----------|-----------------------------------------------------------------------------------------------------------------------------------------------------------------------------------------------------------------------------------------------------------------------------------------------------------------------------------------------------------------------------|
| GADD45A                                 | Growth arrest and DNA-damage-inducible, alpha                           | 1.81  | 3.55E-04 | 1.17  | 3.07E-01 | Member of a group of genes whose transcript levels are increased following stressful growth arrest conditions and treatment with DNA-damaging agents. Responds to environmental stresses by mediating activation of the p38/JNK pathway via MTK1/MEKK4 kinase. DNA damage-induced transcription of this gene is mediated by both p53-dependent and -independent mechanisms. |
| ATF4                                    | Activating transcription factor 4 (tax-responsive enhancer element B67) | 1.67  | 1.04E-04 | 1.15  | 2.79E-01 | Characterized as the cAMP-response element binding protein 2 (CREB-2).                                                                                                                                                                                                                                                                                                      |
| <i>Nucleotide/Nucleoside Metabolism</i> |                                                                         |       |          |       |          |                                                                                                                                                                                                                                                                                                                                                                             |
| CTPS                                    | CTP synthase                                                            | 2.10  | 1.25E-05 | 1.56  | 7.83E-03 | Conversion of UTP to CTP, which is important in the biosynthesis of phospholipids and nucleic acids.                                                                                                                                                                                                                                                                        |
| IMPDH2                                  | IMP (inosine 5'-monophosphate) dehydrogenase 2                          | 1.73  | 2.75E-06 | 1.05  | 4.62E-01 | Rate-limiting enzyme in the de novo guanine nucleotide biosynthesis.                                                                                                                                                                                                                                                                                                        |
| Dut                                     | Deoxyuridine triphosphatase                                             | 1.67  | 3.50E-02 | 1.42  | 1.35E-01 | Precursor of thymidine nucleotides. May inhibit peroxisome proliferator-activated receptor (PPAR) activity.                                                                                                                                                                                                                                                                 |
| UMPS                                    | Uridine monophosphate synthetase                                        | 1.62  | 2.81E-07 | 1.28  | 1.81E-03 | Catalyzes the final two steps of the de novo pyrimidine biosynthetic pathway.                                                                                                                                                                                                                                                                                               |
| PPAT                                    | Phosphoribosyl pyrophosphate amidotransferase                           | 1.57  | 7.97E-04 | 1.36  | 1.63E-02 | Catalyzes the first step of de novo purine nucleotide biosynthesis.                                                                                                                                                                                                                                                                                                         |
| <i>Metabolism Oxidation/Reduction</i>   |                                                                         |       |          |       |          |                                                                                                                                                                                                                                                                                                                                                                             |
| GSTA3                                   | Gutathione S-transferase alpha 3                                        | 90.50 | 7.46E-13 | -1.33 | 1.43E-01 | Catalyzes the double bond isomerization of precursors for progesterone and testosterone during the biosynthesis of steroid hormones.                                                                                                                                                                                                                                        |
| AKR7A3                                  | Aldo-keto reductase family 7, member A3 (aflatoxin aldehyde reductase)  | 6.01  | 1.73E-05 | 2.00  | 7.88E-03 | Involved in the detoxification of aldehydes and ketones.                                                                                                                                                                                                                                                                                                                    |
| Aldh1a7                                 | Aldehyde dehydrogenase family 1, subfamily A7                           | 3.02  | 1.42E-04 | -1.01 | 8.53E-01 | Unknown                                                                                                                                                                                                                                                                                                                                                                     |
| ALDH1A1                                 | Aldehyde dehydrogenase 1 family, member A1                              | 2.52  | 4.06E-04 | 1.47  | 5.95E-02 | Second enzyme of the major oxidative pathway of alcohol metabolism. Has a high affinity for aldehydes.                                                                                                                                                                                                                                                                      |
| CYP17A1                                 | Cytochrome P450, family 17, subfamily A, polypeptide 1                  | 1.81  | 1.09E-03 | 1.53  | 9.68E-04 | Key enzyme in the steroidogenic pathway.                                                                                                                                                                                                                                                                                                                                    |

Transport

|         |                                                                                            |      |          |       |          |                                                                                                                                                           |
|---------|--------------------------------------------------------------------------------------------|------|----------|-------|----------|-----------------------------------------------------------------------------------------------------------------------------------------------------------|
| CYP4A11 | Cytochrome P450, family 4, subfamily A, polypeptide 11                                     | 1.73 | 2.81E-03 | -1.25 | 1.30E-01 | Hydroxylates medium-chain fatty acids such as laurate and myristate.                                                                                      |
| UGT2B4  | UDP glucuronosyltransferase 2 family, polypeptide B4                                       | 1.66 | 7.50E-04 | 1.65  | 4.05E-04 | Catalyzes the transfer of glucuronate from UDP-glucuronate to beta-D-glucuronoside. May play a role in drug metabolism.                                   |
| Sult2a6 | Sulfotransferase family 2A, dehydroepiandrosterone (DHEA)-preferring, member 2             | 1.61 | 6.57E-03 | 1.97  | 3.05E-04 | Expression reduced during the androgen-sensitive state of young adulthood and increased during the androgen-insensitive phases of puberty and senescence. |
| CYP2J2  | Cytochrome P450, family 2, subfamily J, polypeptide 2                                      | 1.54 | 4.09E-03 | 1.22  | 9.61E-02 | Predominant enzyme responsible for epoxidation of endogenous arachidonic acid.                                                                            |
| UGDH    | UDP-glucose 6-dehydrogenase                                                                | 1.53 | 6.92E-05 | 1.13  | 3.40E-02 | Converts UDP-glucose to UDP-glucuronate and thereby participates in the biosynthesis of glycosaminoglycans.                                               |
| EPHX2   | Epoxide hydrolase 2, cytoplasmic                                                           | 1.52 | 5.01E-03 | 1.01  | 9.02E-01 | Binds to specific epoxides and converts them to the corresponding dihydrodiols.                                                                           |
| SLC7A11 | Solute carrier family 7, (cationic amino acid transporter, y+ system) member 11            | 3.19 | 5.83E-06 | 1.05  | 6.27E-01 | Member of a heteromeric Na(+)-independent anionic amino acid transport system highly specific for cystine and glutamate.                                  |
| SLC3A2  | Solute carrier family 3 (activators of dibasic and neutral amino acid transport), member 2 | 2.98 | 1.98E-06 | 1.63  | 3.17E-03 | Associates with integrins and mediates integrin-dependent signaling related to normal cell growth and tumorigenesis.                                      |
| ADCY10  | Adenylate cyclase 10 (soluble)                                                             | 2.43 | 5.18E-07 | -1.07 | 3.07E-01 | G protein thought to function as a general bicarbonate sensor.                                                                                            |
| ABCB1   | ATP-binding cassette, sub-family B (MDR/TAP), member 1                                     | 1.89 | 2.60E-04 | 1.15  | 3.94E-01 | Member of the superfamily of ATP-binding cassette (ABC) transporters. A member of the MDR/TAP subfamily involved in multidrug resistance.                 |
| SLC7A5  | Solute carrier family 7 (cationic amino acid transporter, y+ system), member 5             | 1.73 | 1.11E-04 | 1.11  | 1.20E-01 | Integral membrane protein involved in liver development, carcinogenesis, and cell activation.                                                             |
| SLC26A8 | Solute carrier family 26, member 8                                                         | 1.66 | 3.09E-04 | 1.02  | 8.25E-01 | One member of a family of sulfate/anion transporter genes.                                                                                                |
| SLC38A2 | Solute carrier family 38, member 2                                                         | 1.61 | 5.63E-03 | 1.30  | 3.74E-02 | Alanine-preferring transporter.                                                                                                                           |

|                         |          |                                                                              |      |          |       |          |                                                                                                                                                                                                                                                                                             |
|-------------------------|----------|------------------------------------------------------------------------------|------|----------|-------|----------|---------------------------------------------------------------------------------------------------------------------------------------------------------------------------------------------------------------------------------------------------------------------------------------------|
|                         | SLC25A21 | Solute carrier family 25 (mitochondrial oxodicarboxylate carrier), member 21 | 1.56 | 1.32E-03 | -1.05 | 5.76E-01 | Mitochondrial carriers that transport C5-C7 oxodicarboxylates across inner mitochondrial membranes. One of the species transported by ODC is 2-oxoadipate, a common intermediate in the catabolism of lysine, tryptophan, and hydroxylysine in mammals, which is converted into acetyl-CoA. |
|                         | SLC4A4   | Solute carrier family 4, sodium bicarbonate cotransporter, member 4          | 1.56 | 3.05E-06 | -1.20 | 2.26E-01 | A sodium bicarbonate cotransporter.                                                                                                                                                                                                                                                         |
|                         | SLC20A1  | Solute carrier family 20 (phosphate transporter), member 1                   | 1.55 | 1.19E-03 | 1.29  | 9.95E-02 | Sodium-dependent phosphate symporter.                                                                                                                                                                                                                                                       |
|                         | SLC22A9  | Solute carrier family 22 (organic anion transporter), member 9               | 1.55 | 8.60E-03 | -1.19 | 3.38E-01 | May play a role in anion transport across a membrane.                                                                                                                                                                                                                                       |
|                         | AQP8     | aquaporin 8                                                                  | 1.55 | 1.55E-03 | 1.30  | 8.20E-03 | A water channel protein.                                                                                                                                                                                                                                                                    |
|                         | SLC22A5  | Solute carrier family 22 (organic cation/carnitine transporter), member 5    | 1.50 | 1.42E-02 | -1.08 | 5.31E-01 | Organic cation transporter and as a sodium-dependent high-affinity carnitine transporter.                                                                                                                                                                                                   |
| <i>Immune Response</i>  |          |                                                                              |      |          |       |          |                                                                                                                                                                                                                                                                                             |
|                         | CD14     | CD14 molecule                                                                | 1.92 | 8.70E-05 | -1.08 | 6.08E-01 | Preferentially expressed on monocytes/macrophages. Mediates the innate immune response to bacterial lipopolysaccharide.                                                                                                                                                                     |
| <i>Protein Turnover</i> |          |                                                                              |      |          |       |          |                                                                                                                                                                                                                                                                                             |
|                         | FARSB    | Phenylalanyl-tRNA synthetase, beta subunit                                   | 1.89 | 4.93E-05 | 1.38  | 3.23E-02 | Attaches L-phenylalanine to the terminal adenosine of the appropriate tRNA                                                                                                                                                                                                                  |
|                         | Rplp0    | Ribosomal protein, large, P0                                                 | 1.88 | 9.67E-04 | 1.12  | 4.50E-01 | Member of the ribosomal protein family. Has similarity to other P ribosomal proteins over the carboxyl terminal sequence.                                                                                                                                                                   |
|                         | THG1L    | tRNA-histidine guanylyltransferase 1-like (S. cerevisiae)                    | 1.86 | 1.35E-04 | 1.59  | 4.91E-03 | Unknown                                                                                                                                                                                                                                                                                     |
|                         | RRS1     | RRS1 ribosome biogenesis regulator homolog (S. cerevisiae)                   | 1.83 | 1.40E-04 | 1.19  | 8.27E-02 | Unknown                                                                                                                                                                                                                                                                                     |
|                         | RPL15    | Ribosomal protein L15                                                        | 1.79 | 2.78E-04 | 1.42  | 1.24E-02 | Encodes a ribosomal protein that is a component of the 60S subunit.                                                                                                                                                                                                                         |
|                         | Npm1     | Nucleophosmin (nucleolar phosphoprotein B23, numatrin)                       | 1.74 | 5.06E-06 | 1.16  | 1.50E-01 | RNA-associated nucleolar phosphoprotein. Involved in ribosome assembly.                                                                                                                                                                                                                     |

|        |                                                                    |      |          |      |          |                                                                                                             |
|--------|--------------------------------------------------------------------|------|----------|------|----------|-------------------------------------------------------------------------------------------------------------|
| LARS   | Leucyl-tRNA synthetase                                             | 1.72 | 4.66E-06 | 1.28 | 5.66E-03 | Catalyzes the ATP-dependent ligation of L-leucine to tRNA(Leu).                                             |
| RPL18A | Ribosomal protein L18a                                             | 1.69 | 4.94E-05 | 1.04 | 6.77E-01 | A ribosomal protein that is a component of the 60S subunit.                                                 |
| SARS   | Seryl-tRNA synthetase                                              | 1.64 | 2.93E-04 | 1.49 | 5.42E-03 | Catalyzes the transfer of L-serine to tRNA (Ser).                                                           |
| MRPL50 | Mitochondrial ribosomal protein L50                                | 1.64 | 6.18E-04 | 1.46 | 6.50E-03 | Encodes a putative 39S subunit protein and belongs to the L47P ribosomal protein family.                    |
| YARS   | Tyrosyl-tRNA synthetase                                            | 1.60 | 2.51E-05 | 1.20 | 5.07E-02 | Catalyzes the aminoacylation of tRNA by their cognate amino acid, tyrosyl-tRNA synthetase.                  |
| DTD1   | D-tyrosyl-tRNA deacylase 1 homolog (S. cerevisiae)                 | 1.59 | 8.64E-05 | 1.14 | 8.30E-02 | Hydrolyzes D-tyrosyl-tRNA(Tyr) into D-tyrosine and free tRNA(Tyr).                                          |
| RPS6   | Ribosomal protein S6                                               | 1.56 | 7.66E-03 | 1.06 | 7.48E-01 | Belongs to the S6E family of ribosomal proteins. Is the major substrate of protein kinases in the ribosome. |
| Mars   | Methionine-tRNA synthetase                                         | 1.56 | 1.06E-05 | 1.17 | 1.40E-02 | Catalyzes the aminoacylation of tRNA by their cognate amino acid, methionyl-tRNA synthetase.                |
| EIF2S1 | Eukaryotic translation initiation factor 2, subunit 1 alpha, 35kDa | 1.51 | 3.25E-05 | 1.24 | 1.15E-02 | Catalyzes the first regulated step of protein synthesis initiation.                                         |

### *Signal Transduction*

|          |                                                                                     |      |          |       |          |                                                                                                                                                                                                                         |
|----------|-------------------------------------------------------------------------------------|------|----------|-------|----------|-------------------------------------------------------------------------------------------------------------------------------------------------------------------------------------------------------------------------|
| FGF21    | Fibroblast growth factor 21                                                         | 8.50 | 1.97E-06 | 1.72  | 1.03E-01 | Member of the fibroblast growth factor (FGF) family.                                                                                                                                                                    |
| SERPINA7 | Serpin peptidase inhibitor, clade A (alpha-1 antiproteinase, antitrypsin), member 7 | 8.48 | 3.33E-07 | 1.49  | 1.58E-01 | Encodes the major thyroid hormone transport protein.                                                                                                                                                                    |
| IGFBP1   | Insulin-like growth factor binding protein 1                                        | 6.39 | 6.96E-07 | 1.02  | 8.79E-01 | Binds both insulin-like growth factors (IGFs) I and II, prolonging the half-life of the IGFs and alters their interaction with cell surface receptors.                                                                  |
| TRIB3    | Tribbles homolog 3 (Drosophila)                                                     | 3.23 | 3.70E-08 | -1.00 | 9.17E-01 | A putative protein kinase that is induced by the transcription factor NF-kappaB.                                                                                                                                        |
| PPP1R9A  | Protein phosphatase 1, regulatory (inhibitor) subunit 9A                            | 1.73 | 5.23E-07 | -1.08 | 2.38E-01 | Regulatory subunit of protein phosphatase I.                                                                                                                                                                            |
| RGS5     | Regulator of G-protein signaling 5                                                  | 1.65 | 9.99E-04 | 1.42  | 1.37E-02 | Regulator of G protein signaling (RGS) proteins.                                                                                                                                                                        |
| IGFBP2   | Insulin-like growth factor binding protein 2, 36kDa                                 | 1.56 | 9.65E-06 | -1.10 | 1.32E-01 | Binds to Igf-I and Igf-II.                                                                                                                                                                                              |
| PRKCDBP  | Protein kinase C, delta binding protein                                             | 1.55 | 1.12E-04 | 1.02  | 8.11E-01 | A binding protein of the protein kinase C, delta (PRKCD). Strongly induced by serum starvation. Protein down-regulated in various cancer cell lines, suggesting the possible tumor suppressor function of this protein. |

|                                        |          |                                                           |      |          |       |          |                                                                                                                                                                                                      |
|----------------------------------------|----------|-----------------------------------------------------------|------|----------|-------|----------|------------------------------------------------------------------------------------------------------------------------------------------------------------------------------------------------------|
|                                        | PPP1R14B | Protein phosphatase 1, regulatory (inhibitor) subunit 14B | 1.55 | 3.02E-02 | 1.38  | 8.61E-02 | Inhibitor for protein type-1 phosphatase (PP1) and myosin light-chain phosphatase (MLCP). Substrate of protein kinase C (PKC).                                                                       |
| <i>Cell Proliferation or Apoptosis</i> |          |                                                           |      |          |       |          |                                                                                                                                                                                                      |
|                                        | MYC      | V-myc myelocytomatosis viral oncogene homolog (avian)     | 1.81 | 7.33E-04 | 1.19  | 1.63E-01 | A multifunctional, nuclear phosphoprotein that plays a role in cell cycle progression, apoptosis and cellular transformation.                                                                        |
|                                        | FASTKD2  | FAST kinase domains 2                                     | 1.65 | 2.63E-05 | 1.25  | 2.29E-02 | May play a role in mitochondrial apoptosis.                                                                                                                                                          |
|                                        | TNFSF10  | Tumor necrosis factor (ligand) superfamily, member 10     | 1.61 | 3.94E-02 | 1.53  | 1.00E-01 | Induces apoptosis in transformed and tumor cells, but does not appear to kill normal cells. Binding of this protein to its receptors triggers the activation of MAPK8/JNK, caspase 8, and caspase 3. |
|                                        | Gas5     | Growth arrest specific 5                                  | 1.56 | 1.75E-04 | 1.11  | 1.76E-01 | Transcript expressed during growth arrest phase of the cell cycle. May encode a small nucleolar RNA.                                                                                                 |
|                                        | CDKL3    | Cyclin-dependent kinase-like 3                            | 1.54 | 3.65E-04 | 1.06  | 5.71E-01 | A member of the cyclin-dependent protein kinase (CDK) family. Important regulator of cell cycle progression.                                                                                         |
|                                        | EGR1     | Early growth response 1                                   | 1.51 | 4.96E-04 | 1.21  | 2.54E-01 | Nuclear protein. Functions as a transcriptional regulator. May be a cancer suppressor gene.                                                                                                          |
| <i>Others</i>                          |          |                                                           |      |          |       |          |                                                                                                                                                                                                      |
|                                        | CRYL1    | Crystallin, lambda 1                                      | 2.24 | 1.25E-03 | 1.58  | 1.84E-02 | Catalyzes the dehydrogenation of L-gulonate into dehydro-L-gulonate in the uronate cycle.                                                                                                            |
|                                        | DDAH1    | Dimethylarginine dimethylaminohydrolase 1                 | 2.22 | 4.56E-06 | 1.33  | 3.95E-02 | Plays a role in nitric oxide generation by regulating cellular concentrations of methylarginines, which in turn inhibit nitric oxide synthase activity.                                              |
|                                        | CASP4    | Caspase 4, apoptosis-related cysteine peptidase           | 1.97 | 3.50E-06 | 1.20  | 1.62E-01 | Member of the cysteine-aspartic acid protease (caspase) family. Plays a central role in the execution-phase of cell apoptosis.                                                                       |
|                                        | LGALS2   | Lectin, galactoside-binding, soluble, 2                   | 1.97 | 1.93E-05 | 1.24  | 2.60E-01 | Can bind to lymphotoxin-alpha.                                                                                                                                                                       |
|                                        | MYBBP1A  | MYB binding protein (P160) 1a                             | 1.77 | 1.17E-06 | 1.22  | 1.39E-01 | Transcriptional activator that displays a circadian rhythm of expression in hepatocytes.                                                                                                             |
|                                        | CA2      | Carbonic anhydrase II                                     | 1.70 | 5.56E-03 | 1.68  | 2.78E-02 | Catalyzes reversible hydration of carbon dioxide.                                                                                                                                                    |
|                                        | HSPA9    | Heat shock 70kDa protein 9 (mortalin)                     | 1.59 | 2.91E-06 | -1.00 | 9.21E-01 | Plays a role in cell proliferation, stress response and maintenance of the mitochondria.                                                                                                             |

|        |                                   |      |          |      |          |                                                                                                      |
|--------|-----------------------------------|------|----------|------|----------|------------------------------------------------------------------------------------------------------|
| LRPPRC | Leucine-rich PPR-motif containing | 1.57 | 8.29E-06 | 1.09 | 4.25E-02 | Plays a role in regulating the interaction of the cytoskeleton with a variety of cellular processes. |
| EPCAM  | Epithelial cell adhesion molecule | 1.50 | 5.10E-03 | 1.06 | 5.67E-01 | Homotypic calcium-independent cell adhesion molecule.                                                |

**Table S3d.**  
**Genes Downregulated in Liver by MR (Normalized to Control)**

| Gene Symbol                    | Gene name                                                   | MR     | p value  | MRC   | p value  | Function                                                                                                                                                                                            |
|--------------------------------|-------------------------------------------------------------|--------|----------|-------|----------|-----------------------------------------------------------------------------------------------------------------------------------------------------------------------------------------------------|
| <i>Lipid Metabolism</i>        |                                                             |        |          |       |          |                                                                                                                                                                                                     |
| SCD                            | Stearoyl-CoA desaturase (delta-9-desaturase)                | -13.78 | 4.78E-06 | -1.43 | 1.11E-02 | Rate-limiting step in the synthesis of unsaturated fatty acids.                                                                                                                                     |
| PNPLA3                         | Patatin-like phospholipase domain containing 3              | -5.13  | 5.77E-04 | -4.31 | 1.27E-03 | triacylglycerol hydrolysis.                                                                                                                                                                         |
| THRSP                          | Thyroid hormone responsive                                  | -2.31  | 4.08E-04 | -1.29 | 1.33E-01 | Controls lipid metabolism                                                                                                                                                                           |
| ACACB                          | Acetyl-CoA carboxylase beta                                 | -2.19  | 1.99E-07 | -1.82 | 5.46E-06 | Carboxylation of acetyl-CoA to malonyl-CoA, the rate-limiting step in fatty acid synthesis and inhibition of carnitine-palmitoyl-CoA transferase I                                                  |
| ACLY                           | ATP citrate lyase                                           | -2.07  | 1.04E-03 | -1.65 | 1.52E-02 | Formation of acetyl-CoA and oxaloacetate from citrate and CoA.                                                                                                                                      |
| CROT                           | Carnitine O-octanoyltransferase                             | -1.93  | 2.76E-03 | -2.57 | 4.60E-04 | Converts 4,8-dimethylnonanoyl-CoA to its corresponding carnitine ester. Necessary for transport of medium- and long-chain acyl-CoA molecules out of the peroxisome to the cytosol and mitochondria. |
| INSIG1                         | Insulin induced gene 1                                      | -1.93  | 1.03E-02 | -1.83 | 1.33E-03 | Regulates cholesterol concentrations in cells                                                                                                                                                       |
| LIPC                           | lipase, hepatic                                             | -1.85  | 1.69E-07 | -1.08 | 4.20E-02 | triglyceride hydrolase and ligand/bridging factor for receptor-mediated lipoprotein uptake.                                                                                                         |
| ELOVL5                         | ELOVL family member 5, elongation of long chain fatty acids | -1.55  | 2.98E-05 | -1.17 | 6.78E-03 | Elongation of long-chain polyunsaturated fatty acids.                                                                                                                                               |
| <i>Carbohydrate Metabolism</i> |                                                             |        |          |       |          |                                                                                                                                                                                                     |
| GCK                            | Glucokinase (hexokinase 4)                                  | -1.81  | 8.91E-04 | -1.23 | 2.36E-01 | Phosphorylates glucose to produce glucose-6-phosphate, the first step in most glucose metabolism pathways.                                                                                          |
| PKLR                           | Pyruvate kinase, liver and RBC                              | -1.62  | 1.89E-03 | 1.02  | 8.49E-01 | Transphosphorylation of phohsphoenolpyruvate into pyruvate and ATP, which is the rate-limiting step of glycolysis.                                                                                  |

*Amino Acid Metabolism*

|      |                             |       |          |       |          |                                                                                                                   |
|------|-----------------------------|-------|----------|-------|----------|-------------------------------------------------------------------------------------------------------------------|
| OAT  | Ornithine aminotransferase  | -3.68 | 1.65E-05 | -1.59 | 1.32E-02 | Converts arginine and ornithine into glutamate and GABA.                                                          |
| MCEE | Methylmalonyl CoA epimerase | -1.53 | 7.02E-06 | 1.21  | 7.16E-04 | Catalyzes the interconversion of D- and L-methylmalonyl-CoA during the degradation of branched chain amino acids. |

*Protein Turnover*

|       |                                                                                           |       |          |      |          |                                                                                                                                             |
|-------|-------------------------------------------------------------------------------------------|-------|----------|------|----------|---------------------------------------------------------------------------------------------------------------------------------------------|
| PSMB8 | Proteasome (prosome, macropain) subunit, beta type, 8 (large multifunctional peptidase 7) | -1.70 | 1.41E-05 | 1.23 | 1.11E-02 | Member of the proteasome B-type family, 20S core beta subunit located in the class II region of the MHC (major histocompatibility complex). |
| ISG15 | ISG15 ubiquitin-like modifier                                                             | -1.70 | 2.57E-02 | 1.71 | 3.65E-02 | Ubiquitin-like protein that becomes conjugated to many cellular proteins upon activation by interferon-alpha and -beta.                     |

*Nucleotide/Nucleoside Metabolism*

|       |                                                    |       |          |       |          |                                          |
|-------|----------------------------------------------------|-------|----------|-------|----------|------------------------------------------|
| ENPP3 | Ectonucleotide pyrophosphatase/phosphodiesterase 3 | -1.95 | 1.22E-04 | -1.08 | 3.88E-01 | Hydrolysis of extracellular nucleotides. |
|-------|----------------------------------------------------|-------|----------|-------|----------|------------------------------------------|

*Metabolism Oxidation/Reduction*

|         |                                                                                         |       |          |       |          |                                                                                                                                                                             |
|---------|-----------------------------------------------------------------------------------------|-------|----------|-------|----------|-----------------------------------------------------------------------------------------------------------------------------------------------------------------------------|
| CYP3A4  | Cytochrome P450, family 3, subfamily A, polypeptide 4                                   | -4.05 | 9.78E-05 | -1.09 | 2.82E-01 | Involved in the metabolism of drugs.                                                                                                                                        |
| NOX4    | NADPH oxidase 4                                                                         | -2.84 | 1.95E-03 | 1.67  | 3.18E-03 | Catalyzes the reduction of molecular oxygen to various reactive oxygen species (ROS).                                                                                       |
| CYP4A22 | Cytochrome P450, family 4, subfamily A, polypeptide 22                                  | -2.07 | 8.44E-06 | 1.15  | 3.57E-01 | Drug metabolism and synthesis of cholesterol, steroids and other lipids.                                                                                                    |
| CYP2C9  | Cytochrome P450, family 2, subfamily C, polypeptide 9                                   | -1.86 | 4.30E-04 | 1.02  | 6.25E-01 | Drug metabolism and synthesis of cholesterol, steroids and other lipids.                                                                                                    |
| ADH1C   | Alcohol dehydrogenase 1C (class I), gamma polypeptide                                   | -1.70 | 1.57E-03 | 1.09  | 2.09E-01 | Metabolizes alcohols, hydroxysteroids, and lipid peroxidation products.                                                                                                     |
| GSTM2   | Glutathione S-transferase mu 2 (muscle)                                                 | -1.69 | 8.36E-05 | 1.07  | 4.39E-01 | Detoxification of electrophilic compounds including carcinogens, therapeutic drugs, environmental toxins and products of oxidative stress, by conjugation with glutathione. |
| AKR1C3  | Aldo-keto reductase family 1, member C3 (3-alpha hydroxysteroid dehydrogenase, type II) | -1.58 | 5.85E-04 | -1.10 | 2.79E-01 | Conversion of aldehydes and ketones to their corresponding alcohols.                                                                                                        |

Transport

|          |                                                                                           |       |          |       |          |                                                                                                               |
|----------|-------------------------------------------------------------------------------------------|-------|----------|-------|----------|---------------------------------------------------------------------------------------------------------------|
| SLC6A6   | Solute carrier family 6 (neurotransmitter transporter, taurine), member 6                 | -3.79 | 7.64E-08 | -1.06 | 8.43E-01 | Sodium and chloride dependent taurine transporter.                                                            |
| SLC34A2  | Solute carrier family 34 (sodium phosphate), member 2                                     | -2.83 | 5.83E-05 | 1.63  | 7.37E-02 | pH-sensitive sodium-dependent phosphate transporter.                                                          |
| MUP      | Major urinary protein pseudogene                                                          | -2.16 | 4.83E-02 | 1.03  | 8.54E-01 | Transport of small, hydrophobic molecules.                                                                    |
| SLC39A4  | Solute carrier family 39 (zinc transporter), member 4                                     | -1.82 | 3.33E-05 | -1.09 | 4.31E-01 | Zinc uptake.                                                                                                  |
| SLC22A8  | Solute carrier family 22 (organic anion transporter), member 8                            | -1.79 | 1.27E-04 | 1.10  | 2.80E-01 | Sodium-independent transport and excretion of organic anions.                                                 |
| KCNN2    | Potassium intermediate/small conductance calcium-activated channel, subfamily N, member 2 | -1.73 | 1.51E-06 | -1.04 | 4.92E-01 | Forms a voltage-independent calcium-activated channel with three other calmodulin-binding subunits.           |
| SLC29A1  | Solute carrier family 29 (nucleoside transporters), member 1                              | -1.72 | 1.82E-06 | -1.05 | 2.59E-01 | Mitochondrial membrane glycoprotein. Mediates the cellular uptake of nucleosides from the surrounding medium. |
| TMEM37   | Transmembrane protein 37                                                                  | -1.65 | 4.89E-04 | 1.18  | 1.12E-01 | Auxiliary subunit of calcium channels that control the entry of extracellular calcium into the cytoplasm.     |
| Mk1      | Mk1 protein                                                                               | -1.63 | 1.55E-03 | -1.01 | 9.28E-01 | Potassium channel.                                                                                            |
| P2RX7    | Purinergic receptor P2X, ligand-gated ion channel, 7                                      | -1.63 | 2.25E-05 | 1.42  | 3.10E-02 | Ligand-gated ion channel and is responsible for ATP-dependent lysis of macrophages.                           |
| SLC9A7   | Solute carrier family 9 (sodium/hydrogen exchanger), member 7                             | -1.63 | 3.68E-04 | -1.13 | 3.52E-01 | Influx of sodium or potassium in exchange for hydrogen.                                                       |
| SLC16A10 | Solute carrier family 16, member 10 (aromatic amino acid transporter)                     | -1.60 | 8.16E-04 | -1.43 | 2.39E-02 | Na(+)-independent transport of aromatic amino acids across the plasma membrane.                               |

Immune Response

|        |                                             |       |          |      |          |                                                                                                         |
|--------|---------------------------------------------|-------|----------|------|----------|---------------------------------------------------------------------------------------------------------|
| UBD    | Ubiquitin D                                 | -2.73 | 3.00E-03 | 1.68 | 1.64E-01 | Diubiquitin protein that may function in antigen processing and presentation.                           |
| SCRN1  | Uecernin 1                                  | -2.58 | 4.46E-05 | 1.00 | 9.93E-01 | Regulation of exocytosis in mast cells.                                                                 |
| OAS1   | 2',5'-Oligoadenylate synthetase 1, 40/46kDa | -1.97 | 5.86E-03 | 1.36 | 6.91E-02 | Innate immune response to viral infection.                                                              |
| CXCL12 | Chemokine (C-X-C motif) ligand 12           | -1.95 | 2.71E-05 | 1.28 | 6.67E-03 | Activates lymphocytes and have been implicated in the metastasis of some cancers such as breast cancer. |
| CXCL9  | Chemokine (C-X-C motif) ligand 9            | -1.92 | 3.65E-04 | 1.50 | 6.23E-02 | Thought to be involved in T cell trafficking. Member of the chemokine family of cytokines.              |

Signal Transduction

|         |                                                                 |       |          |       |          |                                                                                                                                                             |
|---------|-----------------------------------------------------------------|-------|----------|-------|----------|-------------------------------------------------------------------------------------------------------------------------------------------------------------|
| TSC22D1 | TSC22 domain family, member 1                                   | -2.96 | 3.56E-05 | 1.27  | 1.73E-01 | Transcription factor and belongs to the large family of early response genes.                                                                               |
| RGS16   | Regulator of G-protein signaling 16                             | -2.51 | 8.45E-03 | -2.05 | 3.66E-02 | Inhibits signal transduction by increasing the GTPase activity of G protein alpha subunits.                                                                 |
| IGFALS  | Insulin-like growth factor binding protein, acid labile subunit | -2.18 | 2.40E-03 | 1.42  | 4.36E-02 | Increase IGFs' half-life and their vascular localization.                                                                                                   |
| MME     | Membrane metallo-endopeptidase                                  | -2.11 | 8.01E-06 | -1.89 | 3.46E-05 | Inactivates several peptide hormones including glucagon, enkephalins, substance P, neurotensin, oxytocin, and bradykinin.                                   |
| PPP1R3B | Protein phosphatase 1, regulatory (inhibitor) subunit 3B        | -2.03 | 8.35E-03 | 1.11  | 6.11E-01 | Suppresses the rate at which PP1 dephosphorylates (i.e., inactivates) glycogen phosphorylase and enhances the rate at which it activates glycogen synthase. |
| PIK3R1  | Phosphoinositide-3-kinase, regulatory subunit 1 (alpha)         | -1.71 | 2.74E-03 | 1.03  | 7.91E-01 | Phosphorylates the inositol ring of phosphatidylinositol. Plays an important role in the metabolic actions of insulin.                                      |
| FGF1    | Fibroblast growth factor 1 (acidic)                             | -1.66 | 7.63E-04 | 1.28  | 2.02E-01 | Thought to be involved in organogenesis.                                                                                                                    |
| AVPR1A  | arginine vasopressin receptor 1A                                | -1.65 | 6.65E-04 | -1.08 | 5.56E-01 | Receptor for arginine vasopressin, stimulates a phosphatidylinositol-calcium second messenger system.                                                       |
| IL1RN   | Interleukin 1 receptor antagonist                               | -1.61 | 1.33E-02 | 1.28  | 1.79E-01 | Inhibits the activities of interleukin 1, alpha (IL1A) and interleukin 1, beta (IL1B).                                                                      |

Others

|         |                                               |        |          |       |          |                                                                                       |
|---------|-----------------------------------------------|--------|----------|-------|----------|---------------------------------------------------------------------------------------|
| Dhrs7   | Dehydrogenase/reductase (SDR family) member 7 | -18.78 | 1.88E-07 | 1.27  | 6.86E-02 | Unknown                                                                               |
| PLA2G16 | Phospholipase A2, group XVI                   | -2.27  | 2.29E-06 | -1.16 | 7.94E-02 | Gene whose expression is suppressed by HRAS                                           |
| HYAL1   | Hyaluronoglucosaminidase 1                    | -1.92  | 4.59E-05 | -1.02 | 8.45E-01 | Degrades hyaluronan                                                                   |
| HYAL3   | Hyaluronoglucosaminidase 3                    | -1.81  | 3.42E-04 | -1.19 | 1.27E-01 | Unknown                                                                               |
| LYST    | Lysosomal trafficking regulator               | -1.78  | 1.22E-06 | 1.06  | 4.65E-01 | Regulates intracellular protein trafficking to and from the lysosome.                 |
| F11R    | F11 receptor                                  | -1.64  | 1.69E-03 | -1.25 | 1.29E-02 | Regulator of tight junction assembly in epithelia.                                    |
| PGCP    | Plasma glutamate carboxypeptidase             | -1.61  | 1.29E-05 | 1.04  | 7.07E-01 | Plays a role in liver regeneration.                                                   |
| CA8     | carbonic anhydrase VIII                       | -1.54  | 1.25E-05 | 1.33  | 8.42E-04 | Lacks carbonic anhydrase activity (i.e., the reversible hydration of carbon dioxide). |

|      |                                      |       |          |      |          |                                                             |
|------|--------------------------------------|-------|----------|------|----------|-------------------------------------------------------------|
| CA5B | Carbonic anhydrase VB, mitochondrial | -1.53 | 3.49E-04 | 1.62 | 1.22E-05 | reversible hydration of carbon dioxide in the mitochondria. |
|------|--------------------------------------|-------|----------|------|----------|-------------------------------------------------------------|

**Table S3e.**  
**Genes Upregulated in Muscle by MR (Normalized to Control)**

| Gene Symbol                    | Gene name                                                   | MR   | p value  | MRC  | p value  | Function                                                                                                                             |
|--------------------------------|-------------------------------------------------------------|------|----------|------|----------|--------------------------------------------------------------------------------------------------------------------------------------|
| <i>Lipid Metabolism</i>        |                                                             |      |          |      |          |                                                                                                                                      |
| ELOVL6                         | ELOVL family member 6, elongation of long chain fatty acids | 2.04 | 4.97E-02 | 1.07 | 5.56E-01 | UseS malonyl-CoA as a 2-carbon donor in the first and rate-limiting step of fatty acid elongation.                                   |
| LPL                            | Lipoprotein lipase                                          | 1.75 | 1.78E-02 | 1.23 | 6.27E-02 | Functions as a triglyceride hydrolase and ligand/bridging factor for receptor-mediated lipoprotein uptake.                           |
| CD36                           | CD36 molecule (thrombospondin receptor)                     | 1.71 | 2.87E-02 | 1.23 | 2.63E-01 | Binds long chain fatty acids and may function in the transport and/or as a regulator of fatty acid transport.                        |
| LIPE                           | Lipase, hormone-sensitive                                   | 1.68 | 5.99E-03 | 1.10 | 2.41E-01 | Converts cholesteryl esters to free cholesterol for steroid hormone production, hydrolyzes stored triglycerides to free fatty acids. |
| ACAA2                          | Acetyl-CoA acyltransferase 2                                | 1.55 | 1.02E-02 | 1.28 | 5.79E-02 | Last step of the mitochondrial fatty acid beta-oxidation spiral.                                                                     |
| GPAM                           | Glycerol-3-phosphate acyltransferase, mitochondrial         | 1.54 | 2.00E-02 | 1.15 | 1.81E-01 | Initial and committing step in glycerolipid biosynthesis.                                                                            |
| ACSF2                          | Acyl-CoA synthetase family member 2                         | 1.52 | 4.42E-03 | 1.06 | 1.94E-01 | Unknown                                                                                                                              |
| <i>Carbohydrate Metabolism</i> |                                                             |      |          |      |          |                                                                                                                                      |
| LDHB                           | Lactate dehydrogenase B                                     | 2.58 | 3.36E-02 | 1.88 | 6.12E-02 | Reversible conversion of lactate and pyruvate.                                                                                       |
| NDUFV3                         | NADH dehydrogenase (ubiquinone) flavoprotein 3              | 1.97 | 6.06E-03 | 1.37 | 2.59E-02 | Rotenone-sensitive oxidation of NADH and the reduction of ubiquinone.                                                                |
| PDK4                           | Pyruvate dehydrogenase kinase, isozyme 4                    | 1.84 | 1.42E-02 | 1.25 | 3.07E-01 | Mitochondrial protein that inhibits the pyruvate dehydrogenase complex.                                                              |
| <i>Myofibrillar Proteins</i>   |                                                             |      |          |      |          |                                                                                                                                      |
| TNNC1                          | Troponin C type 1 (slow)                                    | 5.32 | 2.90E-02 | 2.78 | 1.07E-01 | Slow-twitch muscle inhibitory troponin subunit, blocks actin-myosin interactions and thereby mediating striated muscle relaxation.   |

|                                |         |                                                              |      |          |       |          |                                                                                                                                                                                                                               |
|--------------------------------|---------|--------------------------------------------------------------|------|----------|-------|----------|-------------------------------------------------------------------------------------------------------------------------------------------------------------------------------------------------------------------------------|
|                                | TNNI1   | Troponin I type 1 (skeletal, slow)                           | 5.22 | 1.19E-02 | 2.37  | 2.76E-02 | Associates with tropomyosin. Regulates the calcium sensitivity of the myofibril contractile apparatus of striated muscles. Troponin I (TnI) blocks actin-myosin interactions and thereby mediates striated muscle relaxation. |
|                                | MYH10   | Myosin, heavy chain 10, non-muscle                           | 1.92 | 3.94E-02 | 1.32  | 1.17E-01 | Produces motor activity with actin filaments.                                                                                                                                                                                 |
| <i>Calcium-Binding Protein</i> |         |                                                              |      |          |       |          |                                                                                                                                                                                                                               |
|                                | S100A9  | S100 calcium binding protein A9                              | 2.24 | 1.97E-02 | 1.12  | 5.20E-01 | Regulation of cellular processes such as cell cycle progression and differentiation.                                                                                                                                          |
|                                | S100A8  | S100 calcium binding protein A8                              | 2.03 | 7.08E-03 | 1.10  | 4.84E-01 | Regulation of cellular processes such as cell cycle progression and differentiation.                                                                                                                                          |
| <i>Muscle Development</i>      |         |                                                              |      |          |       |          |                                                                                                                                                                                                                               |
|                                | MYOZ2   | Myozenin 2                                                   | 3.84 | 2.07E-02 | 1.98  | 9.39E-02 | Unknown                                                                                                                                                                                                                       |
|                                | CSRP3   | Cysteine and glycine-rich protein 3 (cardiac LIM protein)    | 3.21 | 1.65E-02 | 2.54  | 1.45E-02 | Involved in regulatory processes important for development and cellular differentiation.                                                                                                                                      |
|                                | MYOM3   | Myomesin family, member 3                                    | 2.18 | 1.78E-02 | 1.19  | 7.90E-02 | Unknown                                                                                                                                                                                                                       |
| <i>Transport</i>               |         |                                                              |      |          |       |          |                                                                                                                                                                                                                               |
|                                | ATP2A2  | ATPase, Ca++ transporting, cardiac muscle, slow twitch 2     | 3.42 | 1.71E-02 | 1.53  | 1.12E-01 | Calcium transport.                                                                                                                                                                                                            |
|                                | AQP7    | Aquaporin 7                                                  | 3.23 | 3.43E-03 | 1.31  | 6.68E-02 | Facilitates water, glycerol and urea transport.                                                                                                                                                                               |
|                                | KCNJ2   | Potassium inwardly-rectifying channel, subfamily J, member 2 | 1.60 | 4.34E-03 | -1.03 | 8.64E-01 | Inward-rectifier type potassium channel. Probably participates in establishing action potential waveform and excitability of muscle tissues.                                                                                  |
| <i>Protein Turnover</i>        |         |                                                              |      |          |       |          |                                                                                                                                                                                                                               |
|                                | UBE2I   | Ubiquitin-conjugating enzyme E2I (UBC9 homolog, yeast)       | 1.69 | 1.84E-02 | 1.53  | 4.72E-02 | Member of the E2 ubiquitin-conjugating enzyme family.                                                                                                                                                                         |
| <i>Extracellular Matrix</i>    |         |                                                              |      |          |       |          |                                                                                                                                                                                                                               |
|                                | LEPREL1 | Leprecan-like 1                                              | 1.62 | 2.53E-02 | 1.21  | 9.83E-02 | Belongs to a family of collagen prolyl hydroxylases required for proper collagen biosynthesis, folding, and assembly.                                                                                                         |

Other

|         |                                      |      |          |      |          |                                                                                                                                                              |
|---------|--------------------------------------|------|----------|------|----------|--------------------------------------------------------------------------------------------------------------------------------------------------------------|
| PADI2   | Peptidyl arginine deiminase, type II | 1.58 | 6.66E-03 | 1.43 | 7.99E-02 | Post-translational deimination of proteins by converting arginine residues into citrullines in the presence of calcium ions.                                 |
| ANGPTL4 | Angiopoietin-like 4                  | 1.50 | 4.18E-02 | 1.09 | 6.58E-01 | Target of peroxisome proliferation activators. Serum hormone directly involved in regulating glucose homeostasis, lipid metabolism, and insulin sensitivity. |

**Table S3f.**  
**Genes Downregulated in Muscle by MR (Normalized to Control)**

| Gene Symbol                  | Gene name |                                                                          | MR    | p value  | MRC   | p value  | Function                                                                                    |
|------------------------------|-----------|--------------------------------------------------------------------------|-------|----------|-------|----------|---------------------------------------------------------------------------------------------|
| <i>Lipid Metabolism</i>      | FABP1     | Fatty acid binding protein 1, liver                                      | -2.87 | 3.11E-03 | -1.65 | 1.01E-01 | Binds long-chain fatty acids and other hydrophobic ligands.                                 |
|                              | APOH      | Apolipoprotein H (beta-2-glycoprotein I)                                 | -1.74 | 1.23E-02 | -1.29 | 2.24E-01 | Lipoprotein metabolism, coagulation, and the production of antiphospholipid autoantibodies. |
|                              | ACSL3     | Acyl-CoA synthetase long-chain family member 3                           | -1.71 | 7.25E-03 | -1.21 | 1.34E-01 | Converts free long-chain fatty acids into fatty acyl-CoA esters.                            |
| <i>Protein Metabolism</i>    | RPS2      | Ribosomal protein S2                                                     | -1.63 | 4.37E-03 | -1.45 | 7.66E-02 | Ribosomal protein that is a component of the 40S subunit.                                   |
|                              | MYBPH     | Myosin binding protein H                                                 | -1.97 | 1.17E-02 | -1.52 | 6.31E-02 | Myosin binding protein.                                                                     |
| <i>Myofibrillar Proteins</i> | TPX2      | TPX2, microtubule-associated, homolog (Xenopus laevis)                   | -1.53 | 7.16E-03 | -1.11 | 3.12E-01 | Unknown                                                                                     |
|                              |           |                                                                          |       |          |       |          |                                                                                             |
| <i>Immune Response</i>       | IRGM      | Immunity-related GTPase family, M                                        | -1.99 | 1.86E-04 | 1.08  | 5.92E-01 | Plays a role in autophagy and control of intracellular mycobacteria.                        |
|                              | AMBP      | Alpha-1-microglobulin/bikunin precursor                                  | -1.87 | 4.54E-02 | -1.31 | 3.95E-01 | Regulation of inflammatory processes.                                                       |
| <i>Transport</i>             | MUP       | Major urinary protein pseudogene                                         | -2.23 | 3.06E-02 | -1.32 | 4.74E-01 | Transport of small, hydrophobic molecules.                                                  |
|                              | TF        | Transferrin                                                              | -1.87 | 1.18E-02 | -1.54 | 7.73E-02 | Iron transport.                                                                             |
|                              | KCNAB1    | Potassium voltage-gated channel, shaker-related subfamily, beta member 1 | -1.53 | 1.04E-03 | -1.30 | 1.21E-02 | Voltage-gated, shaker-related subfamily, potassium channel.                                 |

Signal Transduction

|        |                                                              |       |          |       |          |                                                                                                                                                    |
|--------|--------------------------------------------------------------|-------|----------|-------|----------|----------------------------------------------------------------------------------------------------------------------------------------------------|
| SFRP2  | Secreted frizzled-related protein 2                          | -2.43 | 1.01E-03 | -1.74 | 2.89E-02 | Soluble modulators of Wnt signaling.                                                                                                               |
| GABRR1 | Gamma-aminobutyric acid (GABA) receptor, rho 1               | -1.94 | 1.70E-04 | -1.17 | 1.62E-01 | The major inhibitory neurotransmitter.                                                                                                             |
| PRKAG3 | Protein kinase, AMP-activated, gamma 3 non-catalytic subunit | -1.88 | 2.14E-02 | -1.30 | 1.23E-01 | A regulatory subunit of the AMP-activated protein kinase (AMPK).                                                                                   |
| PLCD4  | Phospholipase C, delta 4                                     | -1.87 | 9.34E-03 | -1.44 | 4.28E-02 | Generates two second messenger molecules, inositol 1,4,5-triphosphate (IP3) and diacylglycerol, from phosphatidylinositol 4,5-bisphosphate (PIP2). |
| SFRP4  | Secreted frizzled-related protein 4                          | -1.87 | 6.55E-04 | -1.37 | 5.89E-02 | Modulator of the WNT signaling pathway.                                                                                                            |
| HOPX   | HOP homeobox                                                 | -1.77 | 5.92E-04 | 1.03  | 7.46E-01 | May interact with serum response factor (SRF).                                                                                                     |
| RALBP1 | RalA binding protein 1                                       | -1.63 | 7.02E-03 | -1.35 | 1.20E-03 | Binds the GTP-bound form of Ras-related GTPase RalA. Also interacts with Rho family member CDC42 via a specific Rho-GTPase activating domain.      |
| IGFBP5 | Insulin-like growth factor binding protein 5                 | -1.60 | 1.88E-03 | -1.01 | 9.62E-01 | May play a modulatory role in type I fiber-dominated muscles.                                                                                      |

Extracellular Matrix

|        |                                                            |       |          |       |          |                                                                                                                                                            |
|--------|------------------------------------------------------------|-------|----------|-------|----------|------------------------------------------------------------------------------------------------------------------------------------------------------------|
| FN1    | Fibronectin 1                                              | -1.74 | 2.51E-03 | -1.11 | 5.31E-01 | Cell adhesion and migration.                                                                                                                               |
| FGB    | Fibrinogen beta chain                                      | -1.73 | 2.49E-02 | -1.28 | 3.02E-01 | Fibrinogen and fibrin regulate cell adhesion and spreading, and are mitogens for several cell types.                                                       |
| EFEMP1 | EGF-containing fibulin-like extracellular matrix protein 1 | -1.62 | 8.47E-03 | -1.14 | 4.04E-01 | Extracellular matrix glycoproteins, upregulated in malignant gliomas and may play a role in the aggressive nature of these tumors.                         |
| STIM2  | Stromal interaction molecule 2                             | -1.53 | 1.89E-02 | -1.18 | 2.49E-01 | Regulate calcium concentrations in the cytosol and endoplasmic reticulum, and is involved in the activation of plasma membrane Orai Ca(2+) entry channels. |

Other

|       |                  |       |          |       |          |                                                                                                                              |
|-------|------------------|-------|----------|-------|----------|------------------------------------------------------------------------------------------------------------------------------|
| ALB   | Albumin          | -3.62 | 1.02E-02 | -1.49 | 4.41E-01 | Carrier protein for steroids, fatty acids, and thyroid hormones, and plays a role in stabilizing extracellular fluid volume. |
| GPM6B | Glycoprotein M6B | -2.29 | 2.80E-04 | -1.41 | 3.97E-02 | Involved in cellular housekeeping functions, such as membrane trafficking and cell-to-cell communication.                    |

|       |                         |       |          |       |          |                                                                                                                                  |
|-------|-------------------------|-------|----------|-------|----------|----------------------------------------------------------------------------------------------------------------------------------|
| MSTN  | Myostatin               | -2.28 | 1.50E-02 | -1.39 | 1.61E-01 | Member of the bone morphogenetic protein (BMP) family and the TGF-beta superfamily. Negatively regulates skeletal muscle growth. |
| HTRA1 | HtrA serine peptidase 1 | -1.78 | 8.89E-04 | -1.18 | 3.07E-01 | Proposed to regulate the availability of insulin-like growth factors (IGFs) by cleaving IGF-binding proteins.                    |
| HP    | Haptoglobin             | -1.63 | 3.82E-02 | -1.26 | 3.31E-01 | Produces haptoglobin, degrades hemoglobin while - at the same time - preventing loss of iron.                                    |

**Table S3g.**  
**Genes Upregulated Genes in Adipose Tissue by MRC (Normalized to Control)**

| Gene Symbol                | Gene name                                            | MR   | p value  | MRC  | p value  | Function                          |
|----------------------------|------------------------------------------------------|------|----------|------|----------|-----------------------------------|
| <i>Olfactory Receptors</i> |                                                      |      |          |      |          |                                   |
| LOC302192                  | Similar to RIKEN cDNA 1700001E04                     | 1.20 | 3.62E-01 | 1.63 | 2.03E-02 | Unknown                           |
| Olf1415                    | Olfactory receptor 1344                              | 1.39 | 8.51E-02 | 1.57 | 1.26E-02 | Interacts with odorant molecules. |
| OR52E8                     | Olfactory receptor, family 52, subfamily E, member 8 | 1.15 | 1.07E-01 | 1.54 | 4.11E-02 | Interacts with odorant molecules. |
| Olr1590                    | Olfactory receptor 1590                              | 1.08 | 5.50E-01 | 1.51 | 7.68E-03 | Interacts with odorant molecules. |

**Table S3h.**  
**Genes Downregulated in Adipose Tissue by MRC (Normalized to Control)**

| Gene Symbol                    |  | Gene name                                       | MR    | p value  | MRC   | p value  | Function                                                                          |
|--------------------------------|--|-------------------------------------------------|-------|----------|-------|----------|-----------------------------------------------------------------------------------|
| <i>Carbohydrate Metabolism</i> |  |                                                 |       |          |       |          |                                                                                   |
| SUCLG2                         |  | Succinate-CoA ligase, GDP-forming, beta subunit | -1.07 | 3.82E-01 | -1.87 | 4.44E-02 | Reversible reaction involving the formation of succinyl-CoA and succinate.        |
| <i>Calcium Binding Protein</i> |  |                                                 |       |          |       |          |                                                                                   |
| OCM2                           |  | Oncomodulin 2                                   | -1.79 | 3.61E-03 | -1.65 | 7.28E-03 | Calcium ion-binding protein of the superfamily of calmodulin proteins.            |
| S100A9                         |  | S100 calcium binding protein A9                 | -1.05 | 8.51E-01 | -1.64 | 3.97E-02 | May function in the inhibition of casein kinase.                                  |
| <i>Olfactory Receptor</i>      |  |                                                 |       |          |       |          |                                                                                   |
| Olfr544                        |  | Olfactory receptor 39                           | -1.44 | 1.35E-01 | -1.75 | 3.96E-02 | Interacts with odorant molecules.                                                 |
| Olfr661                        |  | Olfactory receptor 161                          | -1.71 | 2.73E-02 | -1.61 | 3.07E-02 | Interacts with odorant molecules.                                                 |
| <i>Immune Response</i>         |  |                                                 |       |          |       |          |                                                                                   |
| FKBPL                          |  | FK506 binding protein like                      | -1.23 | 9.17E-02 | -1.53 | 2.65E-02 | Immunoregulation, protein folding and trafficking, and control of the cell cycle. |

**Table S3i.**  
**Genes Upregulated in Liver by MRC (Normalized to Control)**

| Gene Symbol                             | Gene name                                                                                            | MR    | p value  | MRC  | p value  | Function                                                                                                                                 |
|-----------------------------------------|------------------------------------------------------------------------------------------------------|-------|----------|------|----------|------------------------------------------------------------------------------------------------------------------------------------------|
| <i>Lipid Metabolism</i>                 |                                                                                                      |       |          |      |          |                                                                                                                                          |
| ACSM3                                   | Acyl-CoA synthetase medium-chain family member 3                                                     | 3.29  | 5.63E-06 | 1.84 | 9.03E-04 | Medium chain fatty acid synthesis.                                                                                                       |
| Es1                                     | Esterase 1                                                                                           | -1.66 | 1.68E-02 | 1.59 | 1.17E-03 | Has carboxylesterase activity. May play a role in lipid metabolism.                                                                      |
| <i>Carbohydrate Metabolism</i>          |                                                                                                      |       |          |      |          |                                                                                                                                          |
| AMY1A                                   | Amylase, alpha 1A (salivary)                                                                         | 1.07  | 7.37E-01 | 3.63 | 1.75E-03 | Catalyzes the first step in digestion of dietary starch and glycogen.                                                                    |
| CRYL1                                   | Crystallin, lambda 1                                                                                 | 2.24  | 1.25E-03 | 1.58 | 1.84E-02 | Dehydrogenation of L-gulonate into dehydro-L-gulonate in the uronate cycle, which functions as an alternative glucose metabolic pathway. |
| <i>Amino Acid Metabolism</i>            |                                                                                                      |       |          |      |          |                                                                                                                                          |
| MTHFD2                                  | Methylenetetrahydrofolate dehydrogenase (NADP+ dependent) 2, methenyltetrahydrofolate cyclohydrolase | 4.54  | 1.24E-06 | 2.08 | 1.10E-02 | Conversion of 5,10-methyl THF to 5,10-methylene THF.                                                                                     |
| GCLM                                    | Glutamate-cysteine ligase, modifier subunit                                                          | 1.46  | 8.37E-02 | 1.66 | 1.05E-02 | First rate-limiting enzyme of glutathione synthesis.                                                                                     |
| CSAD                                    | Cysteine sulfinic acid decarboxylase                                                                 | 1.13  | 1.06E-01 | 1.55 | 9.25E-05 | Conversion of 3-sulfinio-L-alanine to hypotaurine in taurine biosynthesis.                                                               |
| ODC1                                    | Ornithine decarboxylase 1                                                                            | 2.21  | 1.49E-06 | 1.52 | 1.03E-02 | The rate-limiting enzyme of the polyamine biosynthesis pathway: converts ornithine to putrescine.                                        |
| SCPEP1                                  | Serine carboxypeptidase 1                                                                            | 1.73  | 2.27E-03 | 1.51 | 1.44E-02 | Serine carboxypeptidase.                                                                                                                 |
| <i>Protein Turnover</i>                 |                                                                                                      |       |          |      |          |                                                                                                                                          |
| ISG15                                   | ISG15 ubiquitin-like modifier                                                                        | -1.70 | 2.57E-02 | 1.71 | 3.65E-02 | Ubiquitin-like protein.                                                                                                                  |
| <i>Nucleotide/Nucleoside Metabolism</i> |                                                                                                      |       |          |      |          |                                                                                                                                          |
| CTPS                                    | CTP synthase                                                                                         | 2.10  | 1.25E-05 | 1.56 | 7.83E-03 | Conversion of UTP to CTP.                                                                                                                |

Metabolism Oxidation/Reduction

|         |                                                                                                                                            |       |          |      |          |                                                                                                                                                                                                        |
|---------|--------------------------------------------------------------------------------------------------------------------------------------------|-------|----------|------|----------|--------------------------------------------------------------------------------------------------------------------------------------------------------------------------------------------------------|
| Gstm3   | Glutathione S-transferase mu 3                                                                                                             | -1.23 | 1.18E-01 | 4.50 | 2.20E-03 | Member of the glutathione S-transferase family.                                                                                                                                                        |
| AKR7A3  | Aldo-keto reductase family 7, member A3 (aflatoxin aldehyde reductase)                                                                     | 6.01  | 1.73E-05 | 2.00 | 7.88E-03 | Involved in the detoxification of aldehydes and ketones.                                                                                                                                               |
| Sult2a6 | Sulfotransferase family 2A, dehydroepiandrosterone (DHEA)-preferring, member 2                                                             | 1.61  | 6.57E-03 | 1.97 | 3.05E-04 | Increased during the androgen-insensitive phases of prepuberty and senescence.                                                                                                                         |
| NR1I3   | Nuclear receptor subfamily 1, group I, member 3                                                                                            | 1.78  | 2.33E-03 | 1.90 | 9.01E-05 | Key regulator of xenobiotic and endobiotic metabolism.                                                                                                                                                 |
| ALDH1B1 | Aldehyde dehydrogenase 1 family, member B1                                                                                                 | 1.14  | 2.01E-01 | 1.84 | 1.07E-03 | Alcohol metabolism.                                                                                                                                                                                    |
| UGT2B4  | UDP glucuronosyltransferase 2 family, polypeptide B4                                                                                       | 1.66  | 7.50E-04 | 1.65 | 4.05E-04 | Transfer of glucuronate from UDP-glucuronate to beta-D-glucuronoside.                                                                                                                                  |
| AKR1C4  | Aldo-keto reductase family 1, member C4 (chlordecone reductase; 3-alpha hydroxysteroid dehydrogenase, type I; dihydrodiol dehydrogenase 4) | -1.20 | 2.65E-01 | 1.64 | 1.50E-02 | Conversion of aldehydes and ketones.                                                                                                                                                                   |
| CYP17A1 | Cytochrome P450, family 17, subfamily A, polypeptide 1                                                                                     | 1.81  | 1.09E-03 | 1.53 | 9.68E-04 | Drug metabolism, synthesis of cholesterol, steroids and other lipids, Key enzyme in the steroidogenic pathway that produces progestins, mineralocorticoids, glucocorticoids, androgens, and estrogens. |
| GSTM3   | Glutathione S-transferase mu 3 (brain)                                                                                                     | 1.13  | 1.78E-01 | 1.52 | 1.32E-03 | Detoxification of electrophilic compounds.                                                                                                                                                             |
| EPHX1   | Epoxide hydrolase 1, microsomal (xenobiotic)                                                                                               | 1.47  | 1.56E-03 | 1.52 | 5.62E-04 | Converts epoxides from the degradation of aromatic compounds to trans-dihydrodiols which can be conjugated and excreted from the body.                                                                 |

Transport

|        |                                                                               |       |          |      |          |                                                                                                                                                                                                                                                                     |
|--------|-------------------------------------------------------------------------------|-------|----------|------|----------|---------------------------------------------------------------------------------------------------------------------------------------------------------------------------------------------------------------------------------------------------------------------|
| SLC1A2 | Solute carrier family 1 (glial high affinity glutamate transporter), member 2 | -1.27 | 9.98E-04 | 3.02 | 3.54E-05 | Clears the excitatory neurotransmitter glutamate from the extracellular space at synapses.                                                                                                                                                                          |
| MUP    | Major urinary protein pseudogene                                              | -2.14 | 9.66E-04 | 1.65 | 4.36E-02 | Transport of small, hydrophobic molecules.                                                                                                                                                                                                                          |
| KCNA3  | Potassium voltage-gated channel, shaker-related subfamily, member 3           | 1.07  | 6.84E-01 | 1.57 | 4.51E-02 | Voltage-gated potassium channel, shaker-related subfamily. Belongs to the delayed rectifier class, members of which allow nerve cells to efficiently repolarize following an action potential. Also plays an essential role in T-cell proliferation and activation. |

Immune Response

|         |                                                       |       |          |      |          |                                                                                                                                                                                          |
|---------|-------------------------------------------------------|-------|----------|------|----------|------------------------------------------------------------------------------------------------------------------------------------------------------------------------------------------|
| TNFSF13 | Tumor necrosis factor (ligand) superfamily, member 13 | -1.45 | 2.02E-02 | 1.72 | 6.34E-03 | Tumor necrosis factor (TNF) ligand family member. May be able to induce apoptosis through its interaction with other TNF receptor family proteins such as TNFRSF6/FAS and TNFRSF14/HVEM. |
| Mug1    | Murinoglobulin 1                                      | 1.48  | 3.89E-03 | 1.67 | 8.35E-04 | Plasma proteinase inhibitor involved in acute phase inflammatory response.                                                                                                               |
| CXCL16  | Chemokine (C-X-C motif) ligand 16                     | 1.07  | 4.91E-01 | 1.52 | 4.81E-02 | CXC chemokine.                                                                                                                                                                           |
| CXCL13  | Chemokine (C-X-C motif) ligand 13                     | -1.04 | 5.88E-01 | 1.52 | 2.55E-04 | CXC chemokine that promotes the migration of B lymphocytes (compared to T cells and macrophages).                                                                                        |

Signal Transduction

|        |                                                           |      |          |      |          |                                                                                                                               |
|--------|-----------------------------------------------------------|------|----------|------|----------|-------------------------------------------------------------------------------------------------------------------------------|
| CDKN2C | Cyclin-dependent kinase inhibitor 2C (p18, inhibits CDK4) | 1.31 | 7.70E-02 | 2.22 | 6.67E-04 | Prevents the activation of the CDK kinases, thus function as a cell growth regulator that controls cell cycle G1 progression. |
| PDE6C  | Phosphodiesterase 6C, cGMP-specific, cone, alpha prime    | 1.13 | 2.04E-01 | 1.63 | 2.26E-03 | The alpha-prime subunit of cone phosphodiesterase.                                                                            |

Extracellular Matrix

|       |                                                  |       |          |      |          |                                                                                                      |
|-------|--------------------------------------------------|-------|----------|------|----------|------------------------------------------------------------------------------------------------------|
| CDH17 | Cadherin 17, LI cadherin (liver-intestine)       | 1.08  | 5.91E-01 | 1.95 | 6.79E-04 | Calcium-dependent, membrane-associated glycoprotein. Acts as a proton-dependent peptide transporter. |
| MMP12 | Matrix metallopeptidase 12 (macrophage elastase) | -1.01 | 8.44E-01 | 4.40 | 1.73E-02 | Degrades soluble and insoluble elastin.                                                              |
| DCN   | Decorin                                          | 1.22  | 2.06E-01 | 1.89 | 7.72E-03 | Cellular or pericellular matrix proteoglycan that plays a role in matrix assembly.                   |

Other

|      |                                                |       |          |       |          |                                                                                                          |
|------|------------------------------------------------|-------|----------|-------|----------|----------------------------------------------------------------------------------------------------------|
| Pbsn | Probasin                                       | 1.75  | 2.10E-01 | 31.14 | 5.54E-07 | Displays androgen dependent expression in prostate epithelial cells.                                     |
| NAT8 | N-acetyltransferase 8 (GCN5-related, putative) | -1.01 | 9.61E-01 | 2.47  | 1.25E-03 | Shows amino acid sequence similarity to N-acetyltransferases. May be localized in the secretory pathway. |

|        |                                                                                            |       |          |      |          |                                                                                                                                                                                                                                                                            |
|--------|--------------------------------------------------------------------------------------------|-------|----------|------|----------|----------------------------------------------------------------------------------------------------------------------------------------------------------------------------------------------------------------------------------------------------------------------------|
| TSPAN8 | Tetraspanin 8                                                                              | -1.02 | 9.23E-01 | 2.33 | 1.43E-03 | Plays a role in the regulation of cell development, activation, growth and motility.                                                                                                                                                                                       |
| MYBL1  | V-myb myeloblastosis viral oncogene homolog (avian)-like 1                                 | 1.01  | 7.46E-01 | 2.06 | 3.89E-02 | Cell proliferation.                                                                                                                                                                                                                                                        |
| CAV1   | Caveolin 1, caveolae protein, 22kDa                                                        | 1.09  | 6.60E-01 | 1.92 | 2.91E-02 | Links integrin subunits to the tyrosine kinase FYN, an initiating step in coupling integrins to the Ras-ERK pathway and promotes cell cycle progression. Is a tumor suppressor gene candidate and a negative regulator of the Ras-p42/44 mitogen-activated kinase cascade. |
| CDKN1A | Cyclin-dependent kinase inhibitor 1A (p21, Cip1)                                           | -1.13 | 5.05E-01 | 1.82 | 3.28E-02 | A potent cyclin-dependent kinase inhibitor. Inhibits the activity of cyclin-CDK2 or -CDK4 complexes.                                                                                                                                                                       |
| OMD    | Osteomodulin                                                                               | -2.08 | 4.87E-05 | 1.73 | 5.80E-04 | Cell binding keratan sulfate proteoglycan that might have a role in regulation of mineralization.                                                                                                                                                                          |
| CA2    | Carbonic anhydrase II                                                                      | 1.70  | 5.56E-03 | 1.68 | 2.78E-02 | Catalyzes reversible hydration of carbon dioxide.                                                                                                                                                                                                                          |
| SLC3A2 | Solute carrier family 3 (activators of dibasic and neutral amino acid transport), member 2 | 2.98  | 1.98E-06 | 1.63 | 3.17E-03 | Associates with integrins and mediates integrin-dependent signaling related to normal cell growth and tumorigenesis.                                                                                                                                                       |
| CA5B   | Carbonic anhydrase VB, mitochondrial                                                       | -1.53 | 3.49E-04 | 1.62 | 1.22E-05 | Sequence similar to mitochondrial carbonic anhydrases (CAs), a large family of zinc metalloenzymes that catalyze the reversible hydration of carbon dioxide.                                                                                                               |
| EMB    | Embigin                                                                                    | -1.00 | 9.85E-01 | 1.59 | 3.22E-03 | Transmembrane glycoprotein member of the immunoglobulin superfamily. May be involved in cell growth and development.                                                                                                                                                       |
| CA3    | Carbonic anhydrase III, muscle specific                                                    | -1.18 | 6.03E-02 | 1.51 | 5.31E-04 | A class of metalloenzymes that catalyze the reversible hydration of carbon dioxide.                                                                                                                                                                                        |

**Table S3j.**  
**Genes Downregulated in Liver by MRC (Normalized to Control)**

| Gene Symbol                    | Gene name                                                                      | MR    | p value  | MRC   | p value  | Function                                                                                                                                                                                                               |
|--------------------------------|--------------------------------------------------------------------------------|-------|----------|-------|----------|------------------------------------------------------------------------------------------------------------------------------------------------------------------------------------------------------------------------|
| <i>Lipid Metabolism</i>        |                                                                                |       |          |       |          |                                                                                                                                                                                                                        |
| PNPLA3                         | Patatin-like phospholipase domain containing 3                                 | -5.13 | 5.77E-04 | -4.31 | 1.27E-03 | Triacylglycerol hydrolysis.                                                                                                                                                                                            |
| CROT                           | Carnitine O-octanoyltransferase                                                | -1.93 | 2.76E-03 | -2.57 | 4.60E-04 | Converts 4,8-dimethylnonanoyl-CoA to its corresponding carnitine ester. Necessary for transport of medium- and long- chain acyl-CoA molecules out of the peroxisome to the cytosol and mitochondria.                   |
| INSIG1                         | Insulin induced gene 1                                                         | -1.93 | 1.03E-02 | -1.83 | 1.33E-03 | Regulation of cholesterol concentrations in cells.                                                                                                                                                                     |
| ACACB                          | Acetyl-CoA carboxylase beta                                                    | -2.19 | 1.99E-07 | -1.82 | 5.46E-06 | Carboxylation of acetyl-CoA to malonyl-CoA, the rate-limiting step in fatty acid synthesis. Inhibits carnitine-palmitoyl-CoA transferase I, the rate-limiting step in fatty acid uptake and oxidation by mitochondria. |
| FADS2                          | Fatty acid desaturase 2                                                        | -1.11 | 1.89E-02 | -1.70 | 3.95E-06 | Regulates the unsaturation of fatty acids through the introduction of double bonds between defined carbons of the fatty acyl chain.                                                                                    |
| ACLY                           | ATP citrate lyase                                                              | -2.07 | 1.04E-03 | -1.65 | 1.52E-02 | Formation of acetyl-CoA and oxaloacetate from citrate and CoA.                                                                                                                                                         |
| Elovl2                         | Elongation of very long chain fatty acids (FEN1/Elo2, SUR4/Elo3, yeast)-like 2 | -1.20 | 3.49E-02 | -1.58 | 3.04E-04 | Synthesis of very long chain fatty acids.                                                                                                                                                                              |
| FADS1                          | Fatty acid desaturase 1                                                        | -1.20 | 1.01E-02 | -1.55 | 6.22E-06 | Regulates the unsaturation of fatty acids through the introduction of double bonds between defined carbons of the fatty acyl chain.                                                                                    |
| ME1                            | Malic enzyme 1, NADP(+)-dependent, cytosolic                                   | 1.70  | 5.64E-03 | -2.44 | 4.45E-04 | Generates NADPH for fatty acid biosynthesis Links the glycolytic and citric acid cycles.                                                                                                                               |
| <i>Carbohydrate Metabolism</i> |                                                                                |       |          |       |          |                                                                                                                                                                                                                        |
| G6PD                           | Glucose-6-phosphate dehydrogenase                                              | -1.14 | 5.55E-01 | -1.93 | 3.99E-03 | Cytosolic enzyme encoded by a housekeeping X-linked gene whose main function is to produce NADPH, a key electron donor in the defense against oxidizing agents and in reductive biosynthetic reactions.                |

Amino Acid Metabolism

|      |                                           |       |          |       |          |
|------|-------------------------------------------|-------|----------|-------|----------|
| OAT  | Ornithine aminotransferase                | -3.68 | 1.65E-05 | -1.59 | 1.32E-02 |
| BHMT | Betaine--homocysteine S-methyltransferase | 1.07  | 1.87E-01 | -1.53 | 5.39E-05 |

Mitochondrial enzyme ornithine aminotransferase is a key enzyme in the pathway that converts arginine and ornithine into the major excitatory and inhibitory neurotransmitters glutamate and GABA.

Encodes a cytosolic enzyme that catalyzes the conversion of betaine and homocysteine to dimethylglycine and methionine.

Immune Response

|     |                                |       |          |       |          |
|-----|--------------------------------|-------|----------|-------|----------|
| MME | Membrane metallo-endopeptidase | -2.11 | 8.01E-06 | -1.89 | 3.46E-05 |
|-----|--------------------------------|-------|----------|-------|----------|

Encodes a common acute lymphocytic leukemia antigen that is an important cell surface marker in the diagnosis of human acute lymphocytic leukemia (ALL),. Is a neutral endopeptidase that cleaves peptides at the amino side of hydrophobic residues and inactivates several peptide hormones including glucagon, enkephalins, substance P, neurotensin, oxytocin, and bradykinin.

Signal Transduction

|       |                                     |       |          |       |          |
|-------|-------------------------------------|-------|----------|-------|----------|
| RGS16 | Regulator of G-protein signaling 16 | -2.51 | 8.45E-03 | -2.05 | 3.66E-02 |
| EPHA3 | EPH receptor A3                     | -1.86 | 1.80E-05 | -1.89 | 3.43E-06 |

Regulator of G protein signaling family. Inhibits signal transduction by increasing the GTPase activity of G protein alpha subunits. May also play a role in regulating the kinetics of signaling in the phototransduction cascade.

Belongs to the ephrin receptor subfamily of the protein-tyrosine kinase family. The EPH receptor family is divided into 2 groups based on the similarity of their extracellular domain sequences and their affinities for binding ephrin-A and ephrin-B ligands. This gene encodes a protein that binds ephrin-A ligands.

Other

COMT

Catechol-O-methyltransferase

-1.48

1.35E-03

-1.53

1.23E-04

Catalyzes the transfer of a methyl group from S-adenosylmethionine to catecholamines, including the neurotransmitters dopamine, epinephrine, and norepinephrine. O-methylation results in one of the major degradative pathways of the catecholamine transmitters.

**Table S3k.**  
**Genes Upregulated in Muscle by MRC (Normalized to Control)**

| Gene Symbol                    |  | Gene name                                                  | MR   | p value  | MRC  | p value  | Function                                                                                                                                                                                                                                            |
|--------------------------------|--|------------------------------------------------------------|------|----------|------|----------|-----------------------------------------------------------------------------------------------------------------------------------------------------------------------------------------------------------------------------------------------------|
| <i>Myofibrillar Components</i> |  |                                                            |      |          |      |          |                                                                                                                                                                                                                                                     |
| TNNI1                          |  | Troponin I type 1 (skeletal, slow)                         | 5.21 | 1.19E-02 | 2.37 | 2.76E-02 | Slow twitch muscle inhibitory troponin subunit, blocks actin-myosin interactions and thereby mediates striated muscle relaxation.                                                                                                                   |
| <i>Calcium-Binding Protein</i> |  |                                                            |      |          |      |          |                                                                                                                                                                                                                                                     |
| CASQ2                          |  | Calsequestrin 2 (cardiac muscle)                           | 2.89 | 2.32E-02 | 1.91 | 5.24E-03 | Stores calcium for muscle function.                                                                                                                                                                                                                 |
| <i>Transport</i>               |  |                                                            |      |          |      |          |                                                                                                                                                                                                                                                     |
| ATP1B1                         |  | ATPase, Na+/K+ transporting, beta 1 polypeptide            | 1.62 | 7.82E-02 | 1.61 | 4.61E-02 | Establishes and maintains electrochemical gradients of Na and K ions across the muscle plasma membrane essential for osmoregulation, for sodium-coupled transport of a variety of organic and inorganic molecules, and for electrical excitability. |
| <i>Protein Turnover</i>        |  |                                                            |      |          |      |          |                                                                                                                                                                                                                                                     |
| UBE2I                          |  | Ubiquitin-conjugating enzyme E2I (UBC9 homolog, yeast)     | 1.69 | 1.84E-02 | 1.53 | 4.72E-02 | Member of the E2 ubiquitin-conjugating enzyme family.                                                                                                                                                                                               |
| <i>Other</i>                   |  |                                                            |      |          |      |          |                                                                                                                                                                                                                                                     |
| CSRP3                          |  | Cysteine and glycine-rich protein 3 (cardiac LIM protein)  | 3.21 | 1.65E-02 | 2.54 | 1.45E-02 | Development and cellular differentiation.                                                                                                                                                                                                           |
| FHL1                           |  | Four and a half LIM domains 1                              | 1.99 | 4.63E-03 | 1.78 | 8.29E-03 | Member of the four-and-a-half-LIM-only protein family involved in many cellular processes.                                                                                                                                                          |
| GEMIN7                         |  | Gem (nuclear organelle) associated protein 7               | 1.55 | 1.86E-01 | 1.74 | 3.56E-02 | Required for pre-mRNA splicing in the nucleus.                                                                                                                                                                                                      |
| HSPB7                          |  | Heat shock 27kDa protein family, member 7 (cardiovascular) | 2.04 | 1.75E-02 | 1.60 | 5.63E-03 | Heat shock protein that binds alpha-filamin.                                                                                                                                                                                                        |
| RNASE6                         |  | Ribonuclease, RNase A family, k6                           | 1.22 | 2.61E-01 | 1.53 | 3.10E-02 | RNA degradation.                                                                                                                                                                                                                                    |

**Table S3l.**  
**Genes Downregulated in Muscle by MRC (Normalized to Control)**

| Gene Symbol                |  | Gene name                                                         | MR    | p value  | MRC   | p value  | Function                                                                                                                                                   |
|----------------------------|--|-------------------------------------------------------------------|-------|----------|-------|----------|------------------------------------------------------------------------------------------------------------------------------------------------------------|
| <i>Signal Transduction</i> |  |                                                                   |       |          |       |          |                                                                                                                                                            |
| SFRP2                      |  | Secreted frizzled-related protein 2                               | -2.43 | 1.01E-03 | -1.74 | 2.89E-02 | Soluble modulator of Wnt signaling.                                                                                                                        |
| Taar7d                     |  | Trace amine-associated receptor 7C                                | -1.26 | 3.93E-01 | -1.52 | 3.61E-02 | Neurotransmitters/neuromodulators of trace amines.                                                                                                         |
| <i>Other</i>               |  |                                                                   |       |          |       |          |                                                                                                                                                            |
| RASSF9                     |  | Ras association (RalGDS/AF-6) domain family (N-terminal) member 9 | -1.11 | 6.03E-01 | -1.69 | 2.59E-02 | Associates with peptidylglycine alpha-amidating monooxygenase and is involved with the trafficking of this enzyme through secretory or endosomal pathways. |
| NAT8B                      |  | N-acetyltransferase 8B (GCN5-related, putative, gene/pseudogene)  | -1.31 | 3.38E-01 | -1.67 | 7.93E-03 | Drug resistance.                                                                                                                                           |
| SNRPD2                     |  | Small nuclear ribonucleoprotein D2 polypeptide 16.5kDa            | -1.31 | 1.73E-01 | -1.52 | 3.26E-02 | Required for pre-mRNA splicing and small nuclear ribonucleoprotein biogenesis.                                                                             |
