# Supplementary material
Source: publisher figshare collection journal article supplement (https://karger.figshare.com/articles/dataset/_/5123644)
Supplement: Supplementary file 11 [file 1 › 000339347_sm_Table_S10.pdf]

| Table S10. Heat map of statistically significant biochemicals profiled in skeletal muscle. Shaded cells indicate $p \leq 0.05$ (red indicates that the mean values are significantly higher for that comparison; green values significantly lower). Blue-bolded text indicates $0.05 < p < 0.10$ . |                                    |               | Fold of Change             |                       |                       |
|----------------------------------------------------------------------------------------------------------------------------------------------------------------------------------------------------------------------------------------------------------------------------------------------------|------------------------------------|---------------|----------------------------|-----------------------|-----------------------|
|                                                                                                                                                                                                                                                                                                    |                                    |               | Welch's Two Sample t-Tests |                       |                       |
| PATHWAY SORT                                                                                                                                                                                                                                                                                       | BIOCHEMICAL NAME                   | SUPER PATHWAY | <u>MR</u><br>CF            | <u>MR + CYS</u><br>CF | <u>MR</u><br>MR + CYS |
| 1                                                                                                                                                                                                                                                                                                  | glycine                            | Amino acid    | 0.84                       | 0.85                  | 0.98                  |
| 2                                                                                                                                                                                                                                                                                                  | sarcosine (N-Methylglycine)        | Amino acid    | 0.93                       | 0.77                  | 1.22                  |
| 4                                                                                                                                                                                                                                                                                                  | N-acetyl glycine                   | Amino acid    | 1.03                       | 0.77                  | 1.33                  |
| 7                                                                                                                                                                                                                                                                                                  | serine                             | Amino acid    | 4.21                       | 1.16                  | 3.62                  |
| 16                                                                                                                                                                                                                                                                                                 | threonine                          | Amino acid    | 2.62                       | 0.86                  | 3.04                  |
| 21                                                                                                                                                                                                                                                                                                 | betaine                            | Amino acid    | 0.66                       | 0.94                  | 0.71                  |
| 23                                                                                                                                                                                                                                                                                                 | alanine                            | Amino acid    | 1.12                       | 1.11                  | 1.01                  |
| 24                                                                                                                                                                                                                                                                                                 | beta-alanine                       | Amino acid    | 1.16                       | 0.75                  | 1.55                  |
| 29                                                                                                                                                                                                                                                                                                 | aspartate                          | Amino acid    | 1.22                       | 1.12                  | 1.09                  |
| 31                                                                                                                                                                                                                                                                                                 | N-acetyl aspartate (NAA)           | Amino acid    | 1.50                       | 1.59                  | 0.95                  |
| 38                                                                                                                                                                                                                                                                                                 | glutamate                          | Amino acid    | 1.27                       | 1.24                  | 1.02                  |
| 42                                                                                                                                                                                                                                                                                                 | glutamine                          | Amino acid    | 1.51                       | 1.25                  | 1.20                  |
| 46                                                                                                                                                                                                                                                                                                 | N-acetyl-aspartyl-glutamate (NAAG) | Amino acid    | 1.14                       | 1.10                  | 1.03                  |
| 48                                                                                                                                                                                                                                                                                                 | histidine                          | Amino acid    | 3.44                       | 0.47                  | 7.31                  |
| 51                                                                                                                                                                                                                                                                                                 | 3-methylhistidine                  | Amino acid    | 0.51                       | 1.20                  | 0.42                  |
| 53                                                                                                                                                                                                                                                                                                 | histamine                          | Amino acid    | 1.12                       | 0.97                  | 1.15                  |
| 66                                                                                                                                                                                                                                                                                                 | lysine                             | Amino acid    | 1.54                       | 1.07                  | 1.44                  |
| 69                                                                                                                                                                                                                                                                                                 | pipecolate                         | Amino acid    | 0.89                       | 1.18                  | 0.75                  |
| 78                                                                                                                                                                                                                                                                                                 | phenylalanine                      | Amino acid    | 0.76                       | 1.01                  | 0.76                  |
| 90                                                                                                                                                                                                                                                                                                 | tyrosine                           | Amino acid    | 0.52                       | 1.01                  | 0.52                  |
| 91                                                                                                                                                                                                                                                                                                 | 3-(4-hydroxyphenyl)lactate         | Amino acid    | 0.40                       | 1.36                  | 0.29                  |
| 124                                                                                                                                                                                                                                                                                                | kynurenate                         | Amino acid    | 0.72                       | 0.43                  | 1.66                  |
| 125                                                                                                                                                                                                                                                                                                | kynurenine                         | Amino acid    | 0.58                       | 0.46                  | 1.25                  |
| 126                                                                                                                                                                                                                                                                                                | tryptophan                         | Amino acid    | 0.71                       | 1.00                  | 0.70                  |
| 141                                                                                                                                                                                                                                                                                                | C-glycosyltryptophan*              | Amino acid    | 0.82                       | 1.17                  | 0.70                  |
| 149                                                                                                                                                                                                                                                                                                | 3-methyl-2-oxobutyrate             | Amino acid    | 1.09                       | 0.67                  | 1.62                  |
| 150                                                                                                                                                                                                                                                                                                | 3-methyl-2-oxovalerate             | Amino acid    | 0.92                       | 0.66                  | 1.39                  |
| 157                                                                                                                                                                                                                                                                                                | isoleucine                         | Amino acid    | 0.96                       | 0.95                  | 1.01                  |
| 158                                                                                                                                                                                                                                                                                                | leucine                            | Amino acid    | 0.89                       | 1.00                  | 0.89                  |
| 167                                                                                                                                                                                                                                                                                                | valine                             | Amino acid    | 1.00                       | 0.96                  | 1.03                  |
| 170                                                                                                                                                                                                                                                                                                | 4-methyl-2-oxopentanoate           | Amino acid    | 1.06                       | 0.79                  | 1.34                  |
| 177                                                                                                                                                                                                                                                                                                | isobutyrylcarnitine                | Amino acid    | 0.64                       | 0.84                  | 0.76                  |
| 179                                                                                                                                                                                                                                                                                                | 2-methylbutyrylcarnitine           | Amino acid    | 0.48                       | 0.88                  | 0.55                  |
| 181                                                                                                                                                                                                                                                                                                | isovalerylcarnitine                | Amino acid    | 0.55                       | 0.84                  | 0.66                  |
| 182                                                                                                                                                                                                                                                                                                | hydroxyisovaleroyl carnitine       | Amino acid    | 1.45                       | 0.96                  | 1.52                  |
| 188                                                                                                                                                                                                                                                                                                | cysteine                           | Amino acid    | 0.80                       | 1.15                  | 0.69                  |
| 195                                                                                                                                                                                                                                                                                                | hypotaurine                        | Amino acid    | 0.24                       | 2.14                  | 0.11                  |
| 196                                                                                                                                                                                                                                                                                                | taurine                            | Amino acid    | 0.42                       | 1.34                  | 0.32                  |
| 198                                                                                                                                                                                                                                                                                                | S-adenosylhomocysteine (SAH)       | Amino acid    | 1.18                       | 1.00                  | 1.19                  |
| 199                                                                                                                                                                                                                                                                                                | methionine                         | Amino acid    | 0.49                       | 0.76                  | 0.64                  |
| 201                                                                                                                                                                                                                                                                                                | N-acetylmethionine                 | Amino acid    | 0.75                       | 1.05                  | 0.71                  |
| 213                                                                                                                                                                                                                                                                                                | arginine                           | Amino acid    | 1.79                       | 1.22                  | 1.47                  |
| 216                                                                                                                                                                                                                                                                                                | ornithine                          | Amino acid    | 4.98                       | 1.03                  | 4.84                  |
| 217                                                                                                                                                                                                                                                                                                | urea                               | Amino acid    | 1.28                       | 1.07                  | 1.20                  |
| 218                                                                                                                                                                                                                                                                                                | proline                            | Amino acid    | 0.91                       | 0.98                  | 0.93                  |
| 220                                                                                                                                                                                                                                                                                                | citrulline                         | Amino acid    | 1.28                       | 1.14                  | 1.13                  |
| 224                                                                                                                                                                                                                                                                                                | trans-4-hydroxyproline             | Amino acid    | 0.48                       | 1.21                  | 0.40                  |
| 232                                                                                                                                                                                                                                                                                                | creatine                           | Amino acid    | 1.03                       | 0.96                  | 1.07                  |

|       |                                                           |              |      |      |      |
|-------|-----------------------------------------------------------|--------------|------|------|------|
| 233   | creatinine                                                | Amino acid   | 1.06 | 1.01 | 1.05 |
| 235   | 2-aminobutyrate                                           | Amino acid   | 1.40 | 0.88 | 1.58 |
| 238   | 5-methylthioadenosine (MTA)                               | Amino acid   | 1.03 | 0.99 | 1.04 |
| 242   | spermidine                                                | Amino acid   | 0.99 | 0.85 | 1.17 |
| 251   | glutathione, reduced (GSH)                                | Amino acid   | 0.39 | 0.64 | 0.61 |
| 253   | 5-oxoproline                                              | Amino acid   | 1.51 | 1.08 | 1.40 |
| 254   | glutathione, oxidized (GSSG)                              | Amino acid   | 0.59 | 1.15 | 0.52 |
| 255   | cysteine-glutathione disulfide                            | Amino acid   | 0.59 | 1.25 | 0.47 |
| 256   | ophthalmate                                               | Amino acid   | 4.38 | 0.75 | 5.85 |
| 261   | glycylvaline                                              | Peptide      | 0.87 | 0.83 | 1.05 |
| 265   | glycylisoleucine                                          | Peptide      | 0.77 | 0.88 | 0.88 |
| 266   | glycylleucine                                             | Peptide      | 0.81 | 1.06 | 0.77 |
| 274   | alanylvaline                                              | Peptide      | 0.68 | 0.86 | 0.80 |
| 278   | alanylleucine                                             | Peptide      | 0.80 | 0.97 | 0.83 |
| 283   | alanylisoleucine                                          | Peptide      | 0.61 | 0.79 | 0.77 |
| 283.5 | alanylphenylalanine                                       | Peptide      | 0.77 | 0.93 | 0.83 |
| 285   | alanyltyrosine                                            | Peptide      | 0.69 | 0.87 | 0.78 |
| 286   | aspartylphenylalanine                                     | Peptide      | 0.67 | 0.93 | 0.72 |
| 287   | alpha-glutamylglutamate                                   | Peptide      | 1.05 | 1.15 | 0.92 |
| 289   | prolylleucine                                             | Peptide      | 0.73 | 0.99 | 0.73 |
| 292   | isoleucylleucine                                          | Peptide      | 0.95 | 0.89 | 1.06 |
| 295   | leucylleucine                                             | Peptide      | 0.69 | 0.91 | 0.76 |
| 299   | threonylphenylalanine                                     | Peptide      | 0.82 | 1.01 | 0.81 |
| 316   | carnosine                                                 | Peptide      | 1.18 | 0.87 | 1.36 |
| 318   | anserine                                                  | Peptide      | 1.01 | 0.96 | 1.06 |
| 374   | N-acetylneuraminate                                       | Carbohydrate | 0.69 | 1.22 | 0.56 |
| 389   | fructose                                                  | Carbohydrate | 2.01 | 1.19 | 1.69 |
| 390   | galactitol (dulcitol)                                     | Carbohydrate | 0.54 | 0.76 | 0.71 |
| 395.5 | 6'-sialyllactose                                          | Carbohydrate | 0.83 | 0.97 | 0.86 |
| 397   | maltose                                                   | Carbohydrate | 1.77 | 0.91 | 1.95 |
| 398   | mannitol                                                  | Carbohydrate | 0.56 | 1.15 | 0.48 |
| 404   | mannose-6-phosphate                                       | Carbohydrate | 4.28 | 1.03 | 4.14 |
| 410   | sorbitol                                                  | Carbohydrate | 1.03 | 1.23 | 0.83 |
| 417   | maltotriose                                               | Carbohydrate | 2.61 | 1.05 | 2.50 |
| 423   | maltotetraose                                             | Carbohydrate | 3.12 | 0.82 | 3.79 |
| 430   | 1,5-anhydroglucitol (1,5-AG)                              | Carbohydrate | 2.18 | 0.99 | 2.21 |
| 432   | glycerate                                                 | Carbohydrate | 1.36 | 0.75 | 1.83 |
| 434   | glucose-6-phosphate (G6P)                                 | Carbohydrate | 4.10 | 1.01 | 4.08 |
| 435   | glucose 1-phosphate                                       | Carbohydrate | 3.67 | 1.17 | 3.14 |
| 436   | glucose                                                   | Carbohydrate | 1.14 | 0.98 | 1.17 |
| 439   | fructose-6-phosphate                                      | Carbohydrate | 3.85 | 0.98 | 3.91 |
| 442   | Isobar: fructose 1,6-diphosphate, glucose 1,6-diphosphate | Carbohydrate | 2.84 | 0.83 | 3.43 |
| 443   | 2-phosphoglycerate                                        | Carbohydrate | 0.93 | 0.47 | 2.00 |
| 444   | 3-phosphoglycerate                                        | Carbohydrate | 1.20 | 0.54 | 2.21 |
| 449   | phosphoenolpyruvate (PEP)                                 | Carbohydrate | 1.16 | 0.71 | 1.64 |
| 450   | pyruvate                                                  | Carbohydrate | 1.11 | 0.56 | 1.97 |
| 451   | lactate                                                   | Carbohydrate | 0.96 | 0.98 | 0.97 |
| 468   | ribose                                                    | Carbohydrate | 0.77 | 1.19 | 0.65 |
| 471   | ribose 5-phosphate                                        | Carbohydrate | 1.06 | 1.00 | 1.06 |
| 473   | ribulose                                                  | Carbohydrate | 1.21 | 1.94 | 0.63 |
| 475   | Isobar: ribulose 5-phosphate, xylulose 5-phosphate        | Carbohydrate | 0.71 | 1.27 | 0.56 |
| 491   | citrate                                                   | Energy       | 0.53 | 1.06 | 0.50 |
| 502   | succinylcarnitine                                         | Energy       | 1.40 | 1.60 | 0.88 |
| 504   | fumarate                                                  | Energy       | 1.05 | 1.92 | 0.54 |
| 507   | malate                                                    | Energy       | 1.44 | 1.60 | 0.90 |

|        |                                            |        |      |      |      |
|--------|--------------------------------------------|--------|------|------|------|
| 511    | phosphate                                  | Energy | 1.08 | 1.14 | 0.94 |
| 512.5  | linoleate (18:2n6)                         | Lipid  | 0.83 | 1.16 | 0.72 |
| 516    | linolenate [alpha or gamma; (18:3n3 or 6)] | Lipid  | 0.75 | 1.19 | 0.63 |
| 517    | dihomo-linolenate (20:3n3 or n6)           | Lipid  | 1.02 | 1.80 | 0.56 |
| 519    | docosapentaenoate (n3 DPA; 22:5n3)         | Lipid  | 1.37 | 2.61 | 0.52 |
| 520    | docosapentaenoate (n6 DPA; 22:5n6)         | Lipid  | 1.12 | 0.57 | 1.96 |
| 521    | docosahexaenoate (DHA; 22:6n3)             | Lipid  | 1.78 | 1.50 | 1.18 |
| 525    | caproate (6:0)                             | Lipid  | 1.42 | 1.00 | 1.42 |
| 526    | heptanoate (7:0)                           | Lipid  | 0.92 | 1.01 | 0.91 |
| 527    | caprylate (8:0)                            | Lipid  | 0.92 | 1.10 | 0.84 |
| 528    | pelargonate (9:0)                          | Lipid  | 1.04 | 1.09 | 0.96 |
| 529    | caprate (10:0)                             | Lipid  | 1.17 | 1.21 | 0.97 |
| 530    | undecanoate (11:0)                         | Lipid  | 1.33 | 1.07 | 1.25 |
| 532    | laurate (12:0)                             | Lipid  | 1.06 | 1.02 | 1.04 |
| 535    | myristate (14:0)                           | Lipid  | 0.99 | 1.18 | 0.83 |
| 536    | myristoleate (14:1n5)                      | Lipid  | 1.25 | 1.25 | 1.00 |
| 537    | pentadecanoate (15:0)                      | Lipid  | 0.77 | 0.91 | 0.84 |
| 538    | palmitate (16:0)                           | Lipid  | 0.93 | 1.08 | 0.86 |
| 539    | palmitoleate (16:1n7)                      | Lipid  | 0.91 | 1.31 | 0.70 |
| 541    | margarate (17:0)                           | Lipid  | 0.68 | 1.02 | 0.66 |
| 542    | 10-heptadecenoate (17:1n7)                 | Lipid  | 0.88 | 1.10 | 0.80 |
| 543    | stearate (18:0)                            | Lipid  | 1.06 | 1.14 | 0.93 |
| 545    | oleate (18:1n9)                            | Lipid  | 0.76 | 0.98 | 0.77 |
| 547    | cis-vaccenate (18:1n7)                     | Lipid  | 0.45 | 0.77 | 0.58 |
| 553    | nonadecanoate (19:0)                       | Lipid  | 1.01 | 1.01 | 0.99 |
| 554    | 10-nonadecenoate (19:1n9)                  | Lipid  | 0.65 | 0.96 | 0.68 |
| 559    | eicosenoate (20:1n9 or 11)                 | Lipid  | 0.76 | 1.39 | 0.55 |
| 561    | dihomo-linoleate (20:2n6)                  | Lipid  | 0.73 | 1.46 | 0.50 |
| 565    | arachidonate (20:4n6)                      | Lipid  | 0.71 | 1.13 | 0.63 |
| 571    | adrenate (22:4n6)                          | Lipid  | 0.72 | 1.20 | 0.60 |
| 591    | 4-hydroxybutyrate (GHB)                    | Lipid  | 0.48 | 1.38 | 0.35 |
| 608    | 13-HODE + 9-HODE                           | Lipid  | 0.64 | 1.65 | 0.39 |
| 610    | 2-hydroxyglutarate                         | Lipid  | 1.39 | 0.91 | 1.52 |
| 632.65 | methyl palmitate (15 or 2)                 | Lipid  | 0.78 | 0.89 | 0.88 |
| 683    | propionylcarnitine                         | Lipid  | 0.76 | 1.16 | 0.65 |
| 685    | butyrylcarnitine                           | Lipid  | 1.02 | 1.54 | 0.67 |
| 690.5  | malonylcarnitine                           | Lipid  | 1.06 | 1.39 | 0.76 |
| 691    | deoxycarnitine                             | Lipid  | 1.00 | 0.75 | 1.34 |
| 692    | carnitine                                  | Lipid  | 1.06 | 1.10 | 0.96 |
| 693    | 3-dehydrocarnitine*                        | Lipid  | 1.64 | 0.66 | 2.49 |
| 694    | acetylcarnitine                            | Lipid  | 0.84 | 1.13 | 0.75 |
| 696    | hexanoylcarnitine                          | Lipid  | 1.33 | 1.87 | 0.71 |
| 709    | cholate                                    | Lipid  | 0.68 | 0.73 | 0.93 |
| 746    | ethanolamine                               | Lipid  | 1.17 | 1.12 | 1.05 |
| 747    | phosphoethanolamine                        | Lipid  | 1.03 | 1.16 | 0.89 |
| 751    | choline                                    | Lipid  | 0.76 | 0.96 | 0.79 |
| 752    | glycerol 3-phosphate (G3P)                 | Lipid  | 0.90 | 0.35 | 2.54 |
| 753    | glycerophosphorylcholine (GPC)             | Lipid  | 0.85 | 1.14 | 0.75 |
| 760    | myo-inositol                               | Lipid  | 1.31 | 1.41 | 0.92 |
| 763    | inositol 1-phosphate (I1P)                 | Lipid  | 1.25 | 1.53 | 0.82 |
| 769    | 3-hydroxybutyrate (BHBA)                   | Lipid  | 3.22 | 1.70 | 1.89 |
| 775    | 1-palmitoylglycerophosphoethanolamine      | Lipid  | 1.38 | 1.47 | 0.94 |
| 776    | 2-palmitoylglycerophosphoethanolamine*     | Lipid  | 1.00 | 1.70 | 0.59 |
| 780    | 1-stearoylglycerophosphoethanolamine       | Lipid  | 1.19 | 1.98 | 0.60 |
| 781    | 1-oleoylglycerophosphoethanolamine         | Lipid  | 1.06 | 2.18 | 0.49 |

|        |                                               |                        |      |      |      |
|--------|-----------------------------------------------|------------------------|------|------|------|
| 782    | 2-oleoylglycerophosphoethanolamine*           | Lipid                  | 1.38 | 1.73 | 0.80 |
| 783    | 1-linoleoylglycerophosphoethanolamine*        | Lipid                  | 1.48 | 1.68 | 0.88 |
| 784    | 2-linoleoylglycerophosphoethanolamine*        | Lipid                  | 1.64 | 2.12 | 0.77 |
| 785    | 1-arachidonoylglycerophosphoethanolamine*     | Lipid                  | 0.95 | 1.19 | 0.79 |
| 786    | 2-arachidonoylglycerophosphoethanolamine*     | Lipid                  | 1.15 | 1.99 | 0.58 |
| 787    | 2-docosapentaenoylglycerophosphoethanolamine* | Lipid                  | 1.53 | 2.50 | 0.61 |
| 788    | 2-docosahexaenoylglycerophosphoethanolamine*  | Lipid                  | 1.55 | 2.03 | 0.76 |
| 794    | 1-palmitoylglycerophosphocholine              | Lipid                  | 0.92 | 1.34 | 0.68 |
| 795    | 2-palmitoylglycerophosphocholine*             | Lipid                  | 0.91 | 1.05 | 0.86 |
| 799    | 1-stearoylglycerophosphocholine               | Lipid                  | 0.49 | 0.88 | 0.56 |
| 801    | 1-oleoylglycerophosphocholine                 | Lipid                  | 0.89 | 1.38 | 0.65 |
| 802    | 2-oleoylglycerophosphocholine*                | Lipid                  | 1.45 | 1.79 | 0.81 |
| 803    | 1-linoleoylglycerophosphocholine              | Lipid                  | 1.58 | 3.34 | 0.47 |
| 804    | 2-linoleoylglycerophosphocholine*             | Lipid                  | 1.97 | 2.86 | 0.69 |
| 810    | 2-arachidonoylglycerophosphocholine*          | Lipid                  | 0.98 | 1.51 | 0.65 |
| 814    | 2-docosahexaenoylglycerophosphocholine*       | Lipid                  | 1.21 | 1.34 | 0.90 |
| 818    | 1-stearoylglycerophosphoinositol              | Lipid                  | 1.38 | 1.48 | 0.93 |
| 821    | 1-arachidonoylglycerophosphoinositol*         | Lipid                  | 0.99 | 1.30 | 0.76 |
| 825.5  | 1-palmitoylplasmenylethanolamine*             | Lipid                  | 1.20 | 2.01 | 0.60 |
| 831    | 1-palmitoylglycerol (1-monopalmitin)          | Lipid                  | 1.03 | 1.47 | 0.70 |
| 833    | 1-stearoylglycerol (1-monostearin)            | Lipid                  | 1.16 | 1.38 | 0.84 |
| 835    | 1-oleoylglycerol (1-monoolein)                | Lipid                  | 0.75 | 0.85 | 0.88 |
| 855    | sphingosine                                   | Lipid                  | 0.95 | 1.41 | 0.67 |
| 864    | palmitoyl sphingomyelin                       | Lipid                  | 0.88 | 1.04 | 0.84 |
| 865    | stearoyl sphingomyelin                        | Lipid                  | 1.12 | 1.21 | 0.92 |
| 880    | squalene                                      | Lipid                  | 1.50 | 1.73 | 0.87 |
| 881    | cholesterol                                   | Lipid                  | 1.16 | 1.17 | 0.99 |
| 884    | 7-alpha-hydroxycholesterol                    | Lipid                  | 0.98 | 0.47 | 2.08 |
| 885    | 7-beta-hydroxycholesterol                     | Lipid                  | 1.08 | 0.90 | 1.19 |
| 916    | beta-sitosterol                               | Lipid                  | 1.06 | 1.80 | 0.59 |
| 918    | campesterol                                   | Lipid                  | 0.97 | 1.85 | 0.52 |
| 947    | xanthine                                      | Nucleotide             | 0.75 | 0.90 | 0.83 |
| 950    | hypoxanthine                                  | Nucleotide             | 0.64 | 1.24 | 0.51 |
| 951    | inosine                                       | Nucleotide             | 0.94 | 1.19 | 0.78 |
| 953    | inosine 5'-monophosphate (IMP)                | Nucleotide             | 1.04 | 0.99 | 1.05 |
| 955    | adenine                                       | Nucleotide             | 1.17 | 1.08 | 1.08 |
| 958    | N1-methyladenosine                            | Nucleotide             | 0.86 | 1.10 | 0.79 |
| 964    | adenosine 5'-monophosphate (AMP)              | Nucleotide             | 1.63 | 1.16 | 1.41 |
| 977    | guanosine                                     | Nucleotide             | 1.22 | 1.33 | 0.92 |
| 979    | guanosine 5'- monophosphate (5'-GMP)          | Nucleotide             | 0.92 | 1.21 | 0.76 |
| 994    | urate                                         | Nucleotide             | 0.46 | 0.88 | 0.52 |
| 995    | allantoin                                     | Nucleotide             | 1.22 | 1.31 | 0.93 |
| 997    | cytidine                                      | Nucleotide             | 0.81 | 1.30 | 0.62 |
| 1001   | cytidine 5'-monophosphate (5'-CMP)            | Nucleotide             | 0.90 | 0.89 | 1.01 |
| 1006   | 2'-deoxycytidine                              | Nucleotide             | 0.65 | 1.14 | 0.57 |
| 1022   | uracil                                        | Nucleotide             | 0.91 | 1.23 | 0.74 |
| 1023   | 5,6-dihydrouracil                             | Nucleotide             | 1.14 | 1.15 | 0.99 |
| 1024   | uridine                                       | Nucleotide             | 0.78 | 1.14 | 0.68 |
| 1030.2 | uridine monophosphate (5' or 3')              | Nucleotide             | 1.01 | 0.91 | 1.11 |
| 1036   | methylphosphate                               | Nucleotide             | 0.98 | 1.04 | 0.94 |
| 1041   | dehydroascorbate                              | Cofactors and vitamins | 0.72 | 0.82 | 0.88 |
| 1063   | nicotinamide                                  | Cofactors and vitamins | 1.20 | 1.04 | 1.15 |
| 1066   | nicotinamide adenine dinucleotide (NAD+)      | Cofactors and vitamins | 0.34 | 0.45 | 0.75 |
| 1074   | adenosine 5'diphosphoribose                   | Cofactors and vitamins | 2.07 | 0.51 | 4.06 |
| 1085   | pantothenate                                  | Cofactors and vitamins | 1.08 | 1.51 | 0.72 |

|      |                                   |                        |      |      |      |
|------|-----------------------------------|------------------------|------|------|------|
| 1086 | phosphopantetheine                | Cofactors and vitamins | 0.73 | 1.32 | 0.55 |
| 1088 | 3'-dephosphocoenzyme A            | Cofactors and vitamins | 0.84 | 1.03 | 0.82 |
| 1098 | flavin adenine dinucleotide (FAD) | Cofactors and vitamins | 1.17 | 1.56 | 0.75 |
| 1135 | benzoate                          | Xenobiotics            | 1.12 | 1.06 | 1.06 |
| 1151 | glycolate (hydroxyacetate)        | Xenobiotics            | 2.06 | 1.34 | 1.53 |
| 1157 | glycerol 2-phosphate              | Xenobiotics            | 1.33 | 0.93 | 1.43 |
|      | X - 02973                         | N/A                    | 1.06 | 0.82 | 1.29 |
|      | X - 03002                         | N/A                    | 1.87 | 1.49 | 1.25 |
|      | X - 03094                         | N/A                    | 1.07 | 1.20 | 0.90 |
|      | X - 03998                         | N/A                    | 1.18 | 1.31 | 0.90 |
|      | X - 04077                         | N/A                    | 1.22 | 1.73 | 0.70 |
|      | X - 04599                         | N/A                    | 1.22 | 1.05 | 1.16 |
|      | X - 04633                         | N/A                    | 3.28 | 0.89 | 3.68 |
|      | X - 05228                         | N/A                    | 1.40 | 1.36 | 1.03 |
|      | X - 05420                         | N/A                    | 1.13 | 0.88 | 1.28 |
|      | X - 05428                         | N/A                    | 0.94 | 1.13 | 0.83 |
|      | X - 05978                         | N/A                    | 1.17 | 0.76 | 1.54 |
|      | X - 06869                         | N/A                    | 0.30 | 3.10 | 0.10 |
|      | X - 07890                         | N/A                    | 0.95 | 1.49 | 0.64 |
|      | X - 08166                         | N/A                    | 1.39 | 0.99 | 1.40 |
|      | X - 08169                         | N/A                    | 0.69 | 1.83 | 0.38 |
|      | X - 08172                         | N/A                    | 2.18 | 1.03 | 2.12 |
|      | X - 08895                         | N/A                    | 0.55 | 1.35 | 0.41 |
|      | X - 08994                         | N/A                    | 0.39 | 1.22 | 0.32 |
|      | X - 09069                         | N/A                    | 1.21 | 0.74 | 1.64 |
|      | X - 10457                         | N/A                    | 1.52 | 1.21 | 1.26 |
|      | X - 10500                         | N/A                    | 1.11 | 1.44 | 0.77 |
|      | X - 10677                         | N/A                    | 0.59 | 0.90 | 0.66 |
|      | X - 10734                         | N/A                    | 1.72 | 0.98 | 1.76 |
|      | X - 10739                         | N/A                    | 1.26 | 0.78 | 1.61 |
|      | X - 10830                         | N/A                    | 1.62 | 0.91 | 1.78 |
|      | X - 10835                         | N/A                    | 1.14 | 0.95 | 1.20 |
|      | X - 10875                         | N/A                    | 0.96 | 0.90 | 1.06 |
|      | X - 10876                         | N/A                    | 1.15 | 1.31 | 0.88 |
|      | X - 10889                         | N/A                    | 1.26 | 1.06 | 1.18 |
|      | X - 11327                         | N/A                    | 1.29 | 1.33 | 0.97 |
|      | X - 11412                         | N/A                    | 0.78 | 0.89 | 0.87 |
|      | X - 11509                         | N/A                    | 1.06 | 0.98 | 1.08 |
|      | X - 11533                         | N/A                    | 1.11 | 1.11 | 1.00 |
|      | X - 11542                         | N/A                    | 1.10 | 0.95 | 1.16 |
|      | X - 11580                         | N/A                    | 0.47 | 0.88 | 0.53 |
|      | X - 11583                         | N/A                    | 0.46 | 0.61 | 0.76 |
|      | X - 11596                         | N/A                    | 0.64 | 1.05 | 0.61 |
|      | X - 11615                         | N/A                    | 0.65 | 1.11 | 0.58 |
|      | X - 11618                         | N/A                    | 0.96 | 1.56 | 0.61 |
|      | X - 11619                         | N/A                    | 0.96 | 1.02 | 0.93 |
|      | X - 11624                         | N/A                    | 0.77 | 1.19 | 0.65 |
|      | X - 11629                         | N/A                    | 0.79 | 0.80 | 0.99 |
|      | X - 11630                         | N/A                    | 0.71 | 0.83 | 0.85 |
|      | X - 11631                         | N/A                    | 0.72 | 0.66 | 1.10 |
|      | X - 11639                         | N/A                    | 1.07 | 0.71 | 1.50 |
|      | X - 11641                         | N/A                    | 1.15 | 1.06 | 1.08 |
|      | X - 11861                         | N/A                    | 1.21 | 1.13 | 1.07 |
|      | X - 11875                         | N/A                    | 1.00 | 1.11 | 0.91 |
|      | X - 11886                         | N/A                    | 1.31 | 1.43 | 0.91 |

|  |           |     |      |      |       |
|--|-----------|-----|------|------|-------|
|  | X - 12051 | N/A | 1.30 | 1.74 | 0.74  |
|  | X - 12244 | N/A | 1.17 | 0.84 | 1.40  |
|  | X - 12421 | N/A | 0.87 | 1.91 | 0.45  |
|  | X - 12422 | N/A | 1.04 | 2.29 | 0.45  |
|  | X - 12465 | N/A | 4.96 | 2.77 | 1.79  |
|  | X - 12645 | N/A | 1.53 | 1.31 | 1.17  |
|  | X - 12660 | N/A | 1.33 | 2.13 | 0.62  |
|  | X - 12665 | N/A | 1.31 | 1.02 | 1.29  |
|  | X - 12790 | N/A | 0.59 | 1.07 | 0.55  |
|  | X - 12801 | N/A | 0.85 | 1.14 | 0.74  |
|  | X - 12855 | N/A | 1.57 | 2.13 | 0.74  |
|  | X - 12860 | N/A | 1.42 | 1.64 | 0.86  |
|  | X - 12985 | N/A | 0.81 | 0.88 | 0.92  |
|  | X - 12986 | N/A | 0.64 | 0.67 | 0.96  |
|  | X - 12991 | N/A | 0.73 | 1.04 | 0.70  |
|  | X - 13005 | N/A | 1.18 | 0.96 | 1.23  |
|  | X - 13007 | N/A | 0.87 | 1.35 | 0.64  |
|  | X - 13215 | N/A | 1.04 | 1.33 | 0.78  |
|  | X - 13230 | N/A | 0.98 | 0.79 | 1.25  |
|  | X - 13462 | N/A | 0.99 | 0.86 | 1.16  |
|  | X - 13496 | N/A | 0.97 | 1.52 | 0.63  |
|  | X - 13505 | N/A | 9.75 | 0.69 | 14.05 |
|  | X - 13538 | N/A | 0.60 | 0.96 | 0.62  |
|  | X - 13543 | N/A | 0.97 | 3.70 | 0.26  |
|  | X - 13557 | N/A | 1.25 | 0.90 | 1.38  |
|  | X - 13560 | N/A | 1.05 | 1.12 | 0.94  |
|  | X - 13743 | N/A | 0.82 | 0.82 | 0.99  |
|  | X - 13821 | N/A | 0.88 | 1.09 | 0.81  |
|  | X - 13872 | N/A | 0.96 | 1.10 | 0.88  |
|  | X - 13929 | N/A | 0.83 | 1.01 | 0.82  |
|  | X - 14125 | N/A | 0.68 | 0.89 | 0.77  |
|  | X - 14126 | N/A | 0.32 | 1.00 | 0.32  |
|  | X - 14134 | N/A | 0.62 | 0.89 | 0.69  |
|  | X - 14145 | N/A | 0.70 | 0.86 | 0.82  |
|  | X - 14164 | N/A | 0.75 | 0.89 | 0.84  |
|  | X - 14176 | N/A | 0.66 | 0.92 | 0.72  |
|  | X - 14181 | N/A | 0.79 | 0.97 | 0.82  |
|  | X - 14186 | N/A | 0.64 | 1.10 | 0.58  |
|  | X - 14189 | N/A | 0.68 | 0.88 | 0.77  |
|  | X - 14192 | N/A | 0.71 | 0.96 | 0.74  |
|  | X - 14193 | N/A | 0.56 | 0.85 | 0.66  |
|  | X - 14204 | N/A | 0.65 | 1.00 | 0.64  |
|  | X - 14205 | N/A | 0.78 | 0.88 | 0.89  |
|  | X - 14208 | N/A | 0.61 | 0.86 | 0.72  |
|  | X - 14231 | N/A | 0.66 | 0.89 | 0.74  |
|  | X - 14234 | N/A | 0.68 | 0.85 | 0.80  |
|  | X - 14236 | N/A | 1.26 | 1.17 | 1.08  |
|  | X - 14241 | N/A | 0.67 | 1.10 | 0.61  |
|  | X - 14256 | N/A | 0.75 | 0.82 | 0.91  |
|  | X - 14258 | N/A | 0.75 | 1.09 | 0.69  |
|  | X - 14262 | N/A | 0.54 | 0.92 | 0.58  |
|  | X - 14271 | N/A | 0.77 | 0.96 | 0.80  |
|  | X - 14272 | N/A | 0.81 | 1.05 | 0.77  |
|  | X - 14278 | N/A | 0.73 | 1.03 | 0.71  |
|  | X - 14284 | N/A | 0.73 | 0.97 | 0.75  |

|  |           |     |      |      |      |
|--|-----------|-----|------|------|------|
|  | X - 14299 | N/A | 0.63 | 0.80 | 0.78 |
|  | X - 14372 | N/A | 0.84 | 1.01 | 0.83 |
|  | X - 14379 | N/A | 0.61 | 0.99 | 0.62 |
|  | X - 14418 | N/A | 0.44 | 0.92 | 0.48 |
|  | X - 14474 | N/A | 0.85 | 0.95 | 0.89 |
|  | X - 14567 | N/A | 1.13 | 1.42 | 0.80 |
|  | X - 14699 | N/A | 0.55 | 1.06 | 0.51 |
|  | X - 14904 | N/A | 0.86 | 1.25 | 0.69 |
|  | X - 15149 | N/A | 0.53 | 0.97 | 0.54 |
|  | X - 15158 | N/A | 0.59 | 1.03 | 0.58 |
|  | X - 15222 | N/A | 1.00 | 1.24 | 0.81 |
|  | X - 15300 | N/A | 0.50 | 0.81 | 0.62 |
|  | X - 15301 | N/A | 0.92 | 1.15 | 0.80 |
|  | X - 15555 | N/A | 0.82 | 1.03 | 0.79 |
|  | X - 15558 | N/A | 0.89 | 0.79 | 1.13 |
|  | X - 15559 | N/A | 0.92 | 0.84 | 1.10 |
|  | X - 15562 | N/A | 0.93 | 0.56 | 1.67 |
|  | X - 15563 | N/A | 0.84 | 0.80 | 1.05 |
|  | X - 15598 | N/A | 0.48 | 1.27 | 0.38 |
|  | X - 15607 | N/A | 0.29 | 0.93 | 0.31 |
|  | X - 15624 | N/A | 1.00 | 1.03 | 0.97 |
|  | X - 15808 | N/A | 1.44 | 0.69 | 2.08 |
|  | X - 15933 | N/A | 1.22 | 0.94 | 1.30 |
|  | X - 15937 | N/A | 0.85 | 0.75 | 1.14 |
|  | X - 15939 | N/A | 1.04 | 0.93 | 1.12 |
|  | X - 16209 | N/A | 1.02 | 1.04 | 0.98 |
|  | X - 16299 | N/A | 0.95 | 1.06 | 0.90 |
|  | X - 16340 | N/A | 0.70 | 0.93 | 0.76 |
|  | X - 16439 | N/A | 0.90 | 0.56 | 1.60 |
|  | X - 16468 | N/A | 0.84 | 1.07 | 0.79 |
|  | X - 16578 | N/A | 0.92 | 1.08 | 0.85 |
|  | X - 16603 | N/A | 1.40 | 0.68 | 2.06 |
|  | X - 16604 | N/A | 0.57 | 1.19 | 0.48 |
|  | X - 16607 | N/A | 0.39 | 1.21 | 0.32 |
|  | X - 16610 | N/A | 1.87 | 0.92 | 2.04 |
|  | X - 16613 | N/A | 1.56 | 1.09 | 1.43 |
|  | X - 16617 | N/A | 0.93 | 0.79 | 1.18 |
|  | X - 17010 | N/A | 1.65 | 0.96 | 1.72 |
|  | X - 17163 | N/A | 1.10 | 1.12 | 0.99 |
